# Supplementary material for: BIBR1532 inhibits proliferation and enhances apoptosis in multiple myeloma cells by reducing telomerase activity
Source: PeerJ journal article supplement (doi:10.7717/peerj.16404), 2023-11-08

Figure 3B  
The original blot of GAPDH in K562 cells

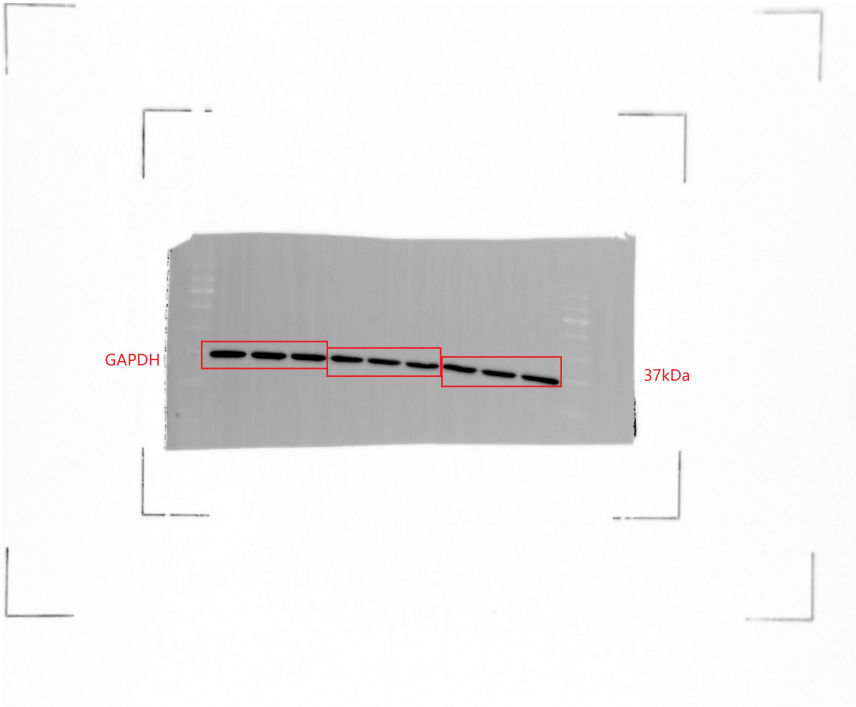

Figure 3B

The original blot of Bcl-XL in K562 cells

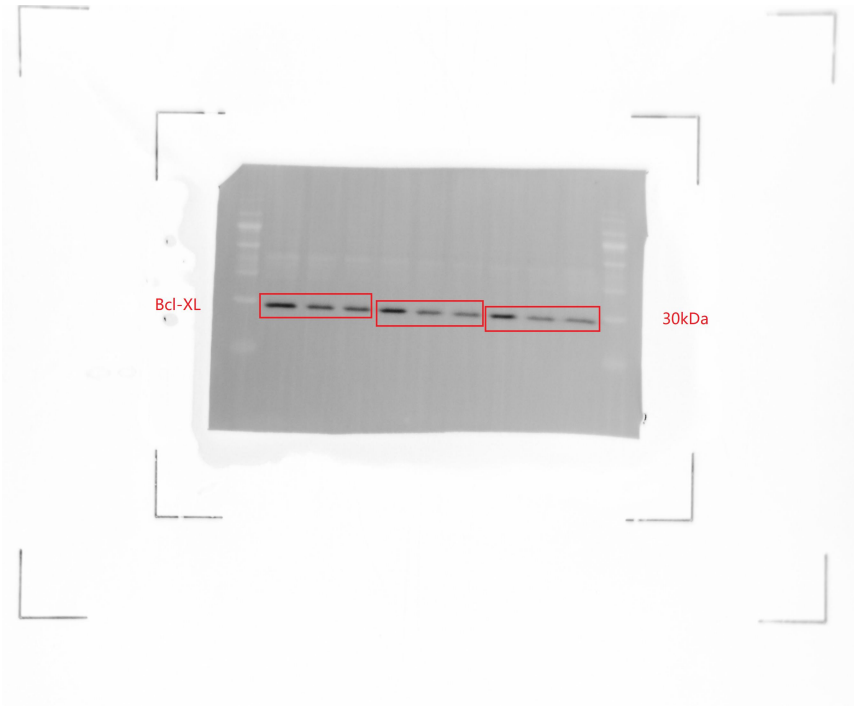

Figure 3B  
The original blot of Bad in K562 cells

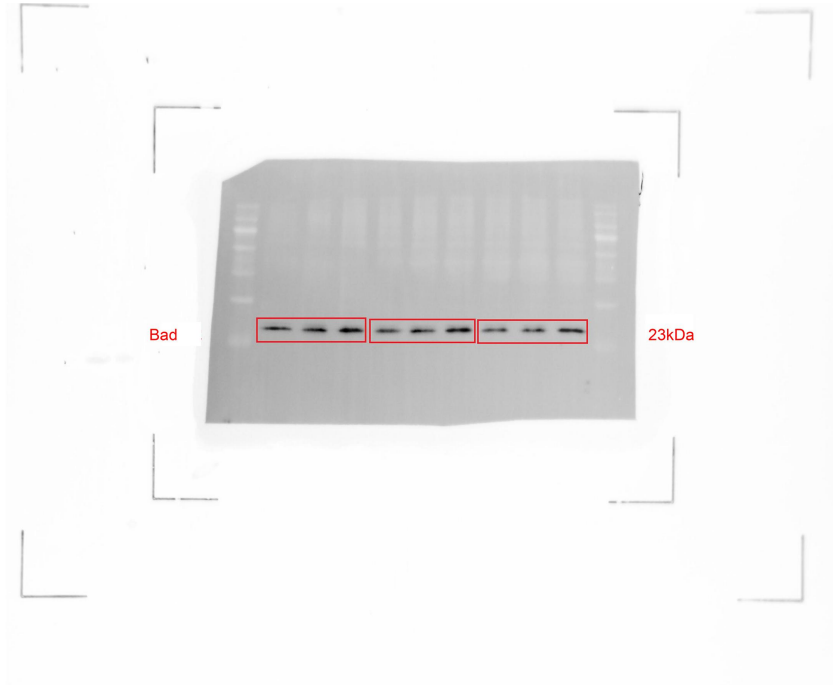

Figure 3B  
The original blot of Survivin in K562 cells

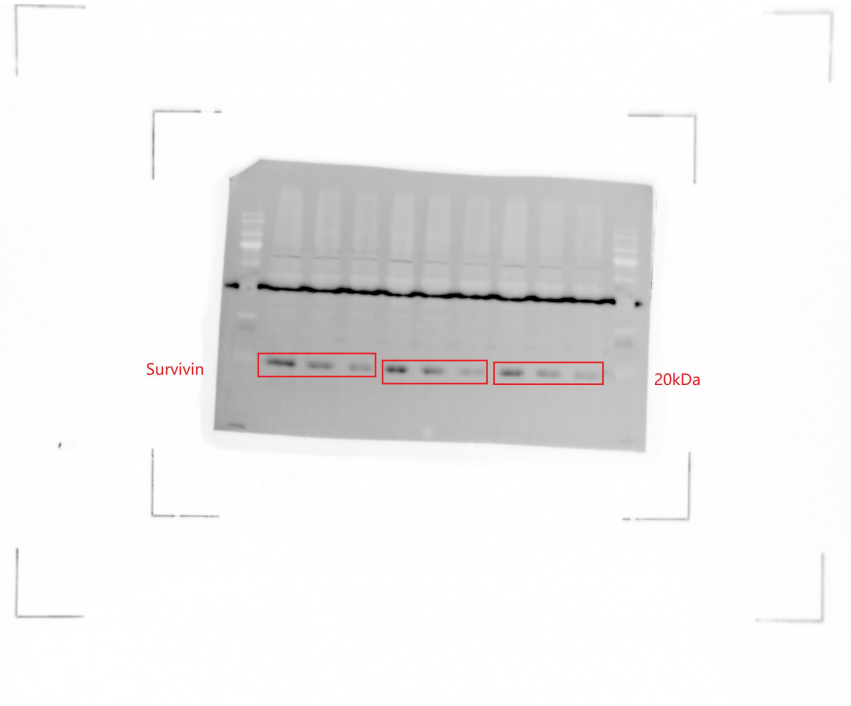



Figure 3B  
The original blot of GAPDH in MEG-01 cells

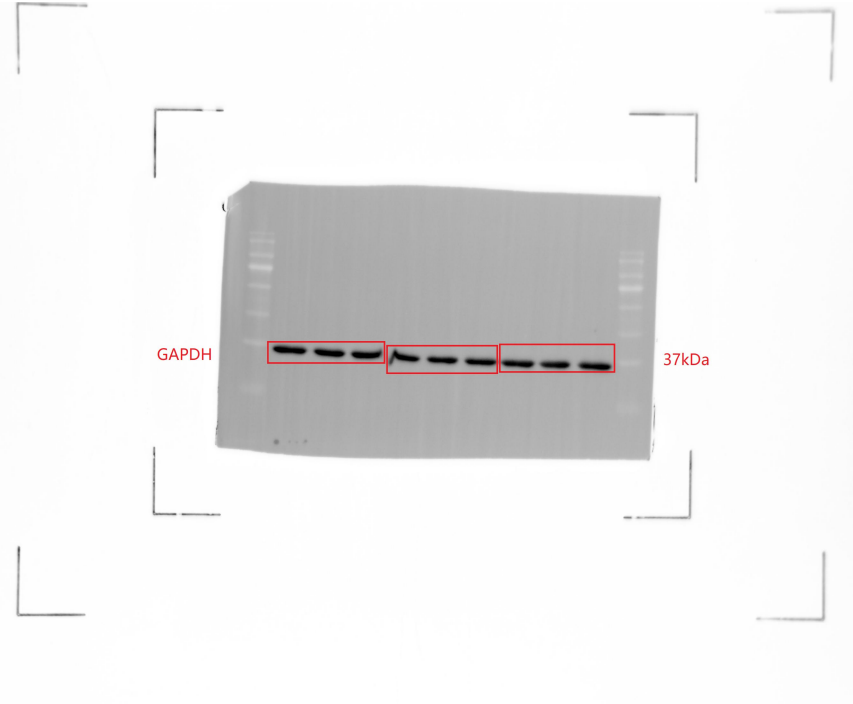

Figure 3B  
The original blot of Bcl-XL in MEG-01 cells

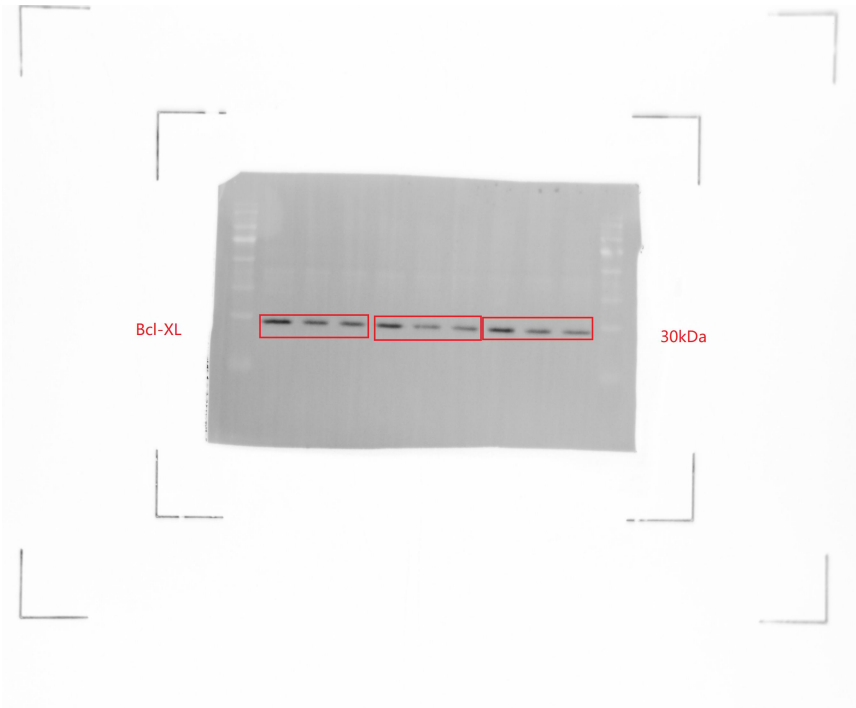

Figure 3B

The original blot of Bad in MEG-01 cells

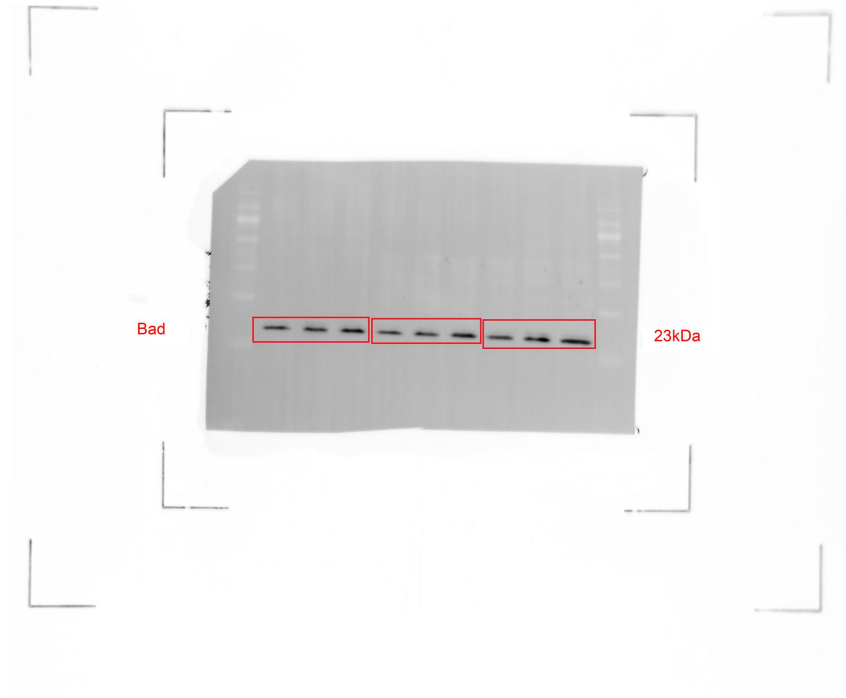

Figure 3B  
The original blot of Survivin in MEG-01 cells

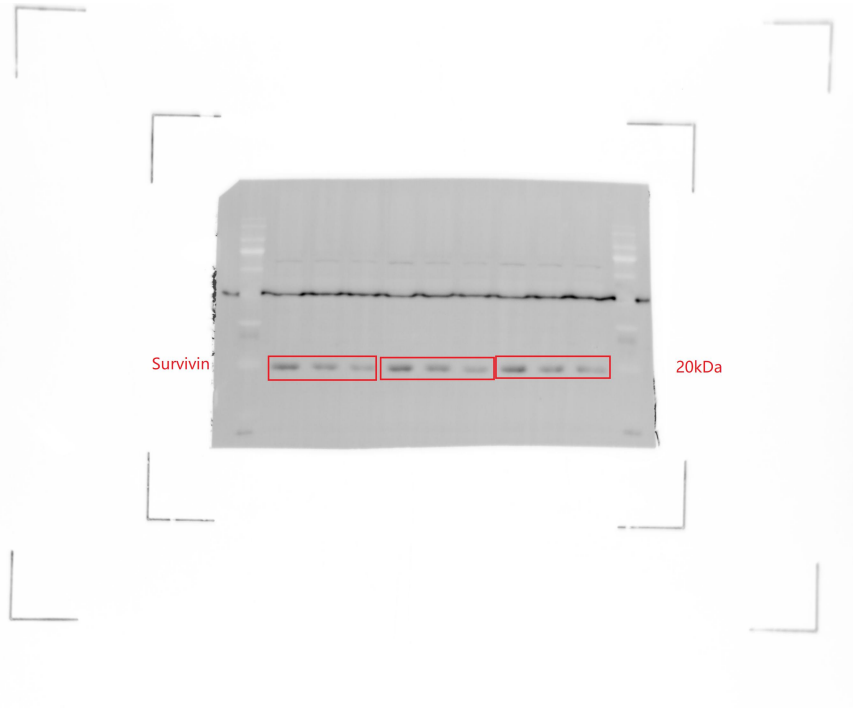

Figure 4B  
The original blot of GAPDH in K562 cells

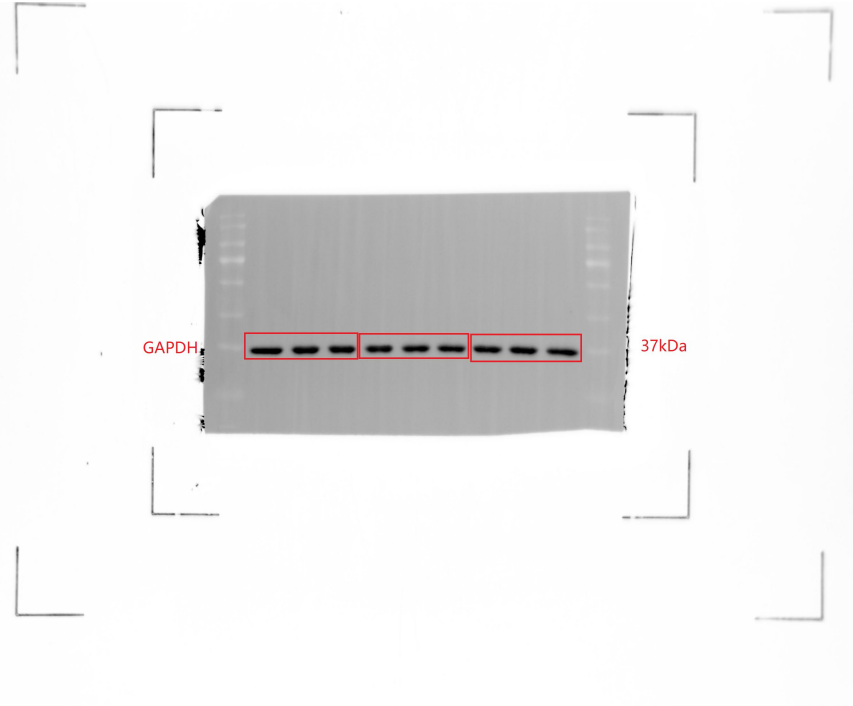

Figure 4B  
The original blot of hTERT in K562 cells

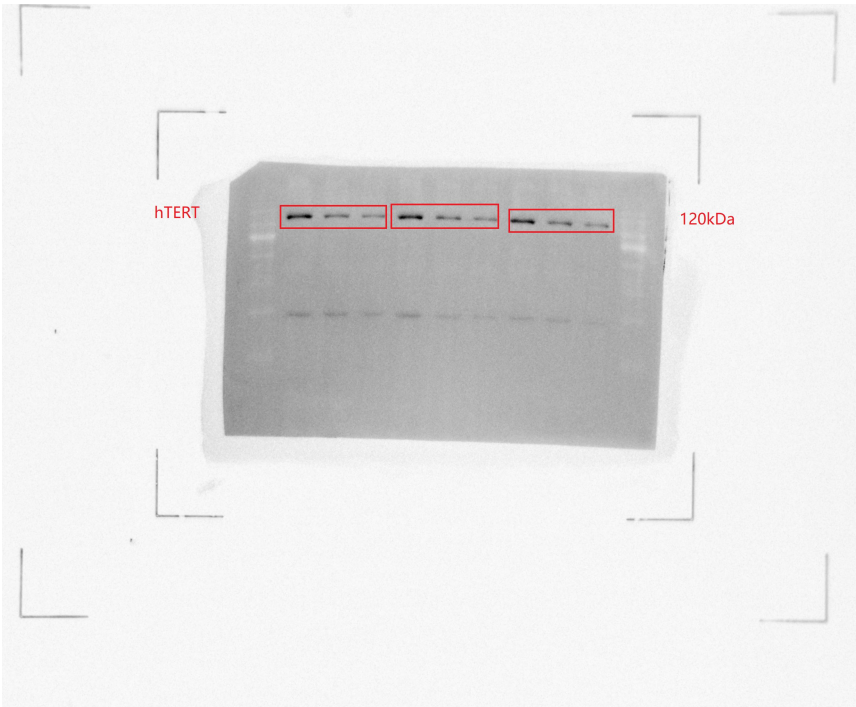

Figure 4B

The original blot of c-MYC in K562 cells

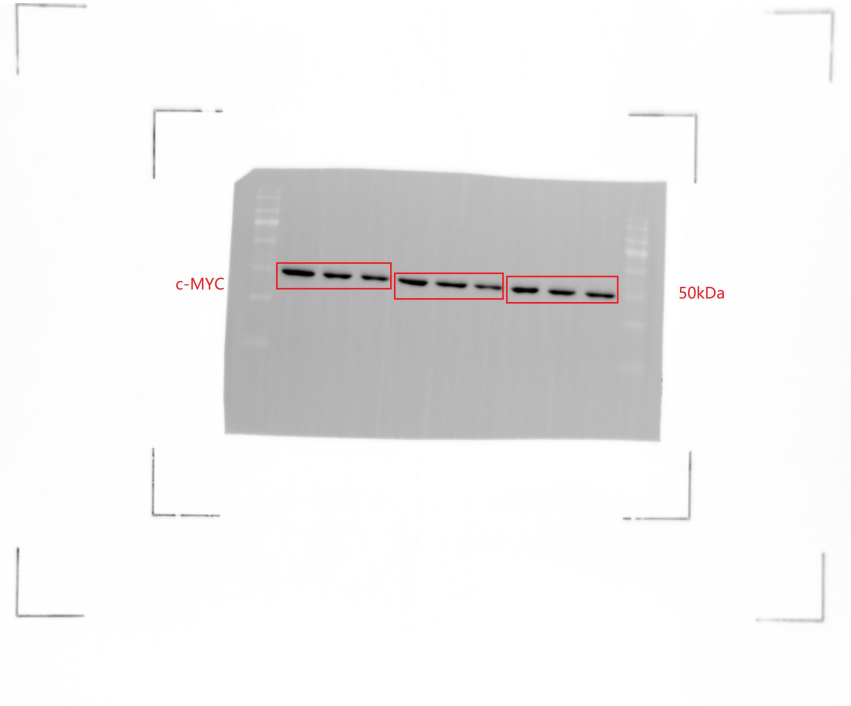

Figure 4B

The original blot of GAPDH in MEG-01 cells

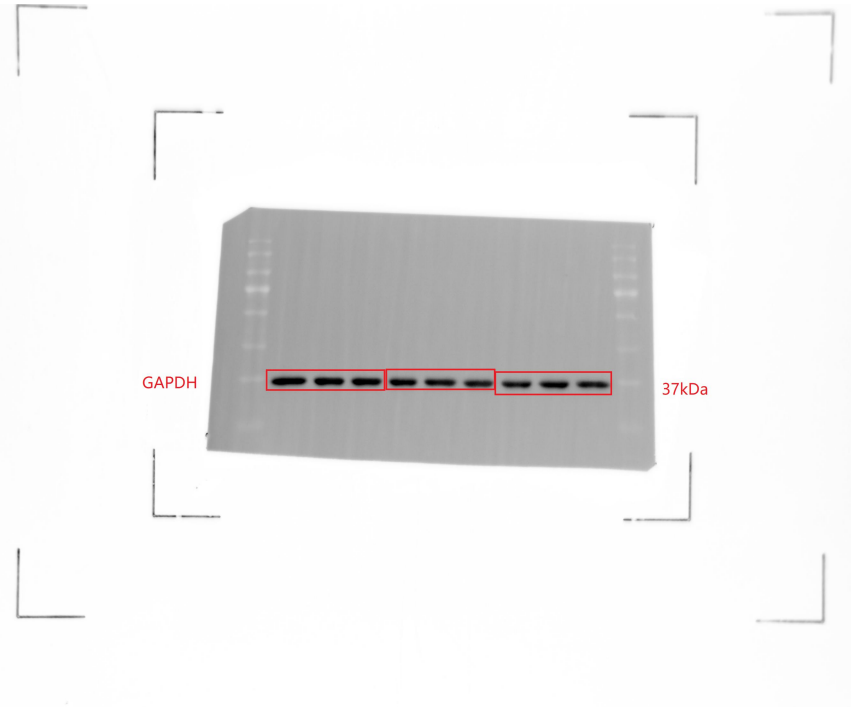



Figure 4B  
The original blot of hTERT in MEG-01 cells

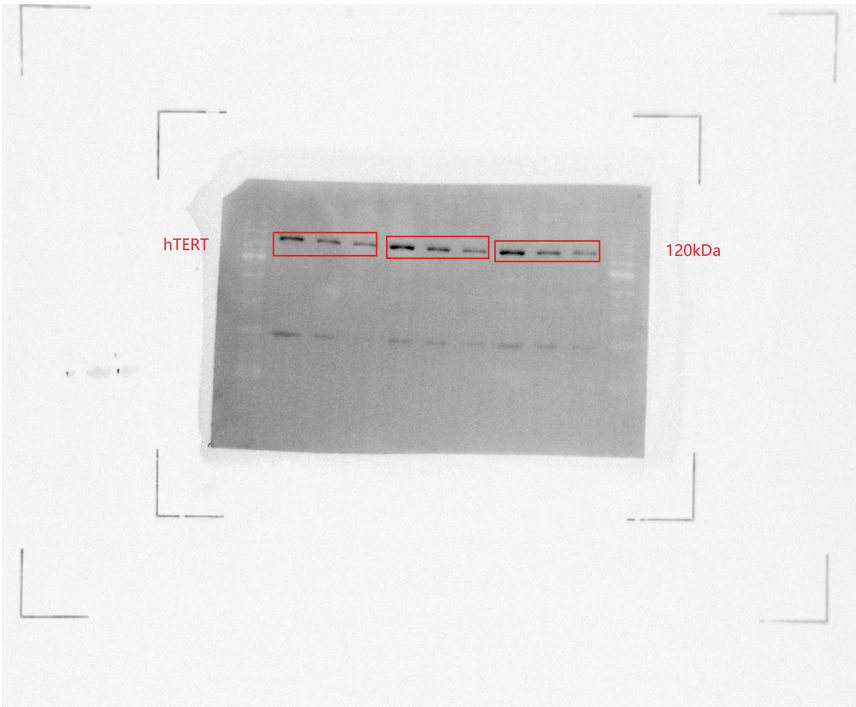

Figure 4B

The original blot of c-MYC in MEG-01 cells

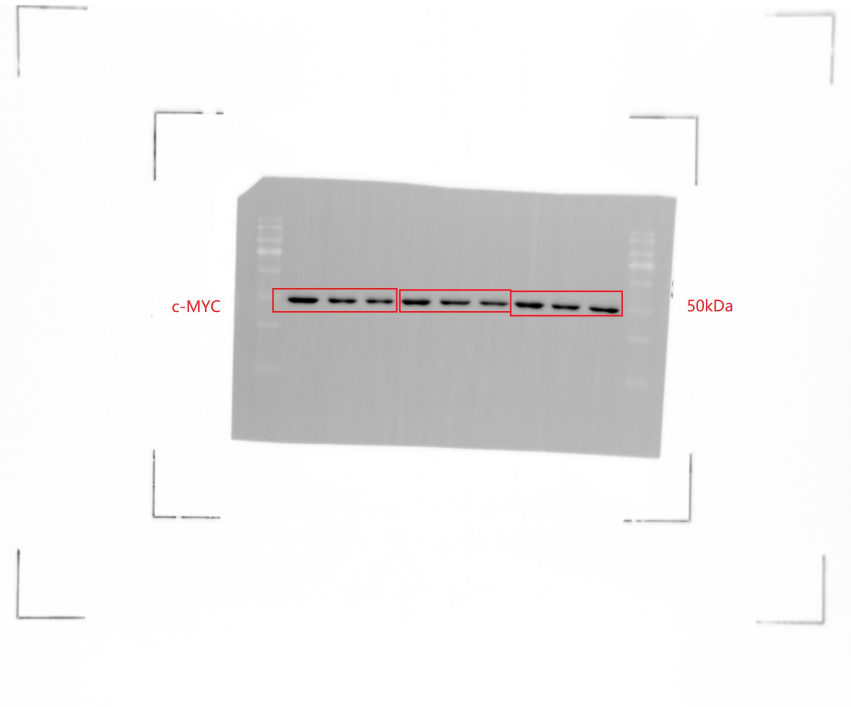

Figure 5A  
The original blot of GAPDH in K562 cells

GAPDH 36kDa

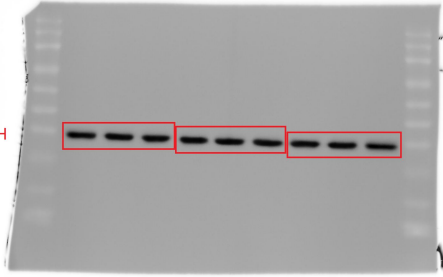

Figure 5A  
The original blot of PI3K in K562 cells

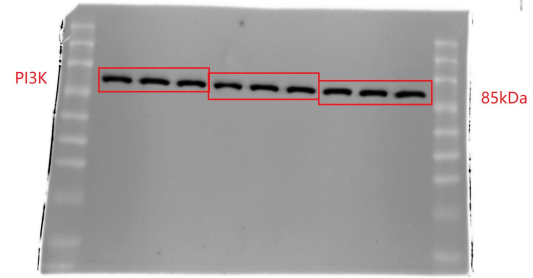

Figure 5A

The original blot of p-PI3K in K562 cells

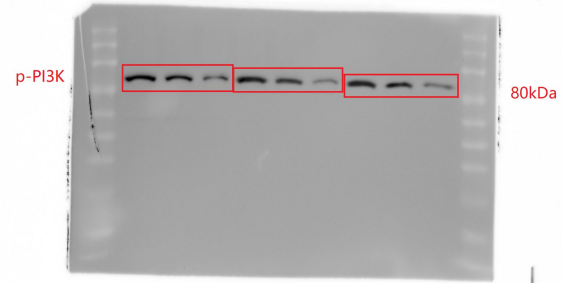

Figure 5A  
The original blot of GAPDH in K562 cells

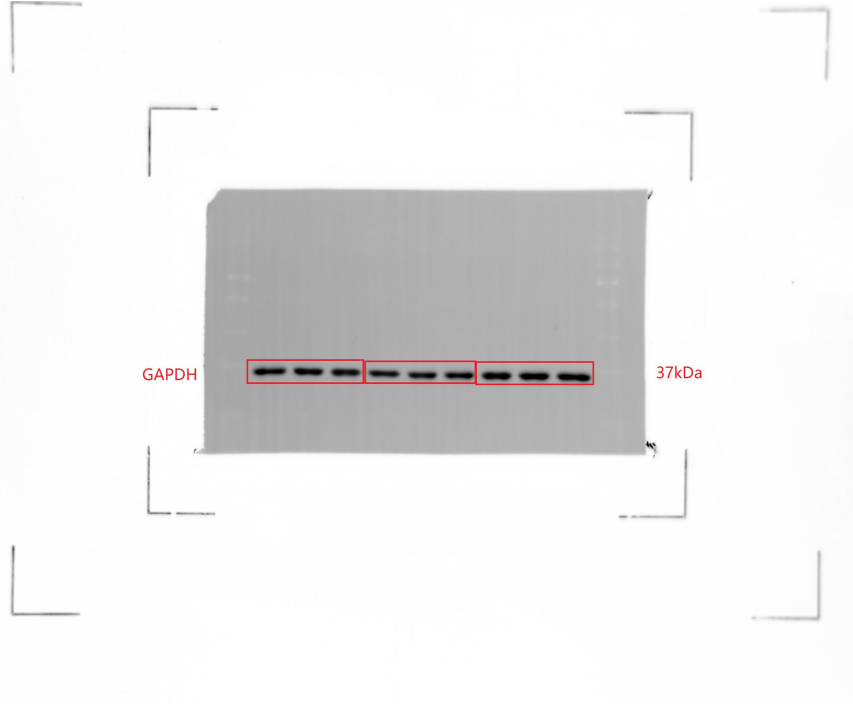

Figure 5A  
The original blot of AKT in K562 cells

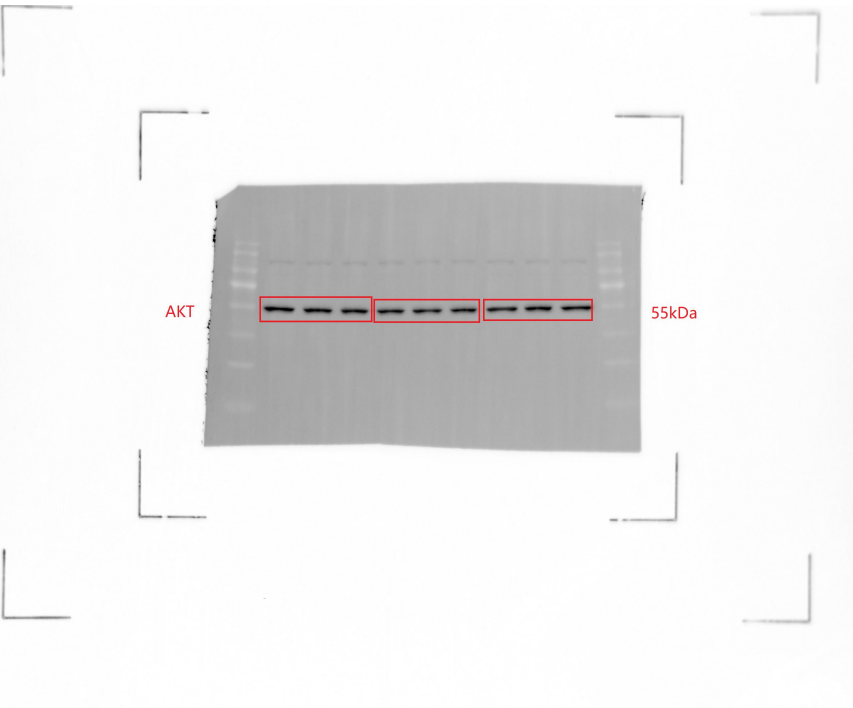

Figure 5A  
The original blot of P-AKT in K562 cells

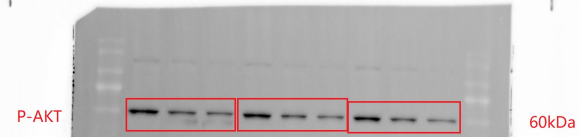



Figure 5A  
The original blot of mTOR in K562 cells

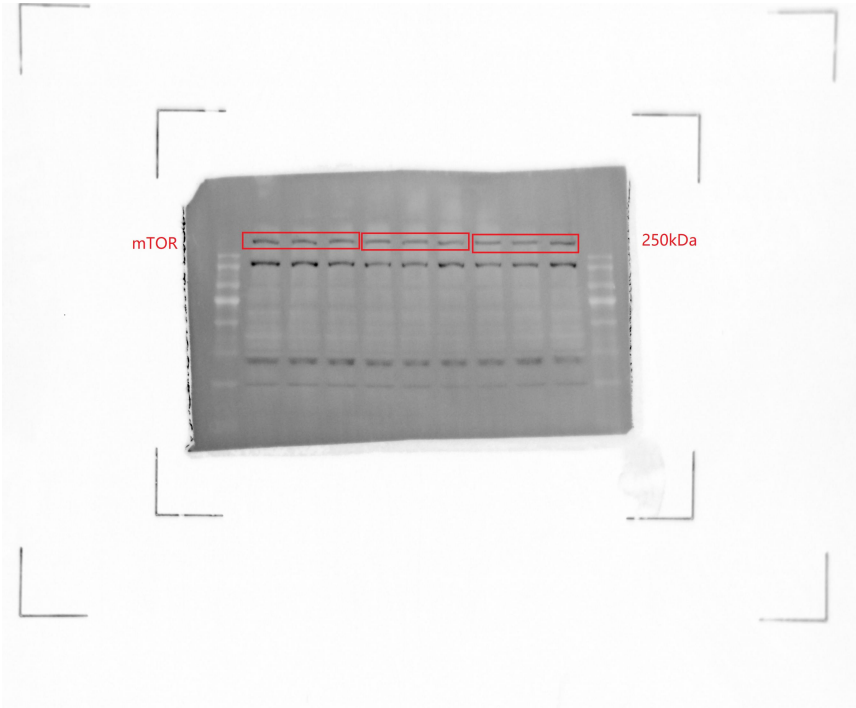

Figure 5A  
The original blot of P-mTOR in K562 cells

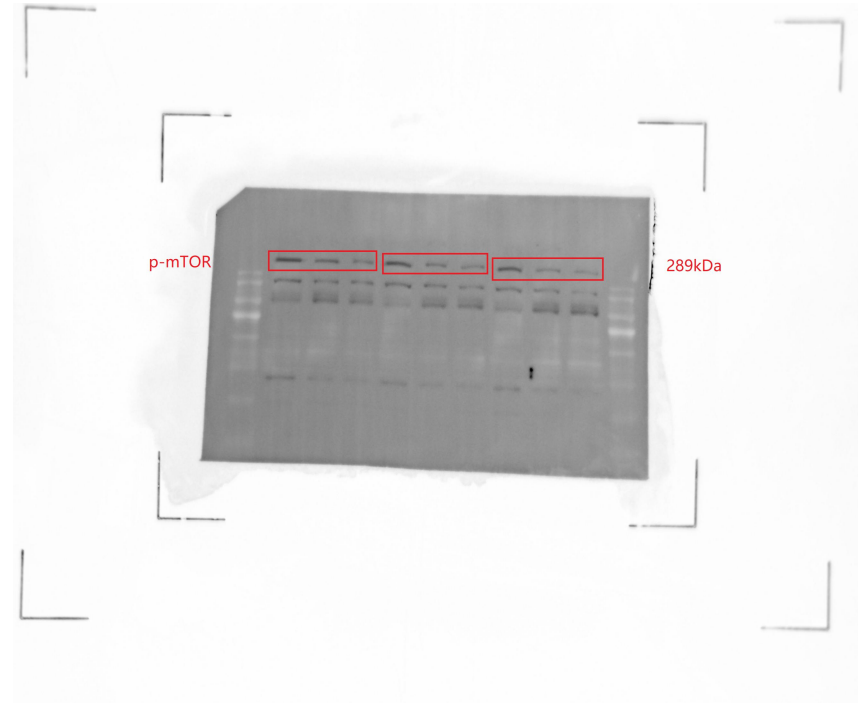

Figure 5A  
The original blot of ERK in K562 cells

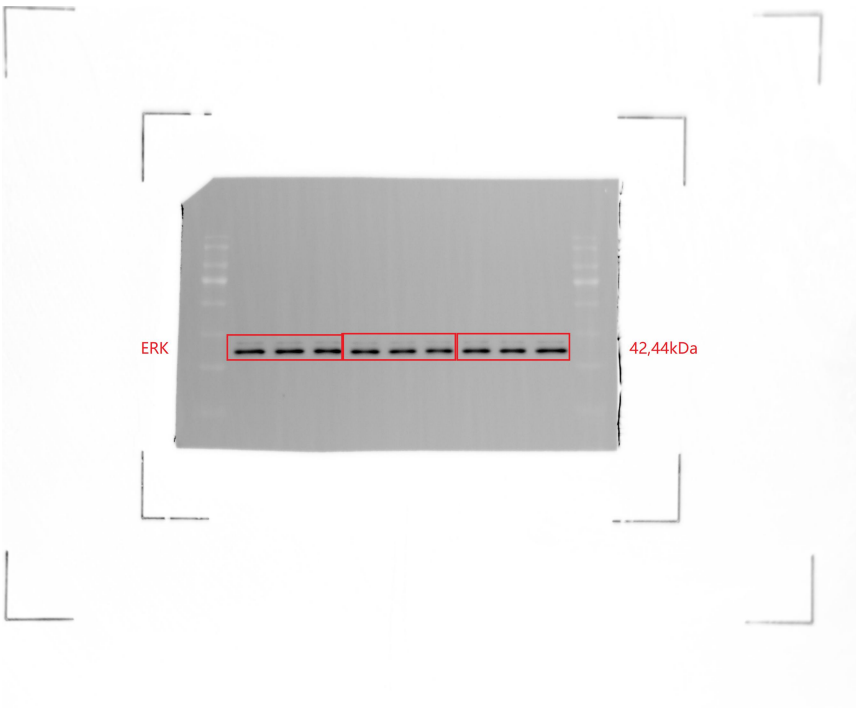

Figure 5A  
The original blot of P-ERK in K562 cells

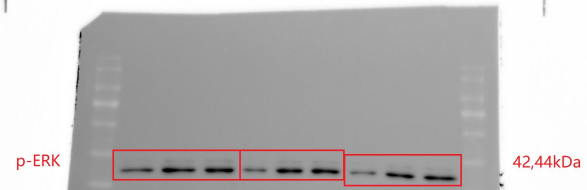

Figure 5A  
The original blot of MAPK in K562 cells

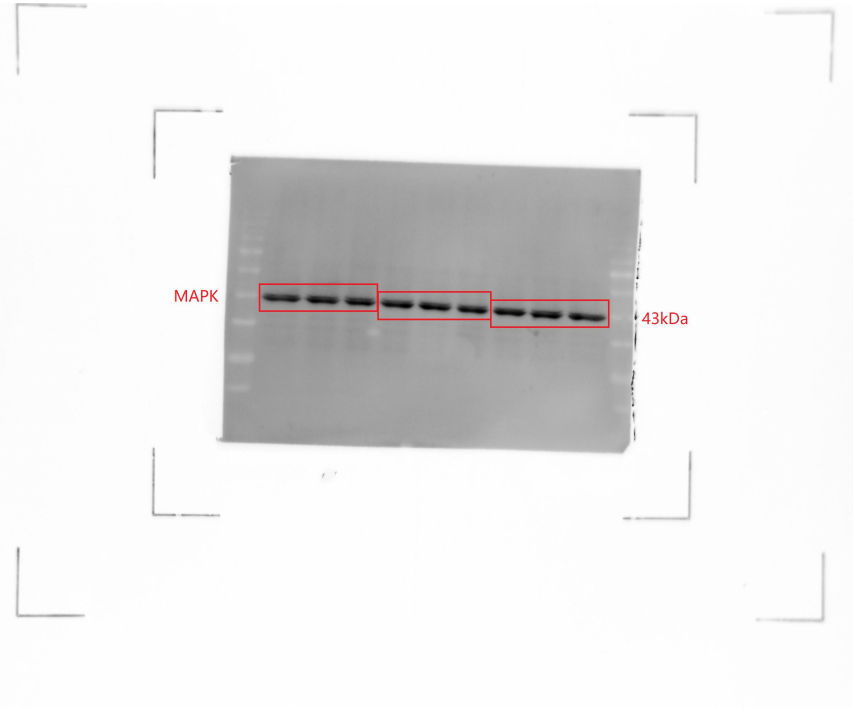

Figure 5A  
The original blot of P-MAPK in K562 cells

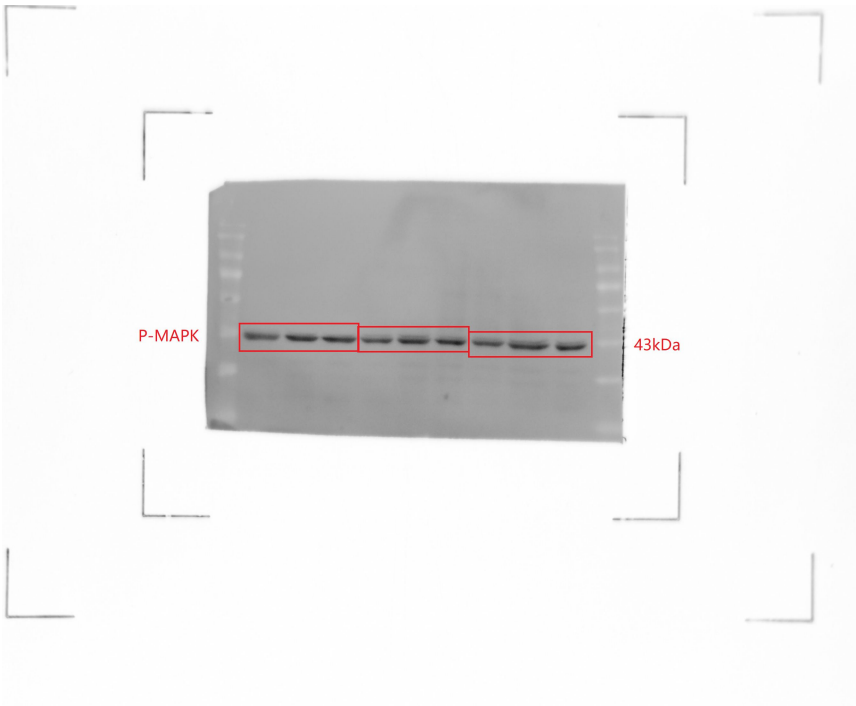

Figure 5B

The original blot of GAPDH in MEG-01 cells

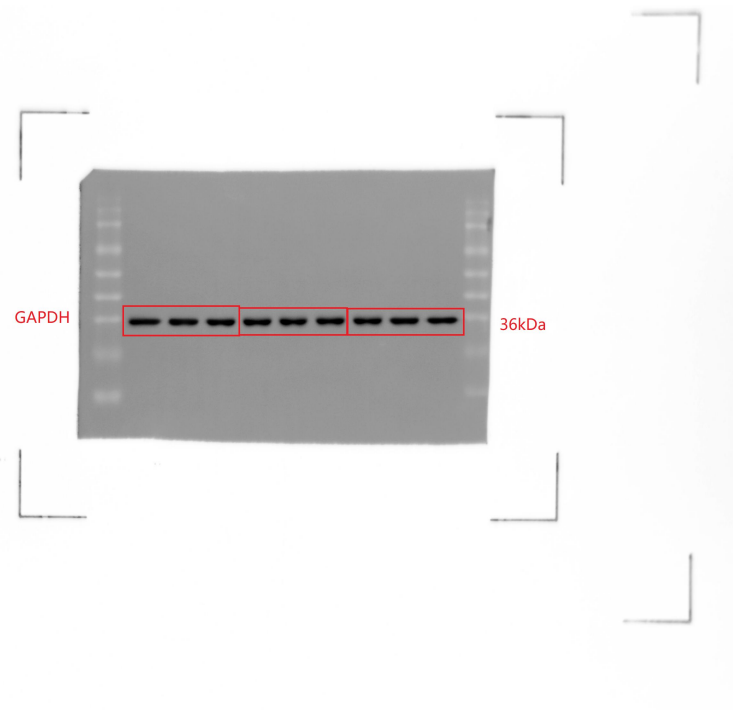

Figure 5B

The original blot of PI3K in MEG-01 cells

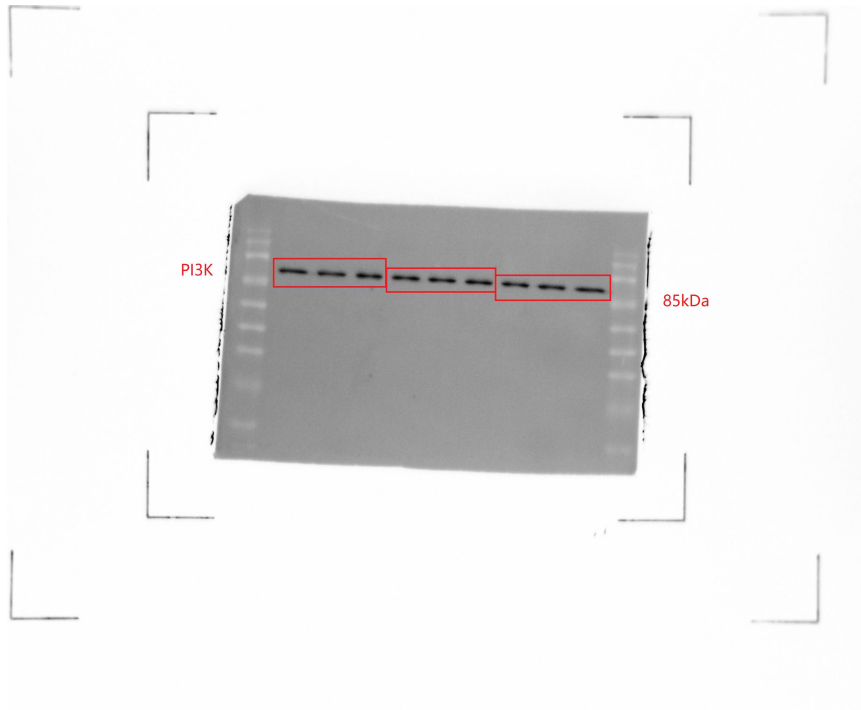



Figure 5B

The original blot of p-PI3K in MEG-01 cells

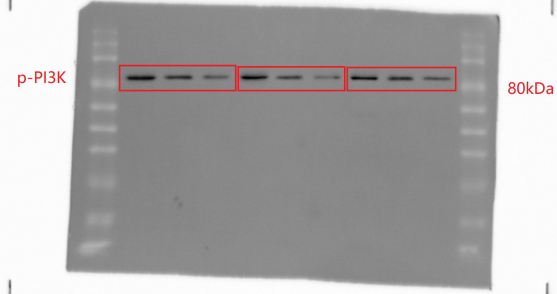

Figure 5B

The original blot of GAPDH in MEG-01 cells

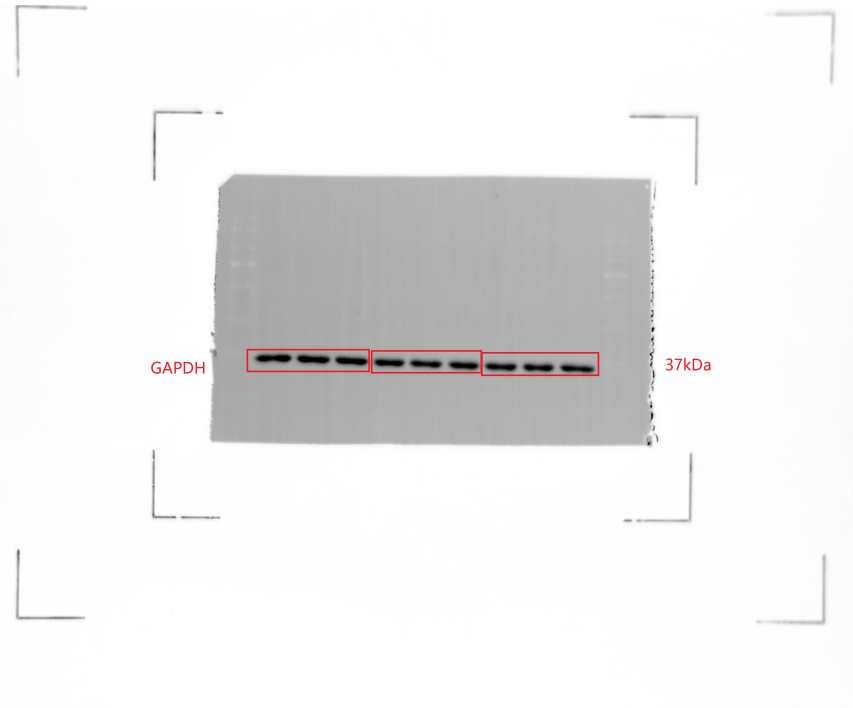

Figure 5B  
The original blot of AKT in MEG-01 cells

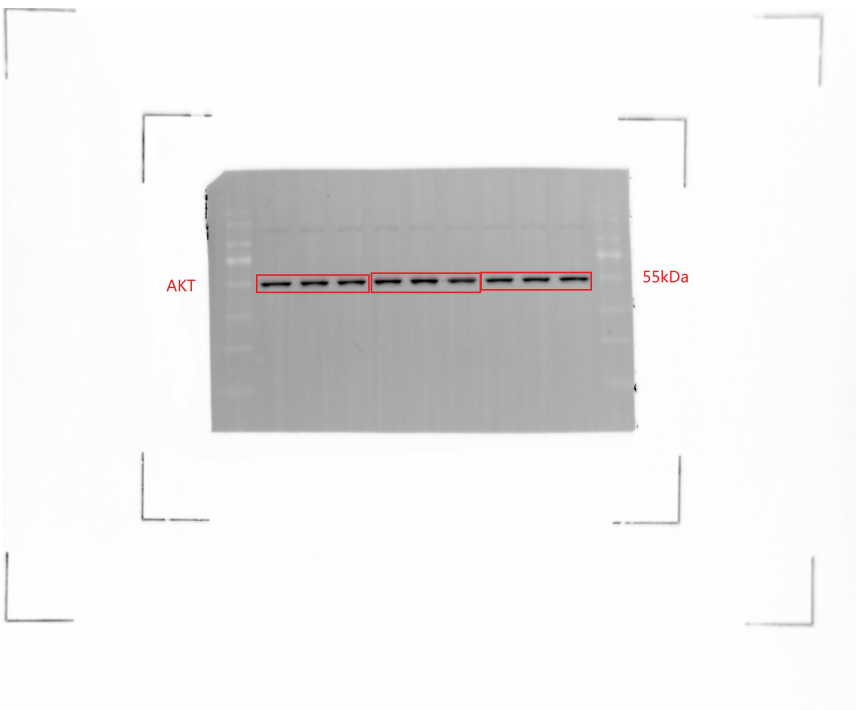

Figure 5B

The original blot of P-AKT in MEG-01 cells

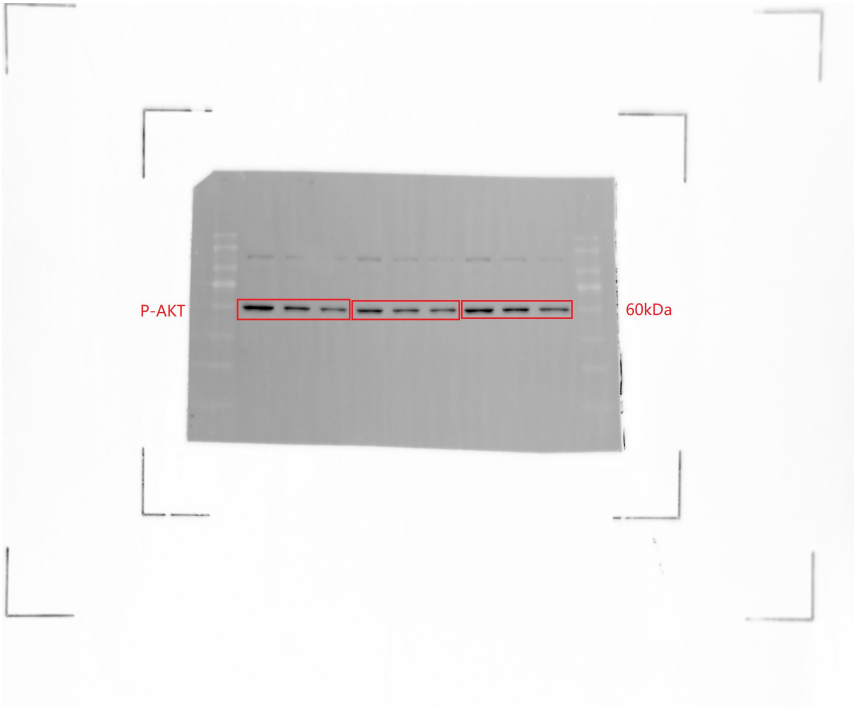

Figure 5B  
The original blot of mTOR in MEG-01 cells

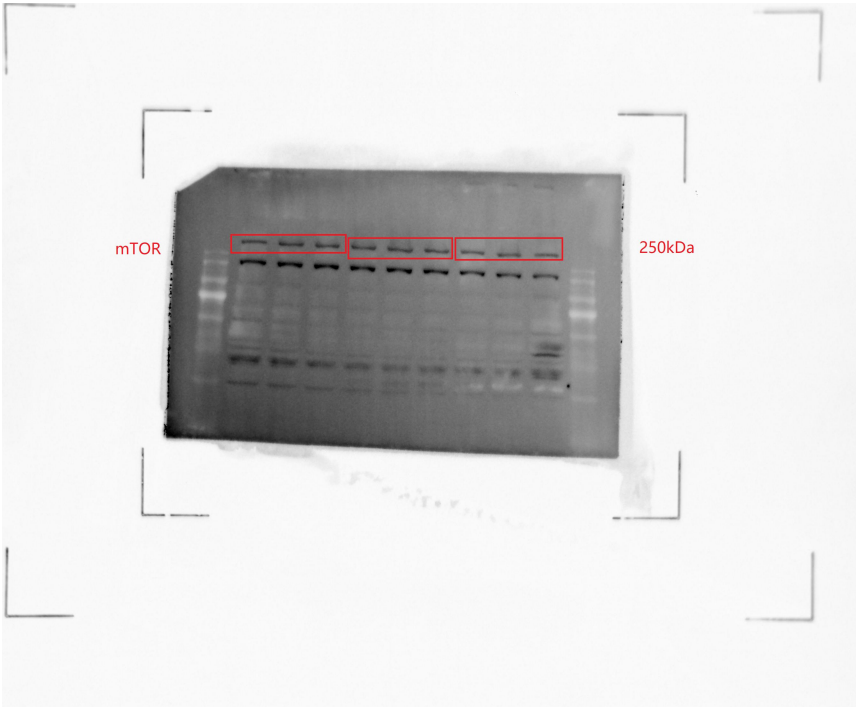

Figure 5B  
The original blot of P-mTOR in MEG-01 cells

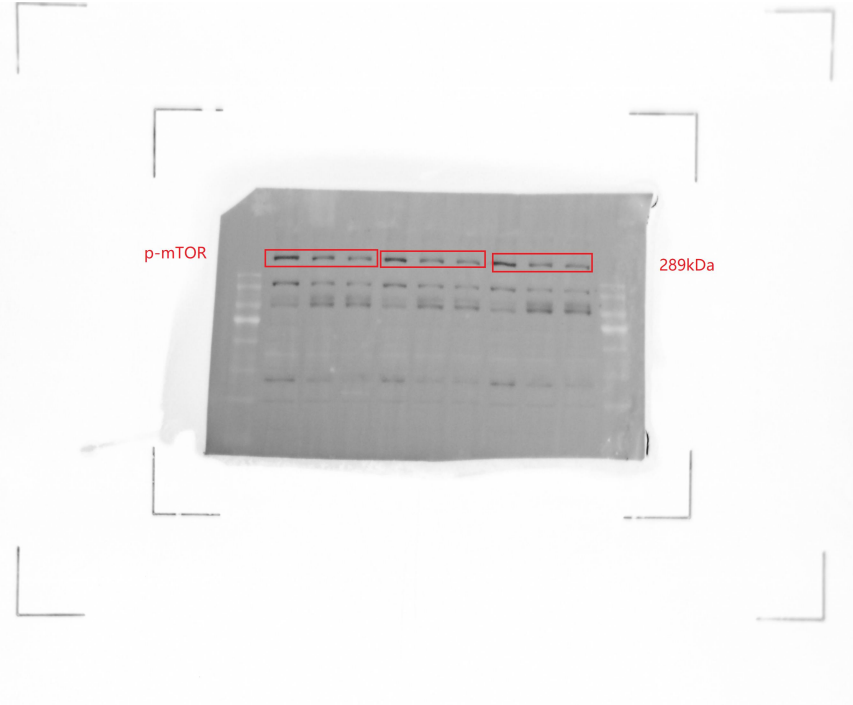

Figure 5B

The original blot of ERK in MEG-01 cells

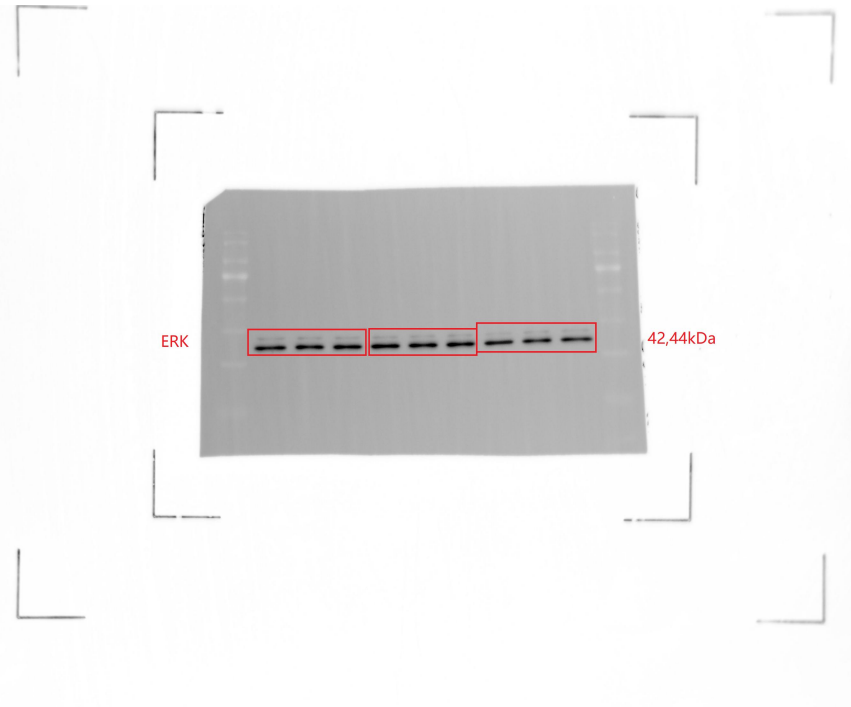

Figure 5B

The original blot of p-ERK in MEG-01 cells

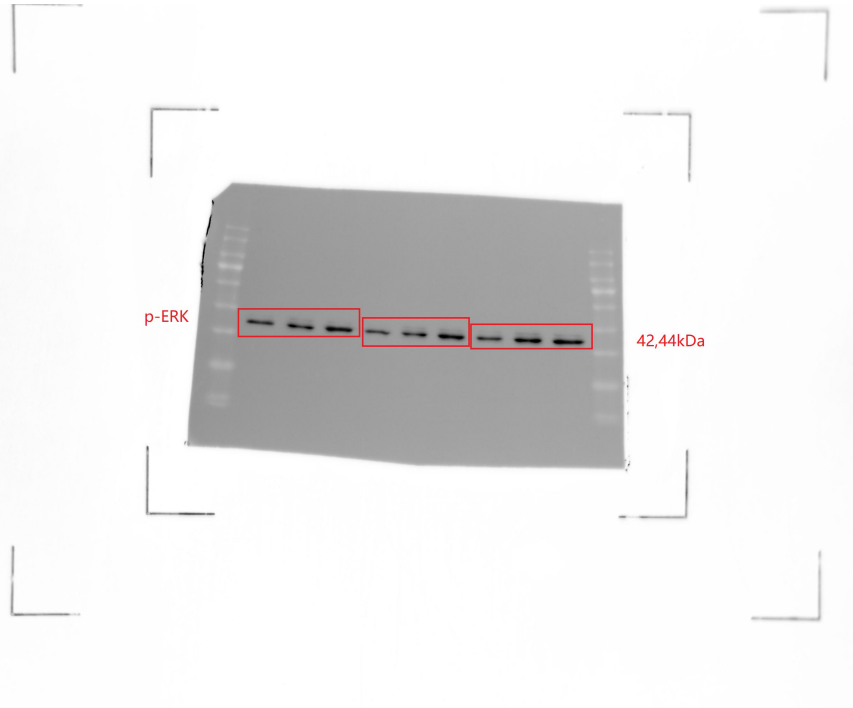



Figure 5B

The original blot of MAPK in MEG-01 cells

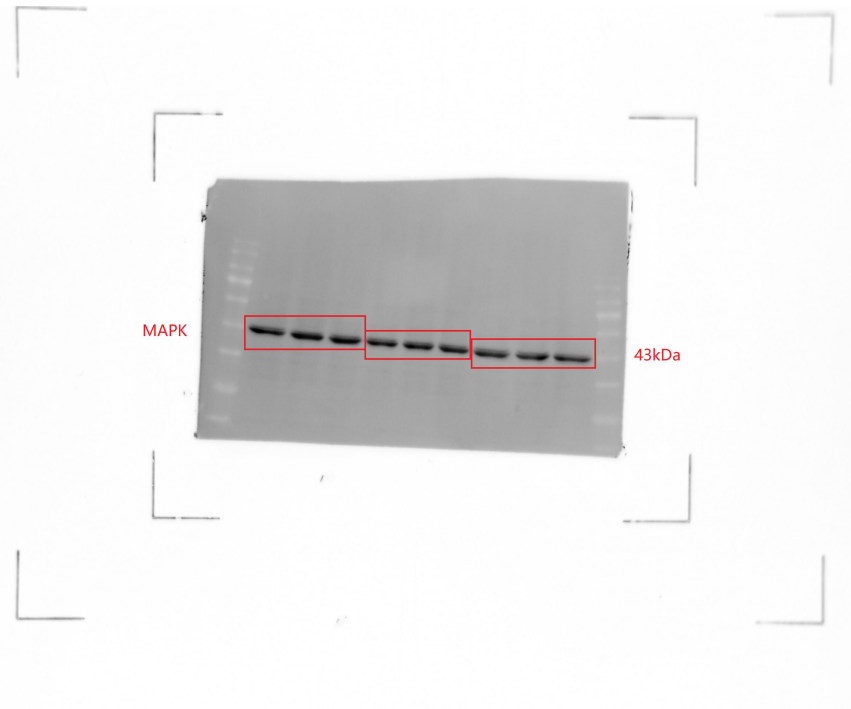

Figure 5B

The original blot of P-MAPK in MEG-01 cells

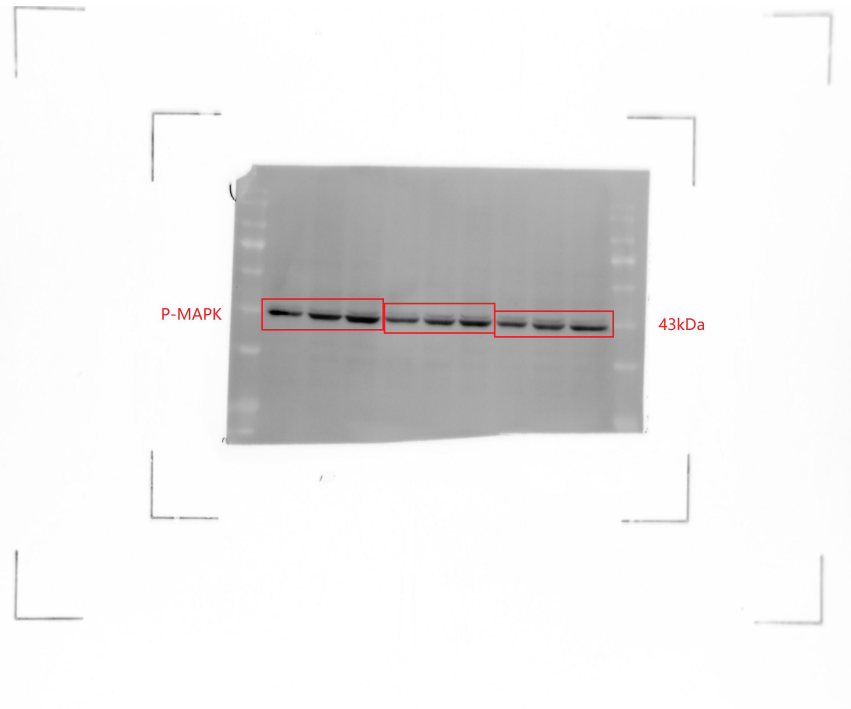

Figure 6C  
The original blot of GAPDH in K562 cells

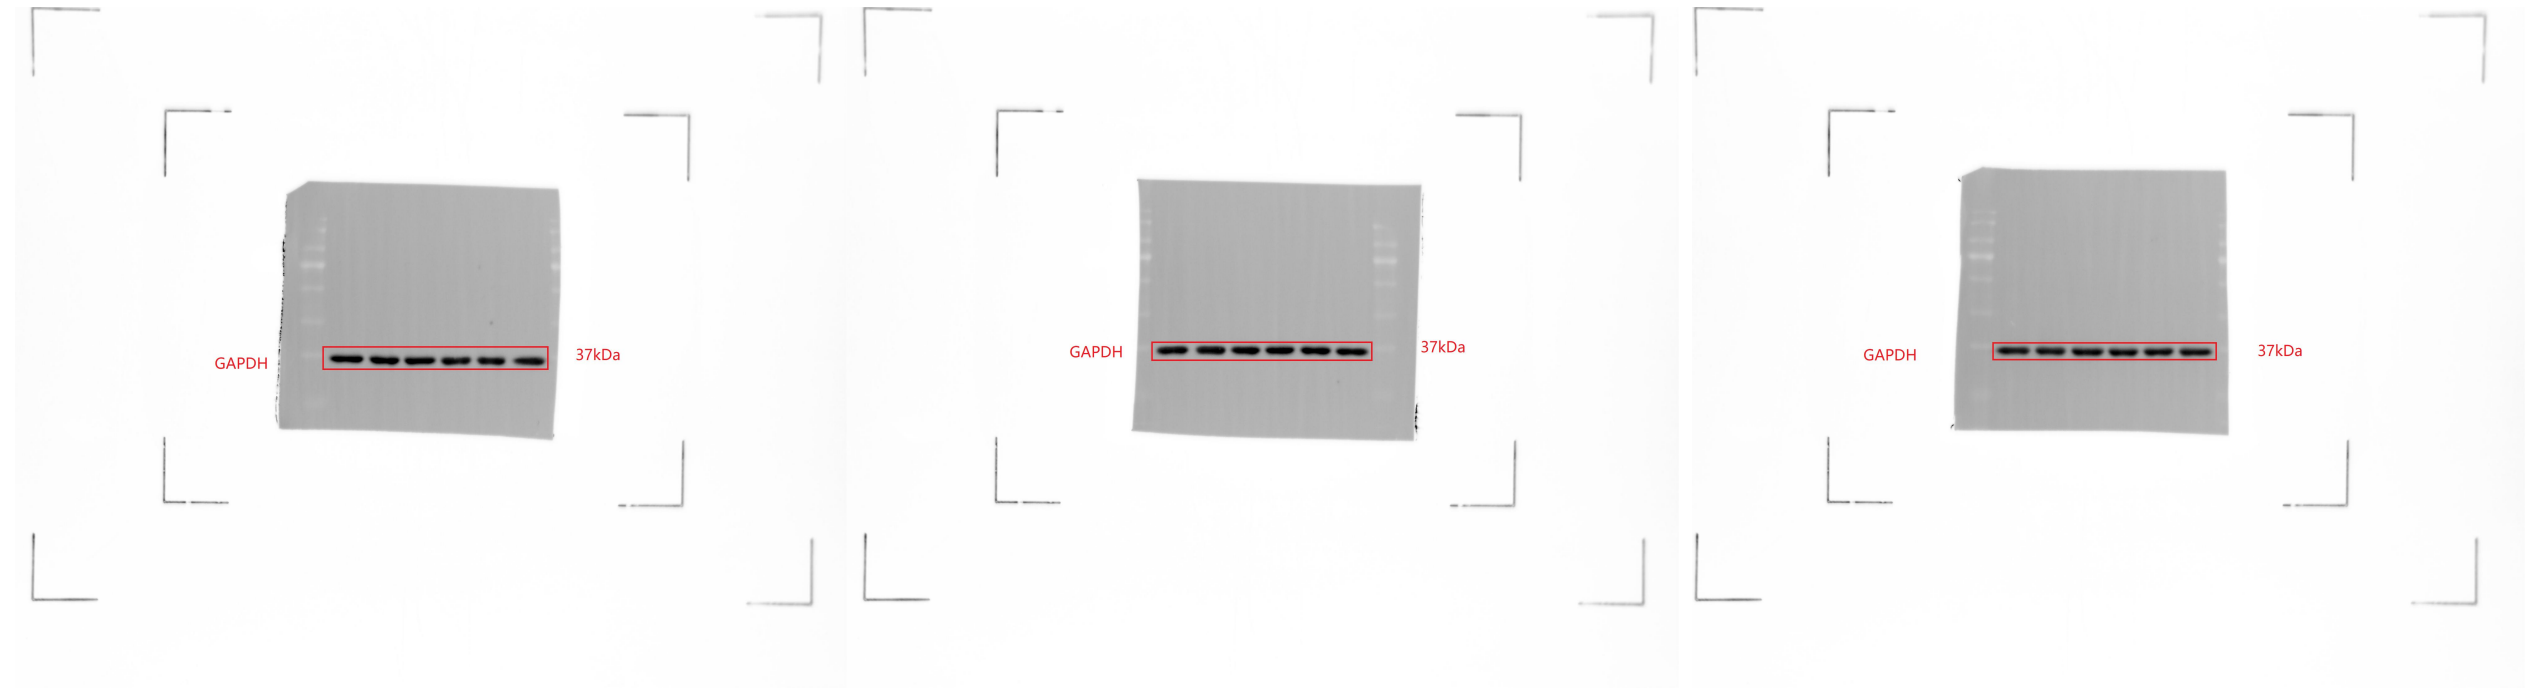

Figure 6C  
The original blot of Bcl-XL in K562 cells

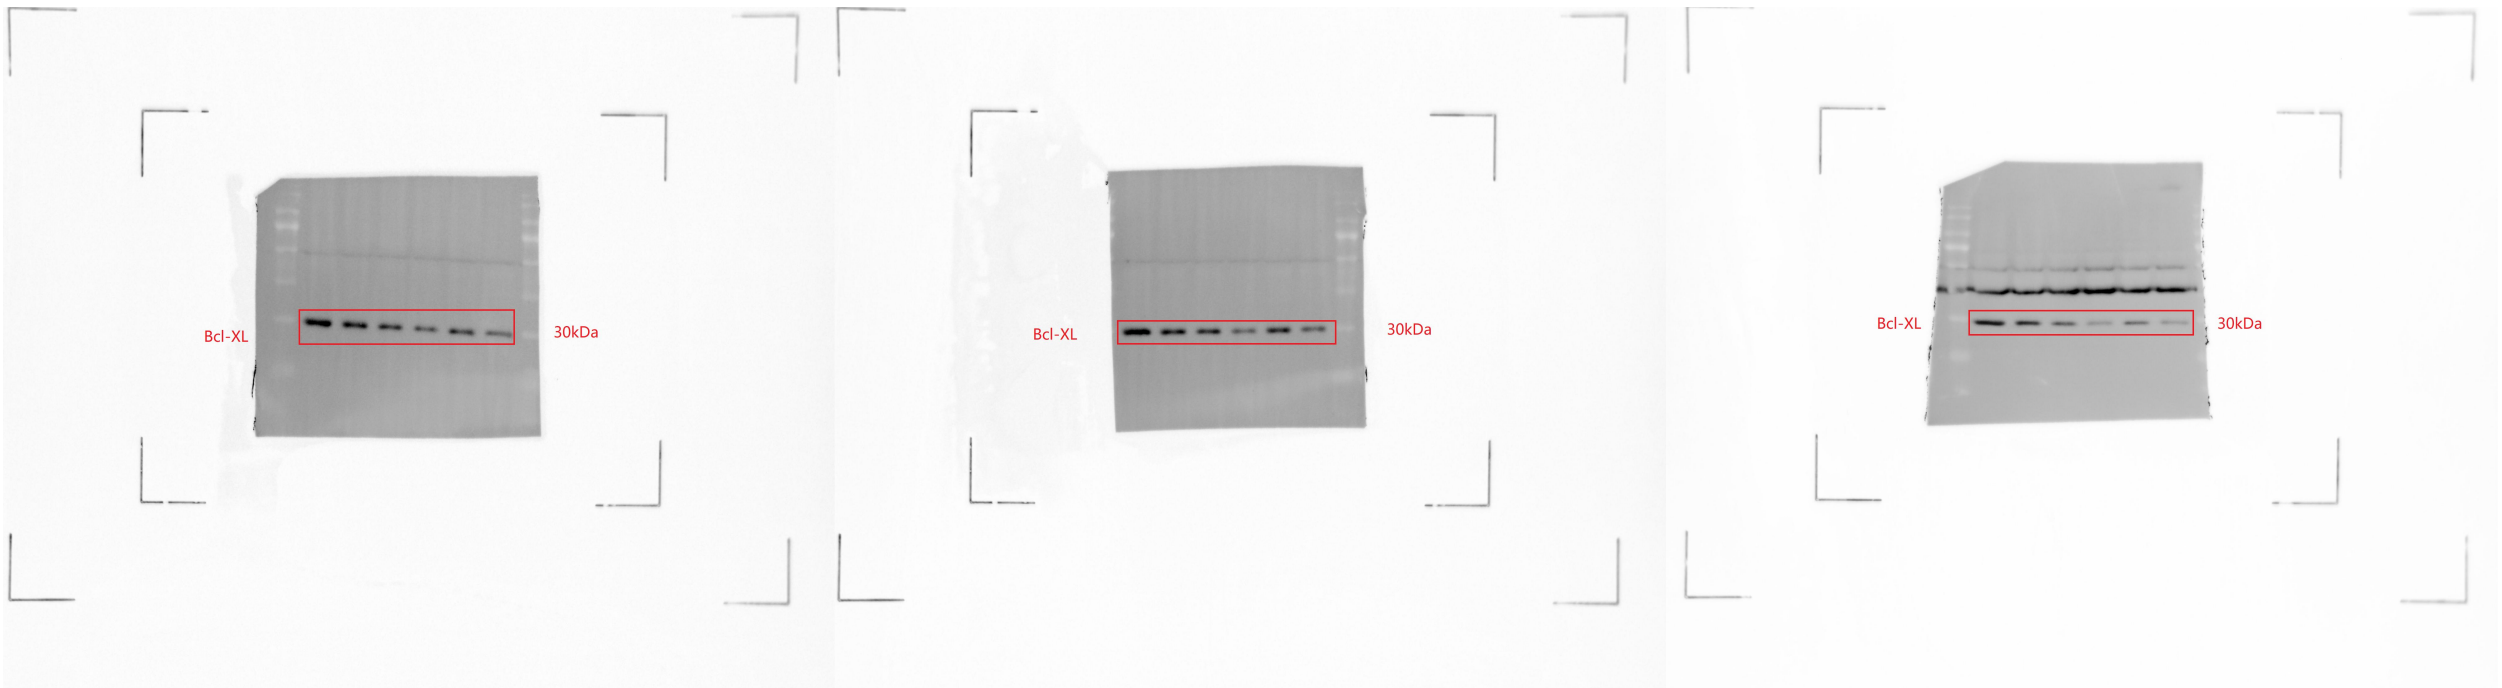

Figure 6C  
The original blot of Bad in K562 cells

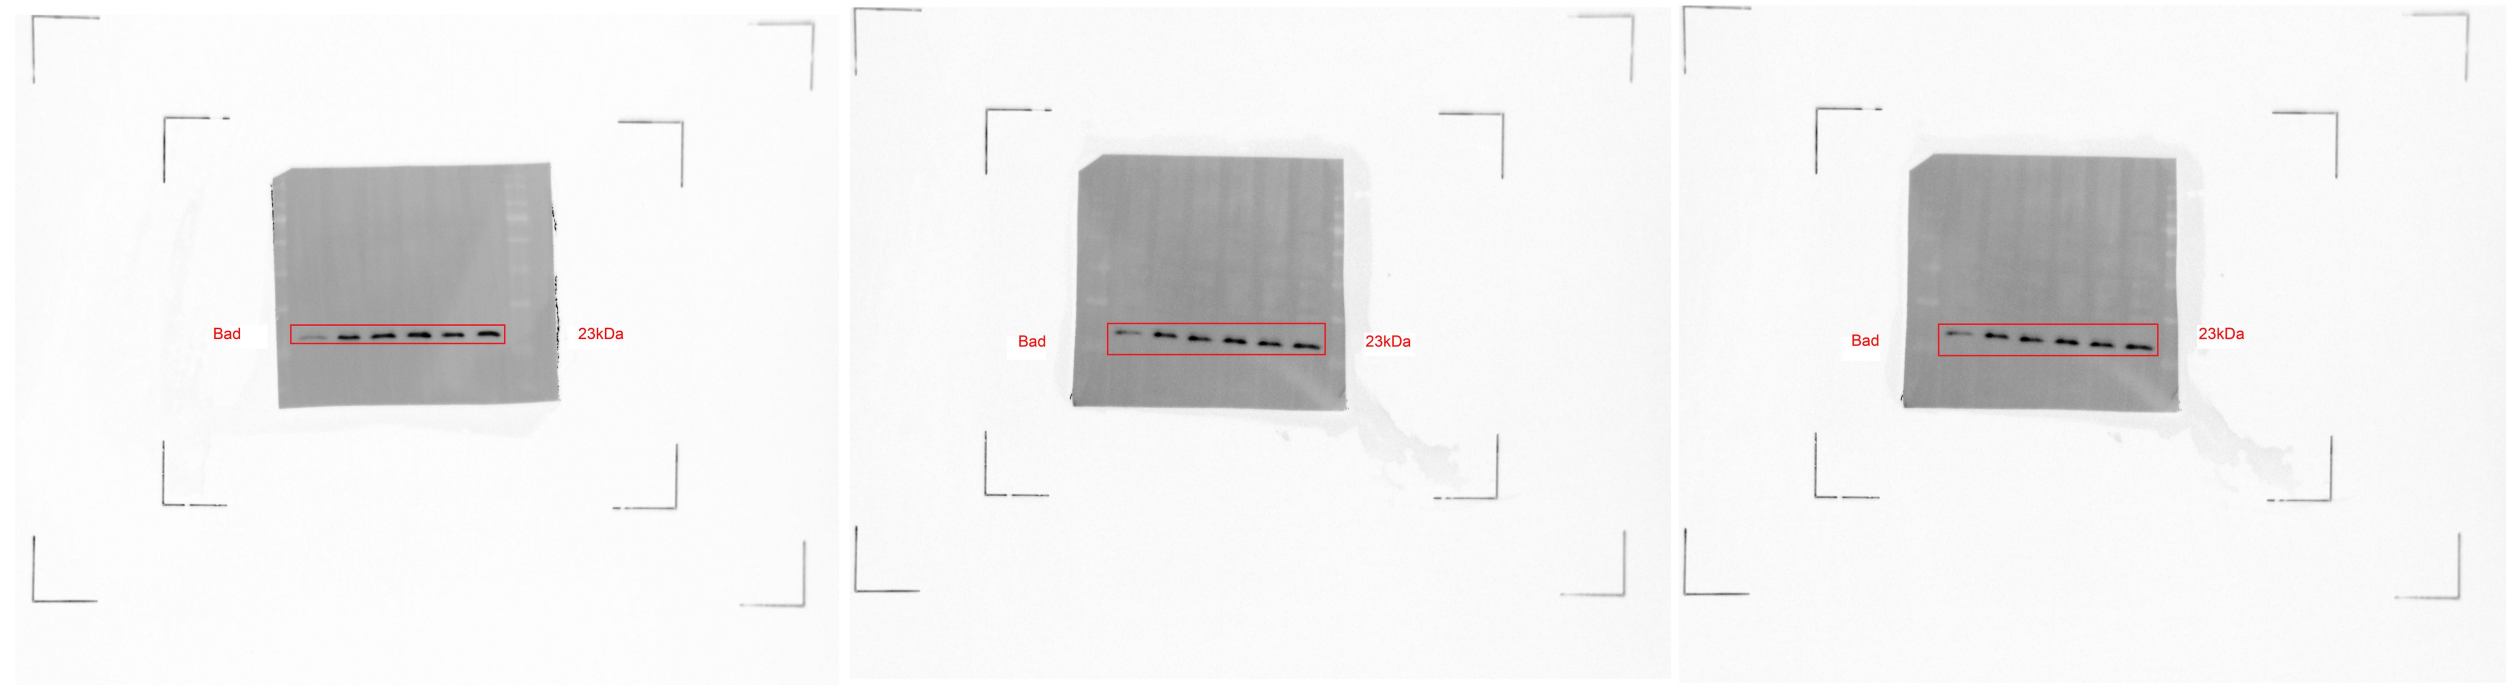

Figure 6C  
The original blot of Survivin in K562 cells

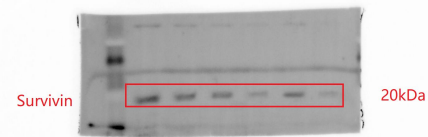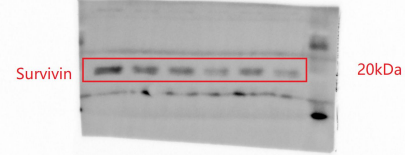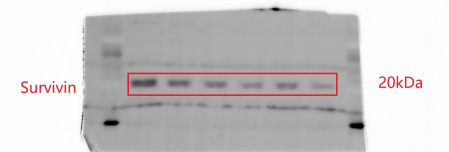

Figure 6C  
The original blot of GAPDH in MEG-01 cells

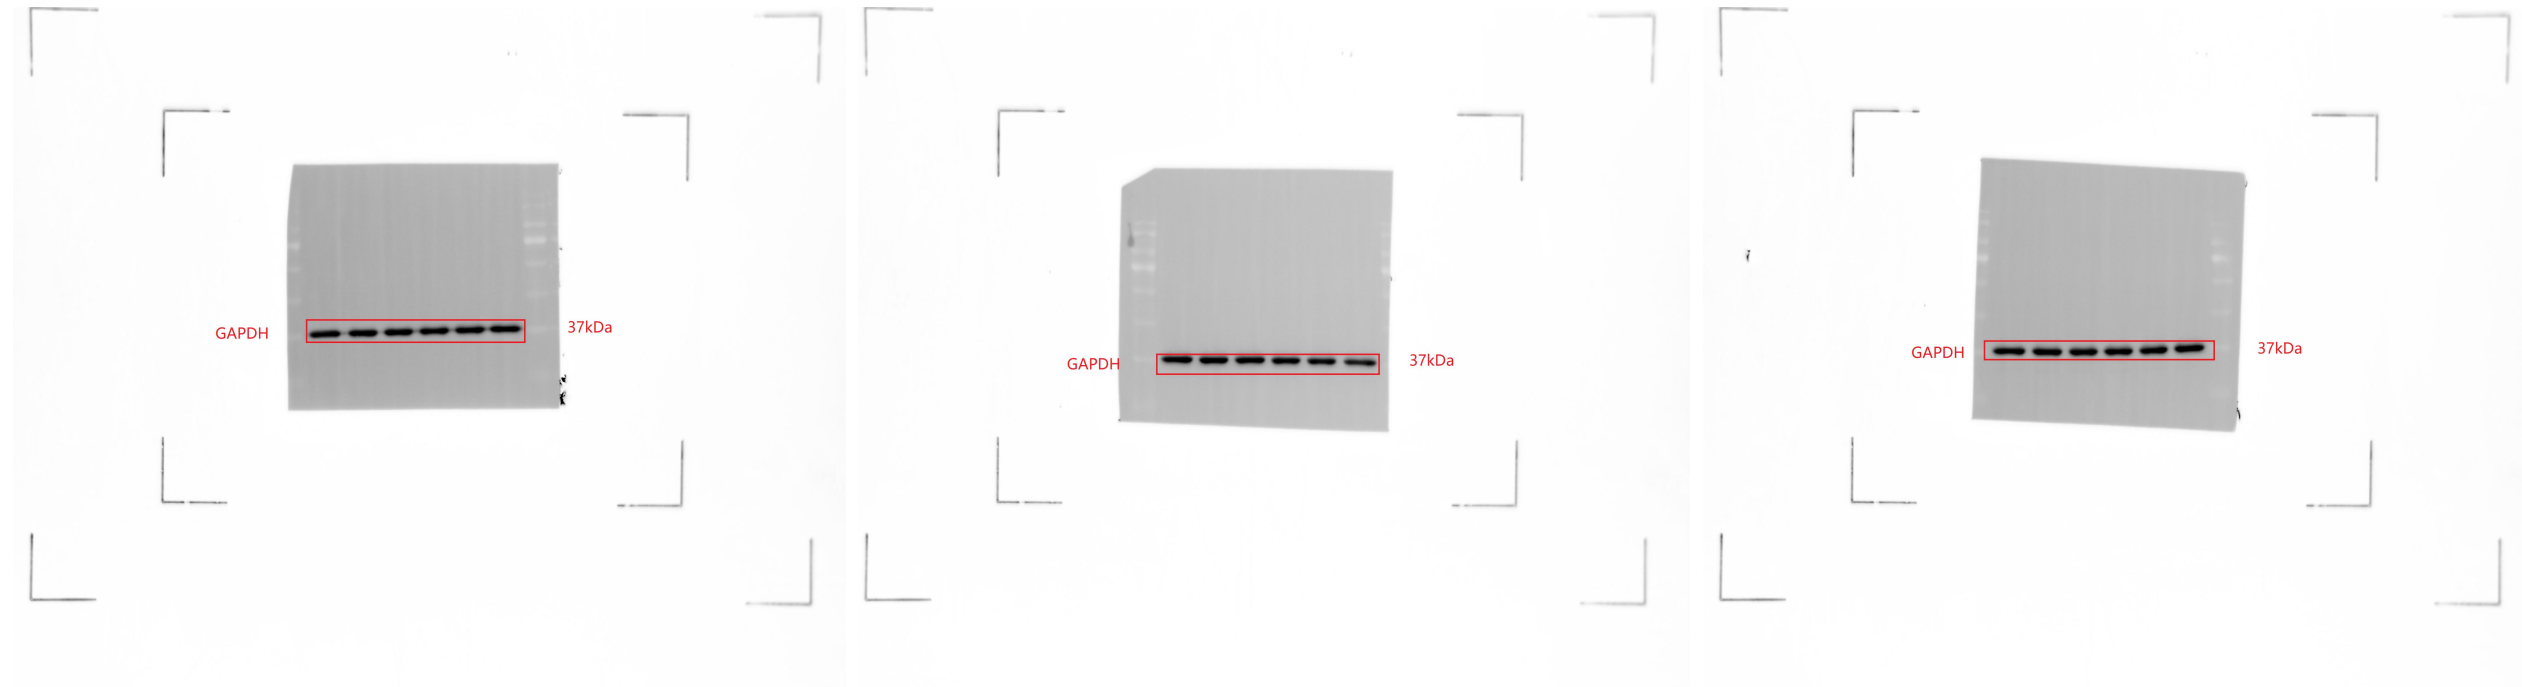

Figure 6C  
The original blot of Bcl-XL in MEG-01 cells

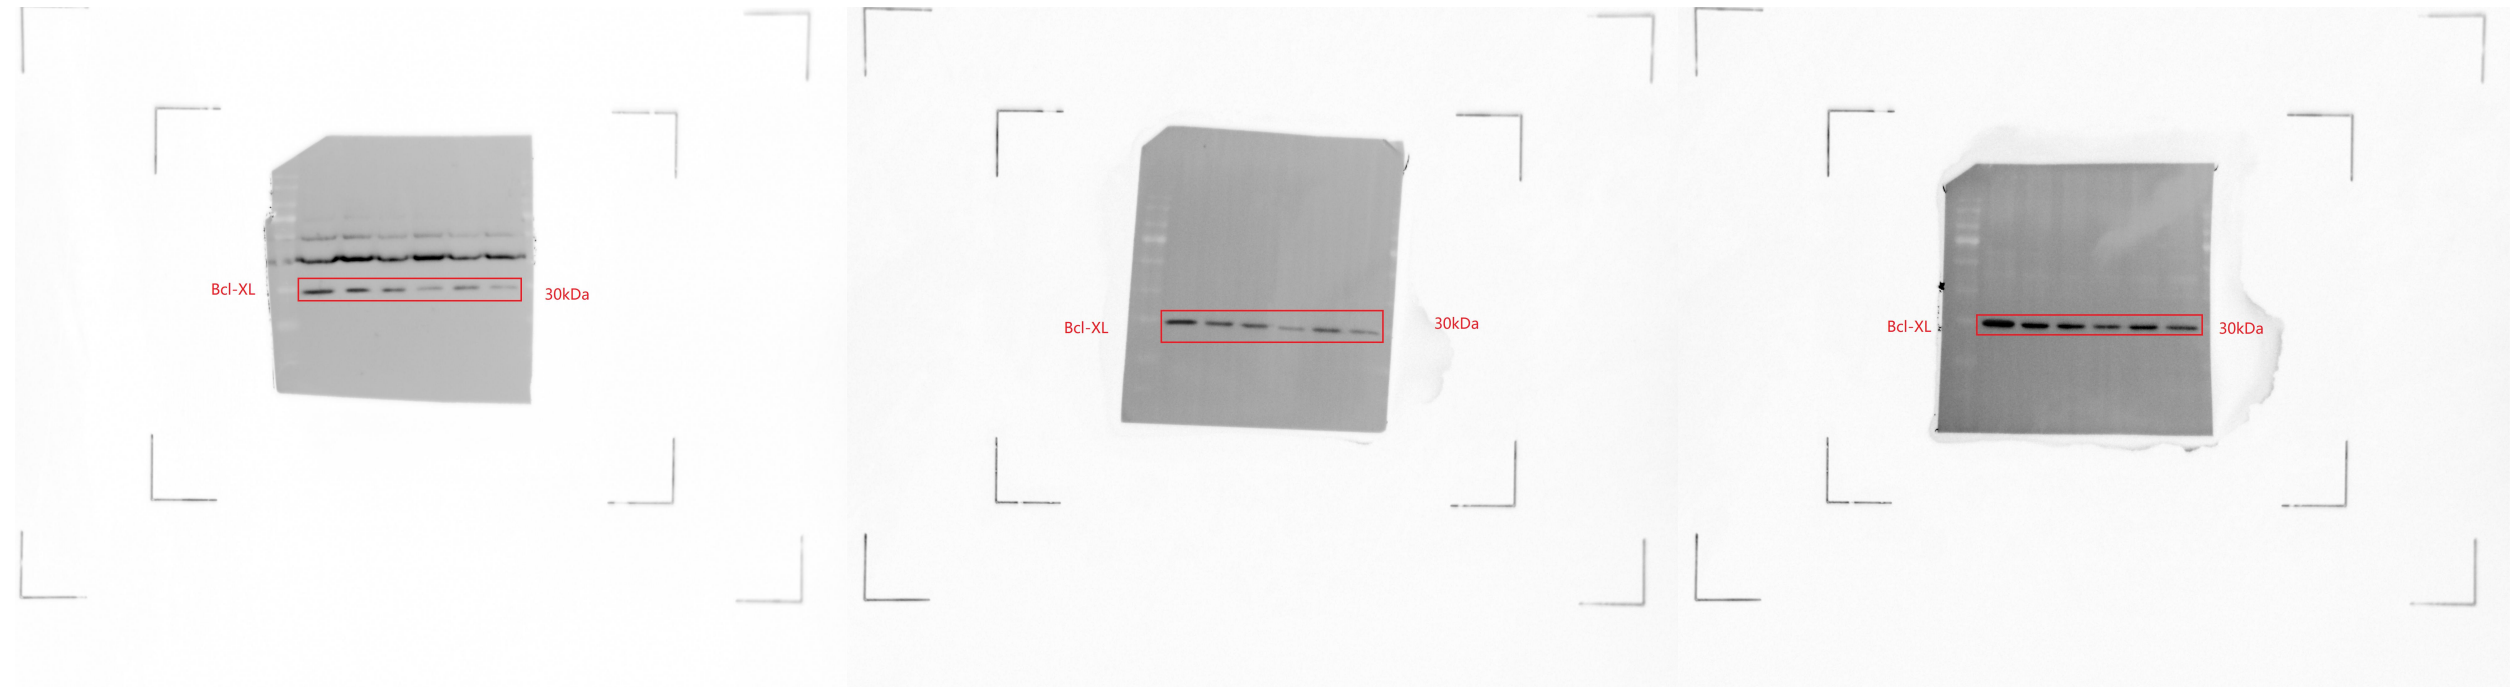



Figure 6C  
The original blot of Bad in MEG-01 cells

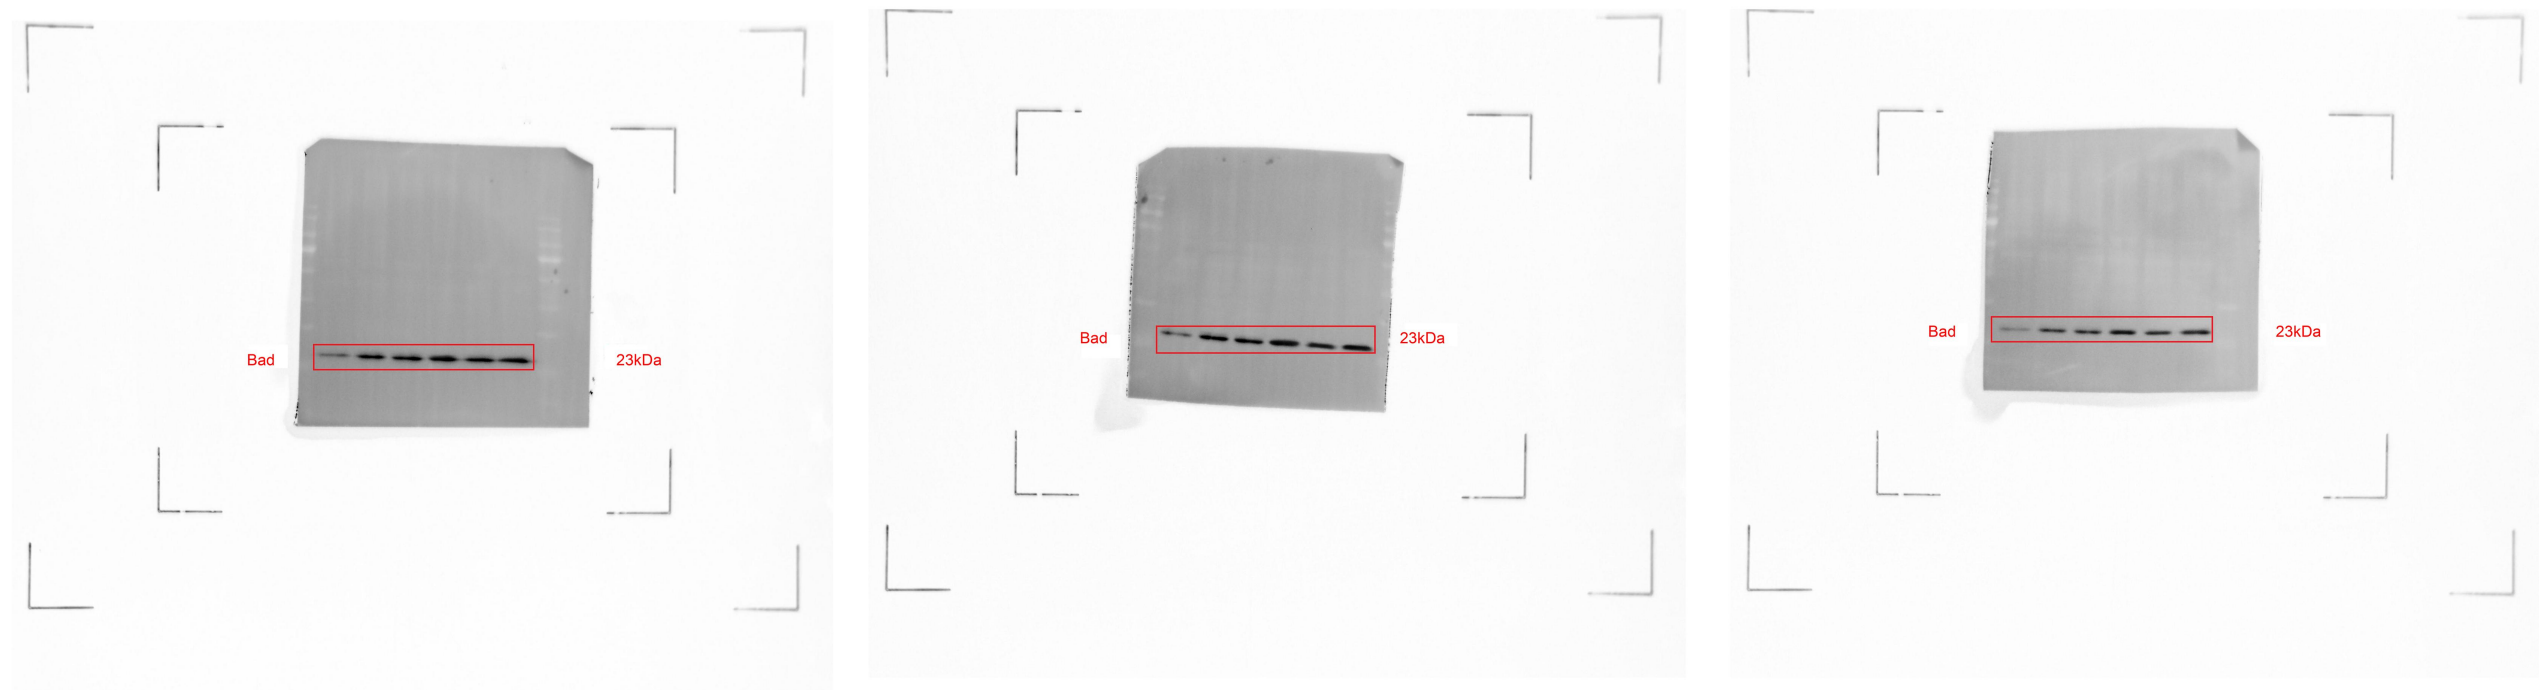

Figure 6C  
The original blot of Survivin in MEG-01 cells

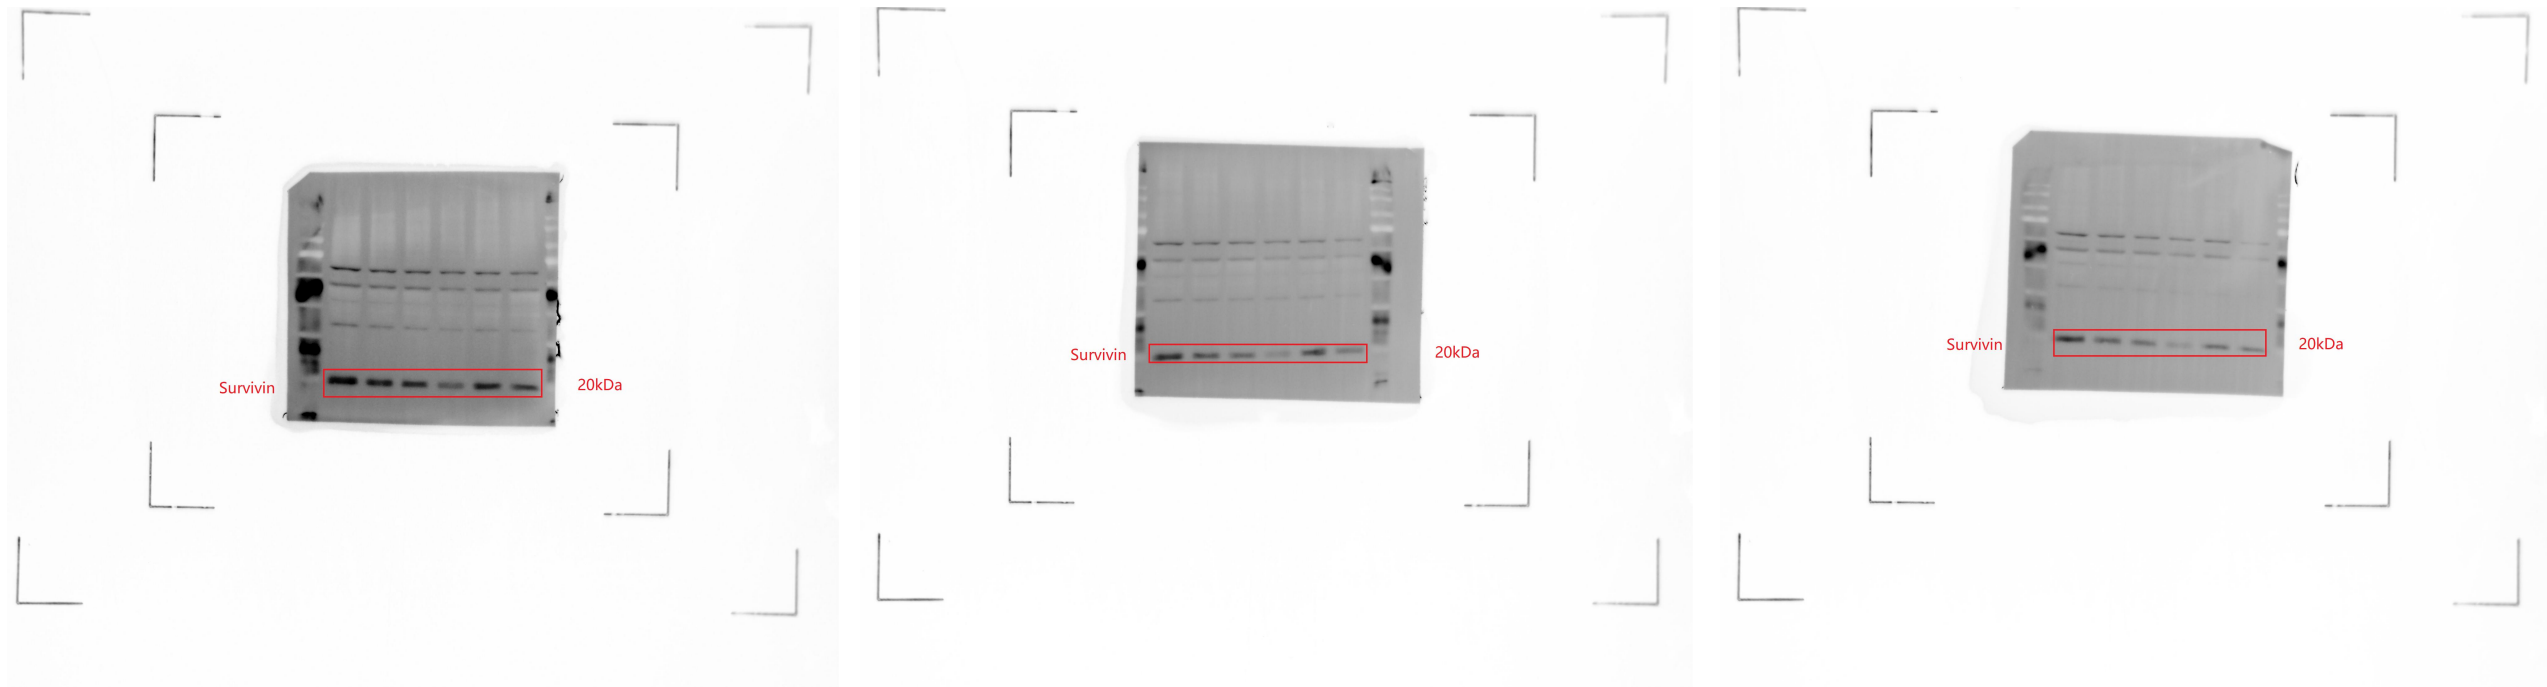

Figure 7B  
The original blot of GAPDH in K562 cells

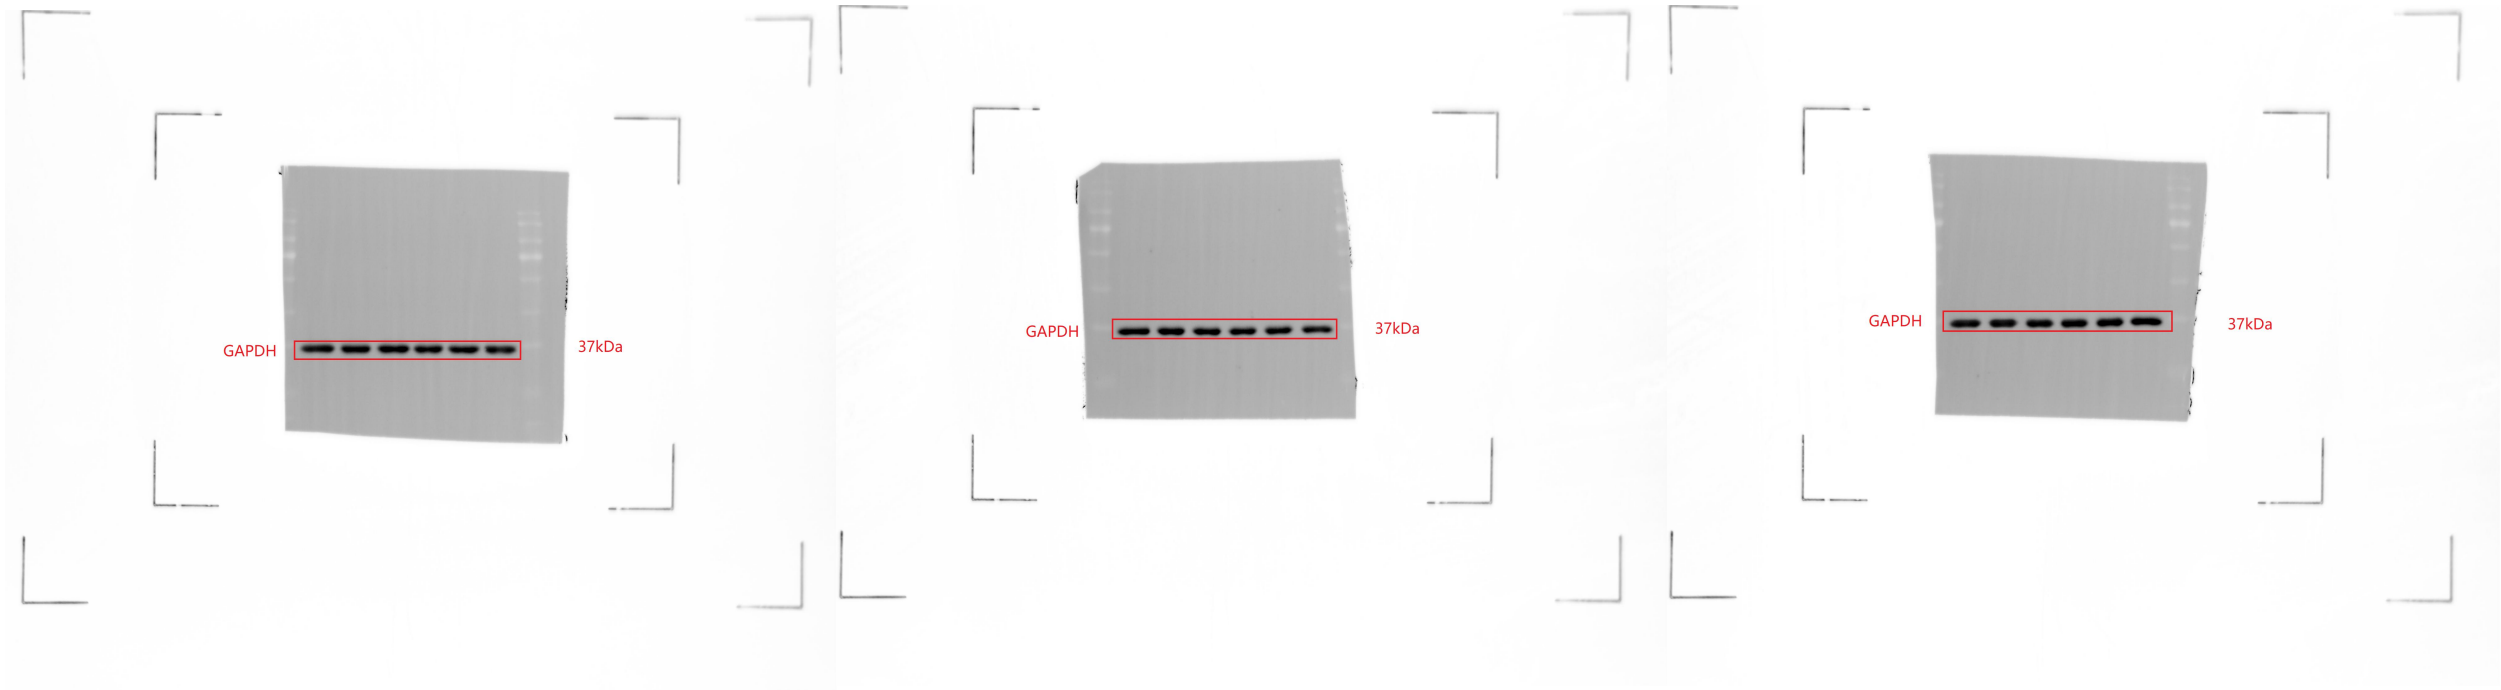

Figure 7B

The original blot of hTERT in K562 cells

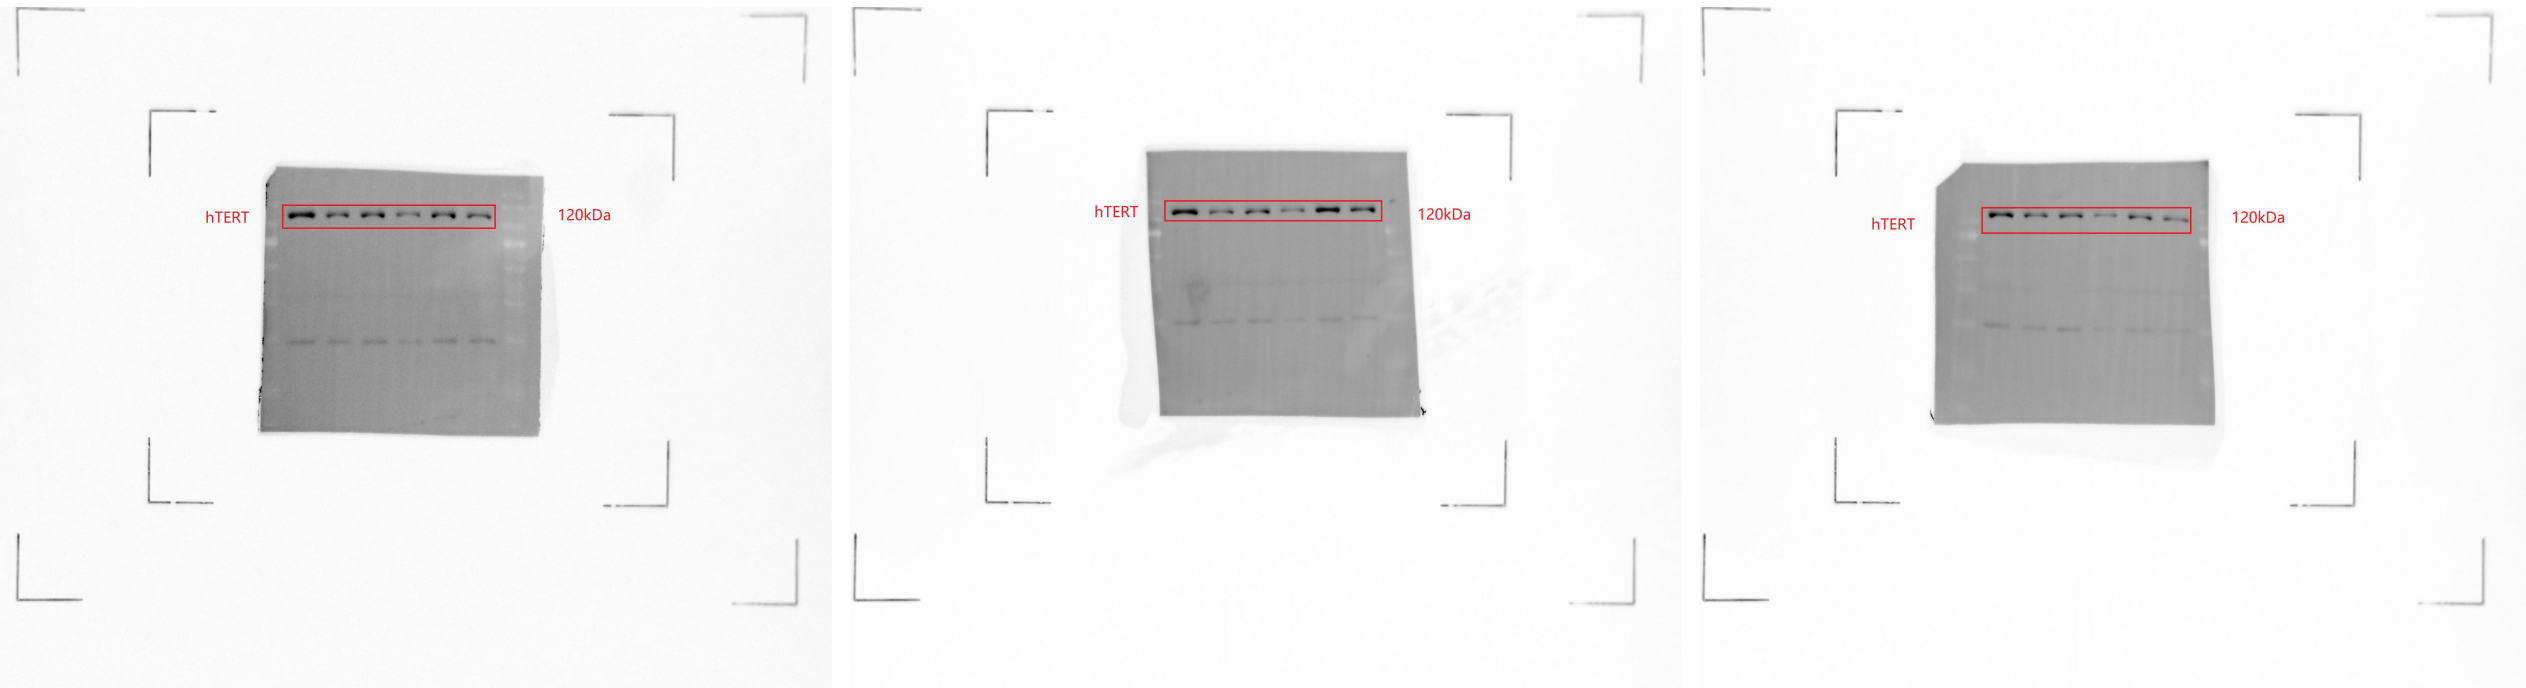

Figure 7B  
The original blot of C-MYC in K562 cells

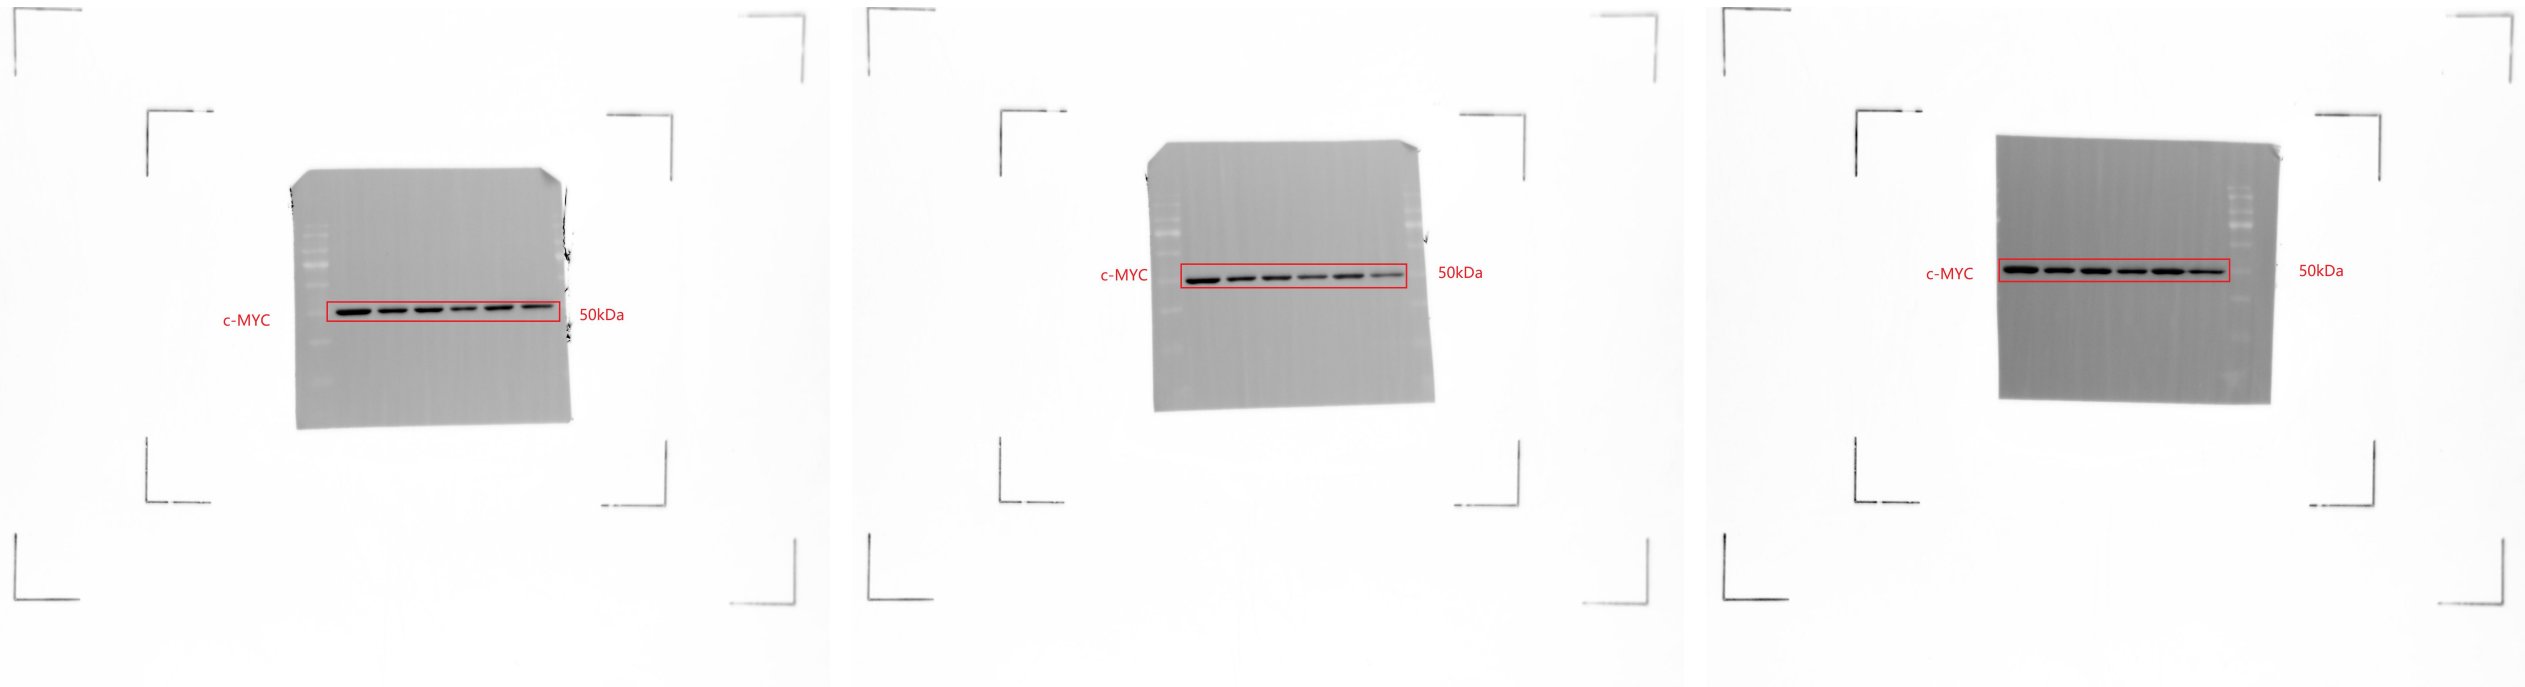

Figure 7B  
The original blot of GAPDH in MEG-01 cells

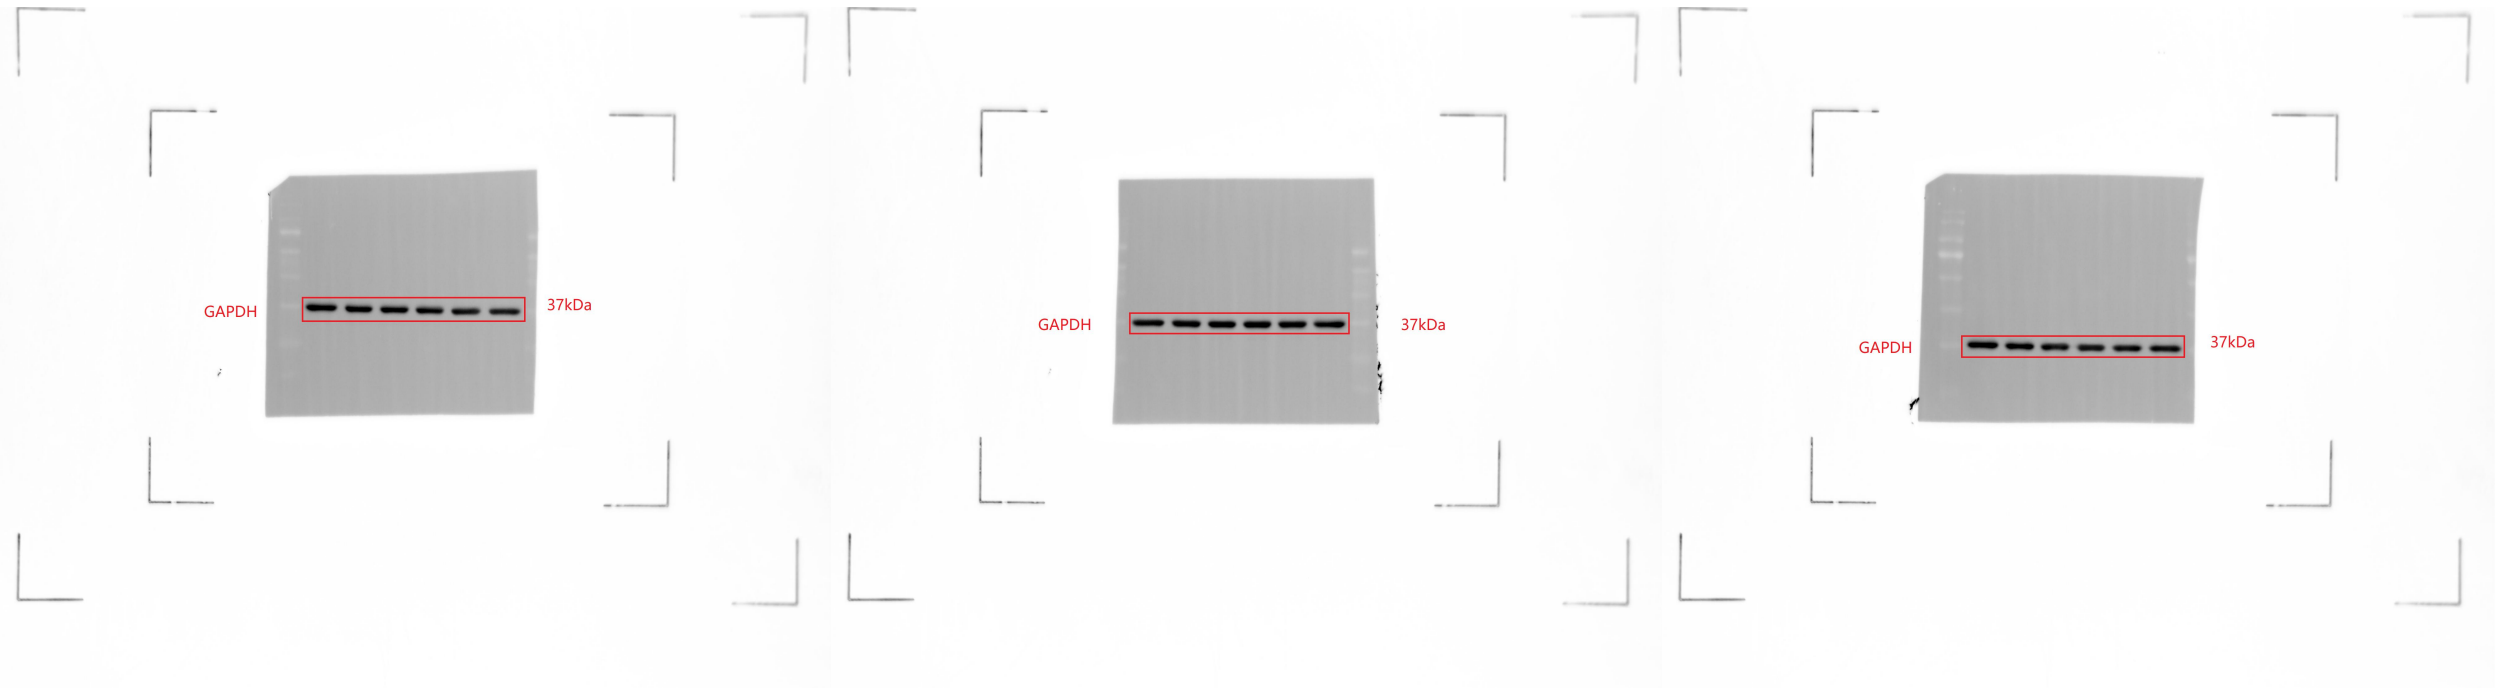

Figure 7B

The original blot of hTERT in MEG-01 cells

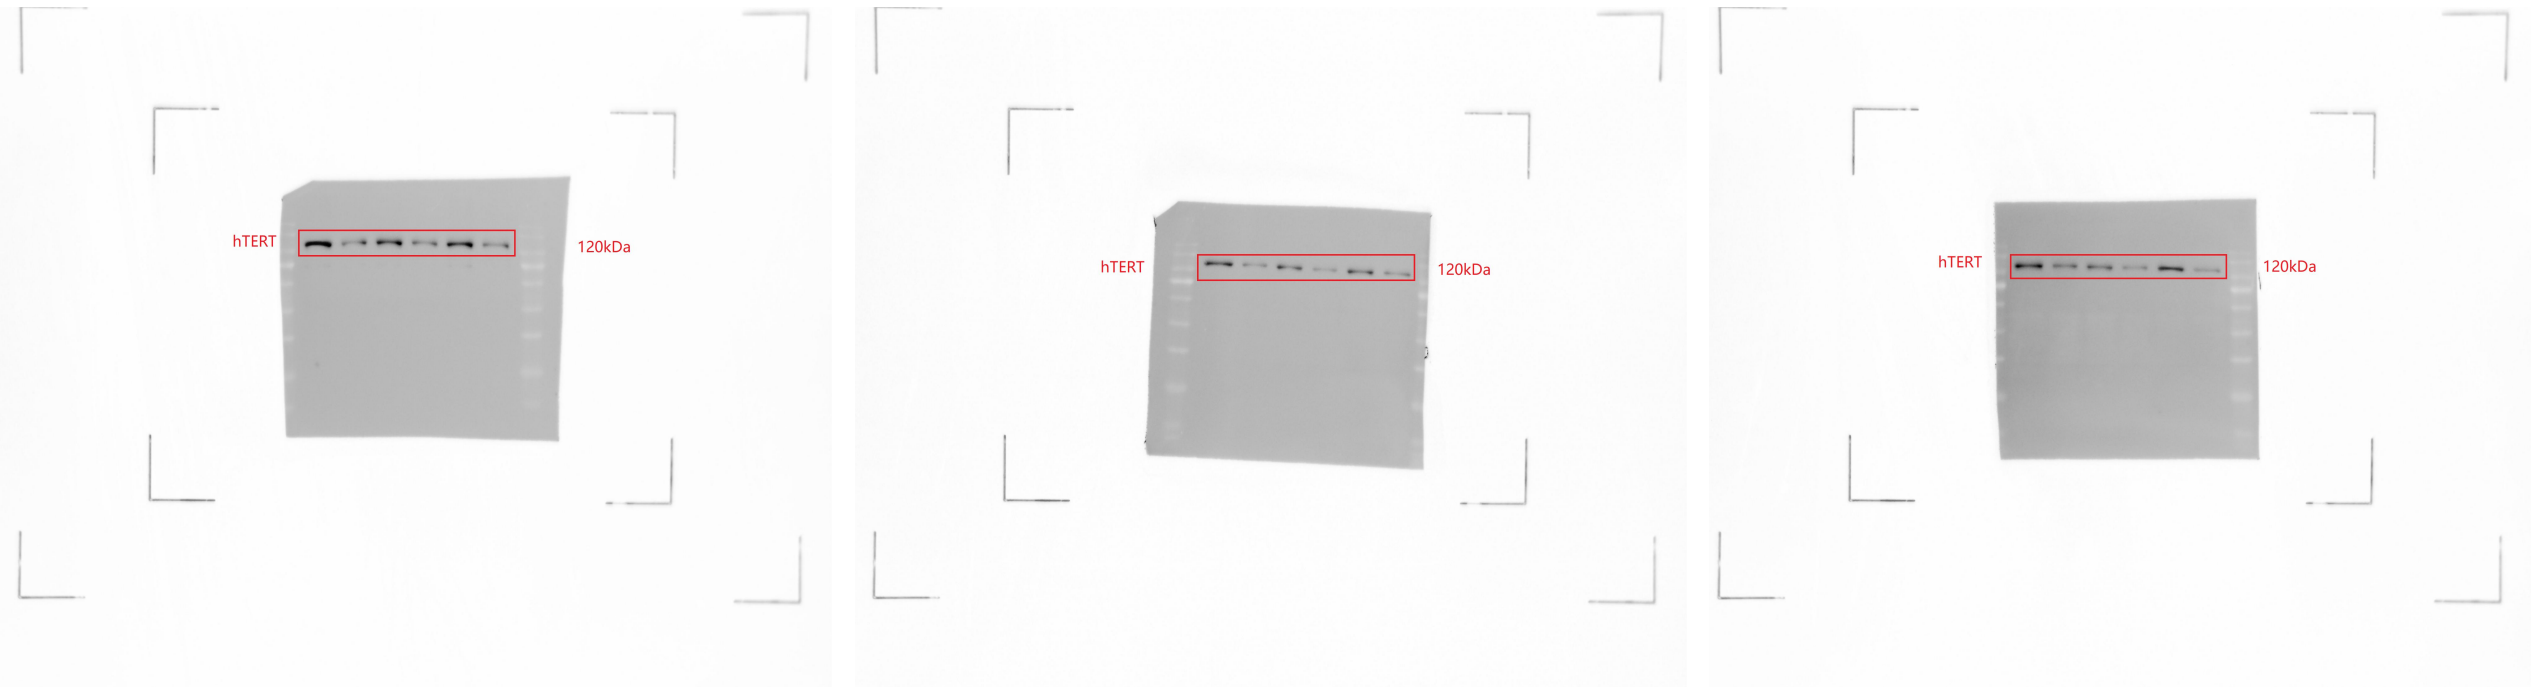

Figure 7B

The original blot of c-MYC in MEG-01 cells

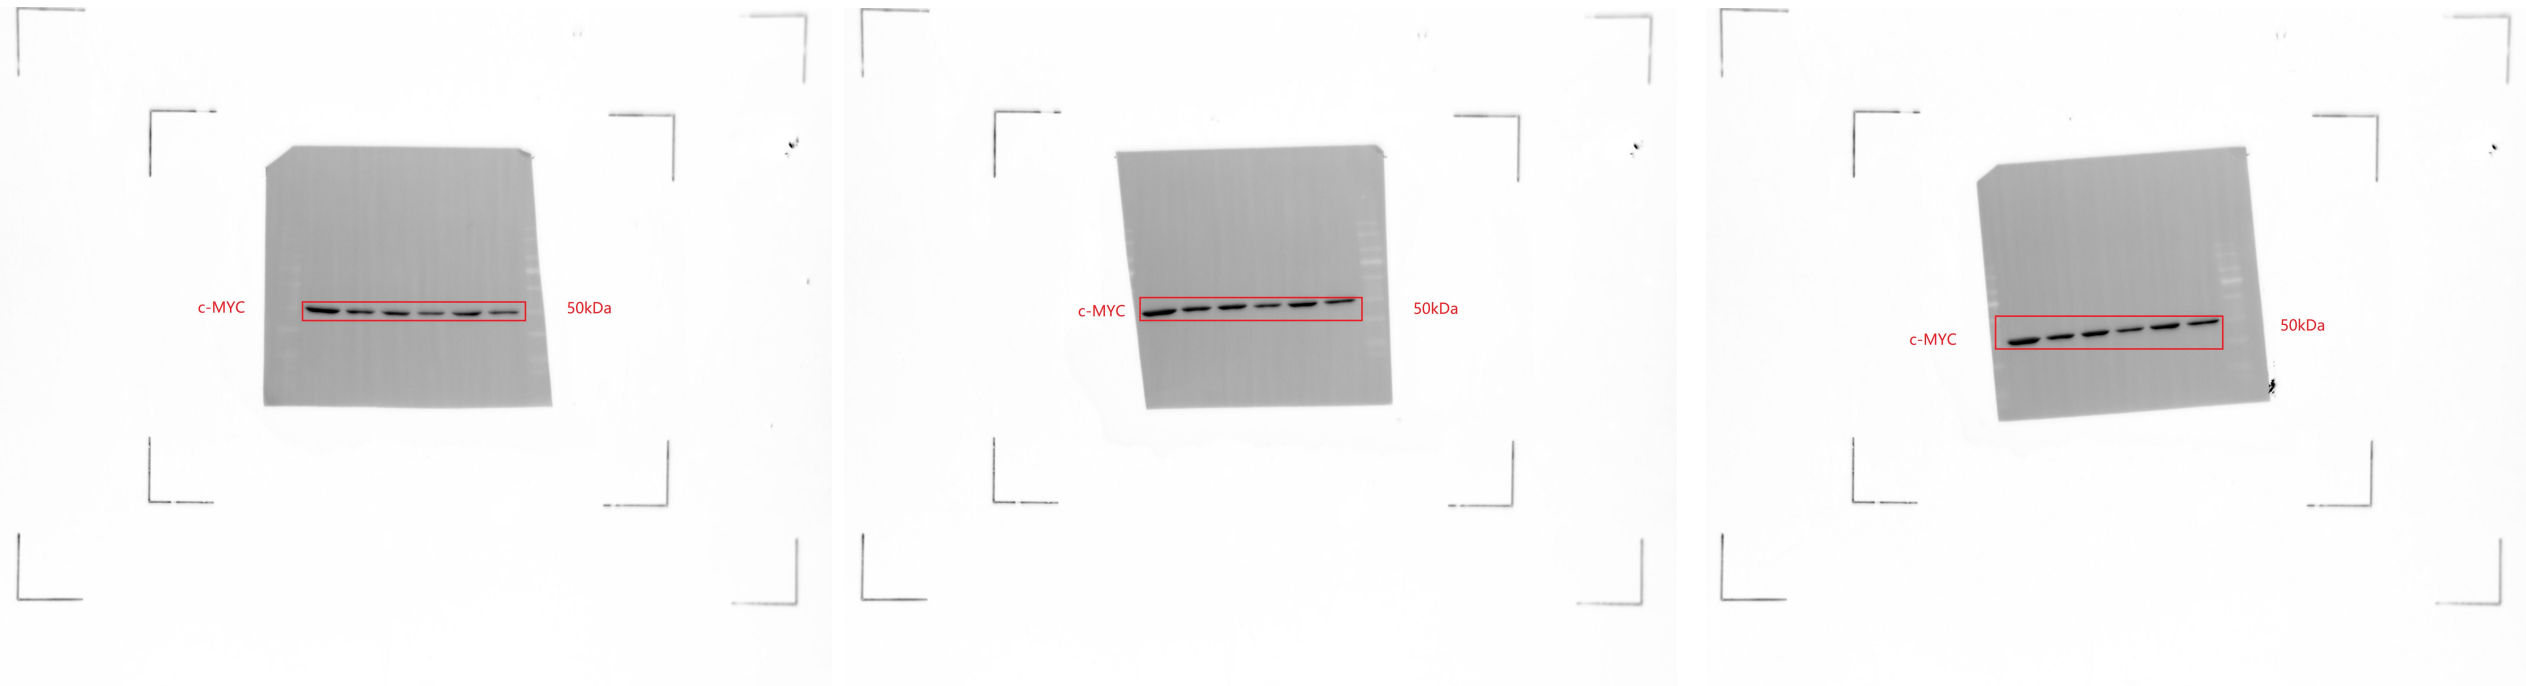



Figure 8A  
The original blot of GAPDH in K562 cells

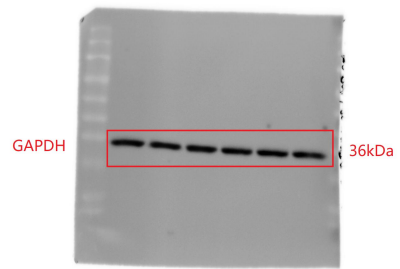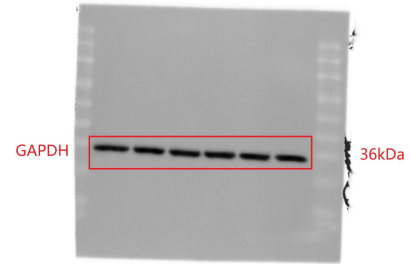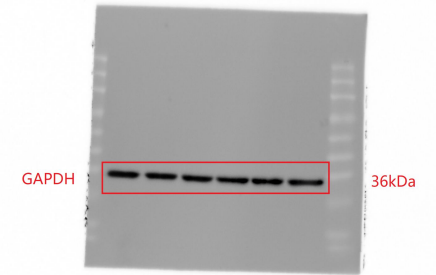

Figure 8A  
The original blot of PI3K in K562 cells

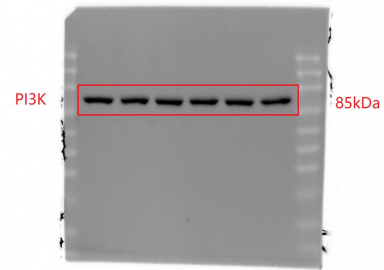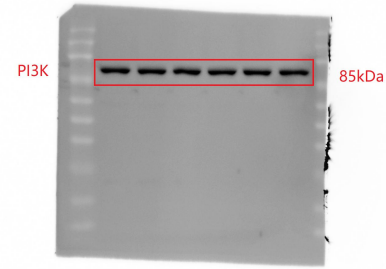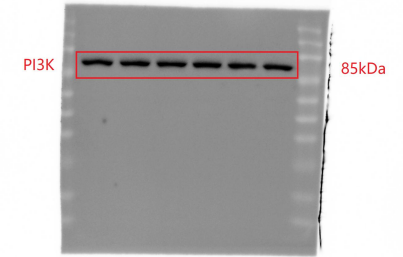

Figure 8A  
The original blot of p-PI3K in K562 cells

p-PI3K

80kDa

p-PI3K

80kDa

p-PI3K

80kDa

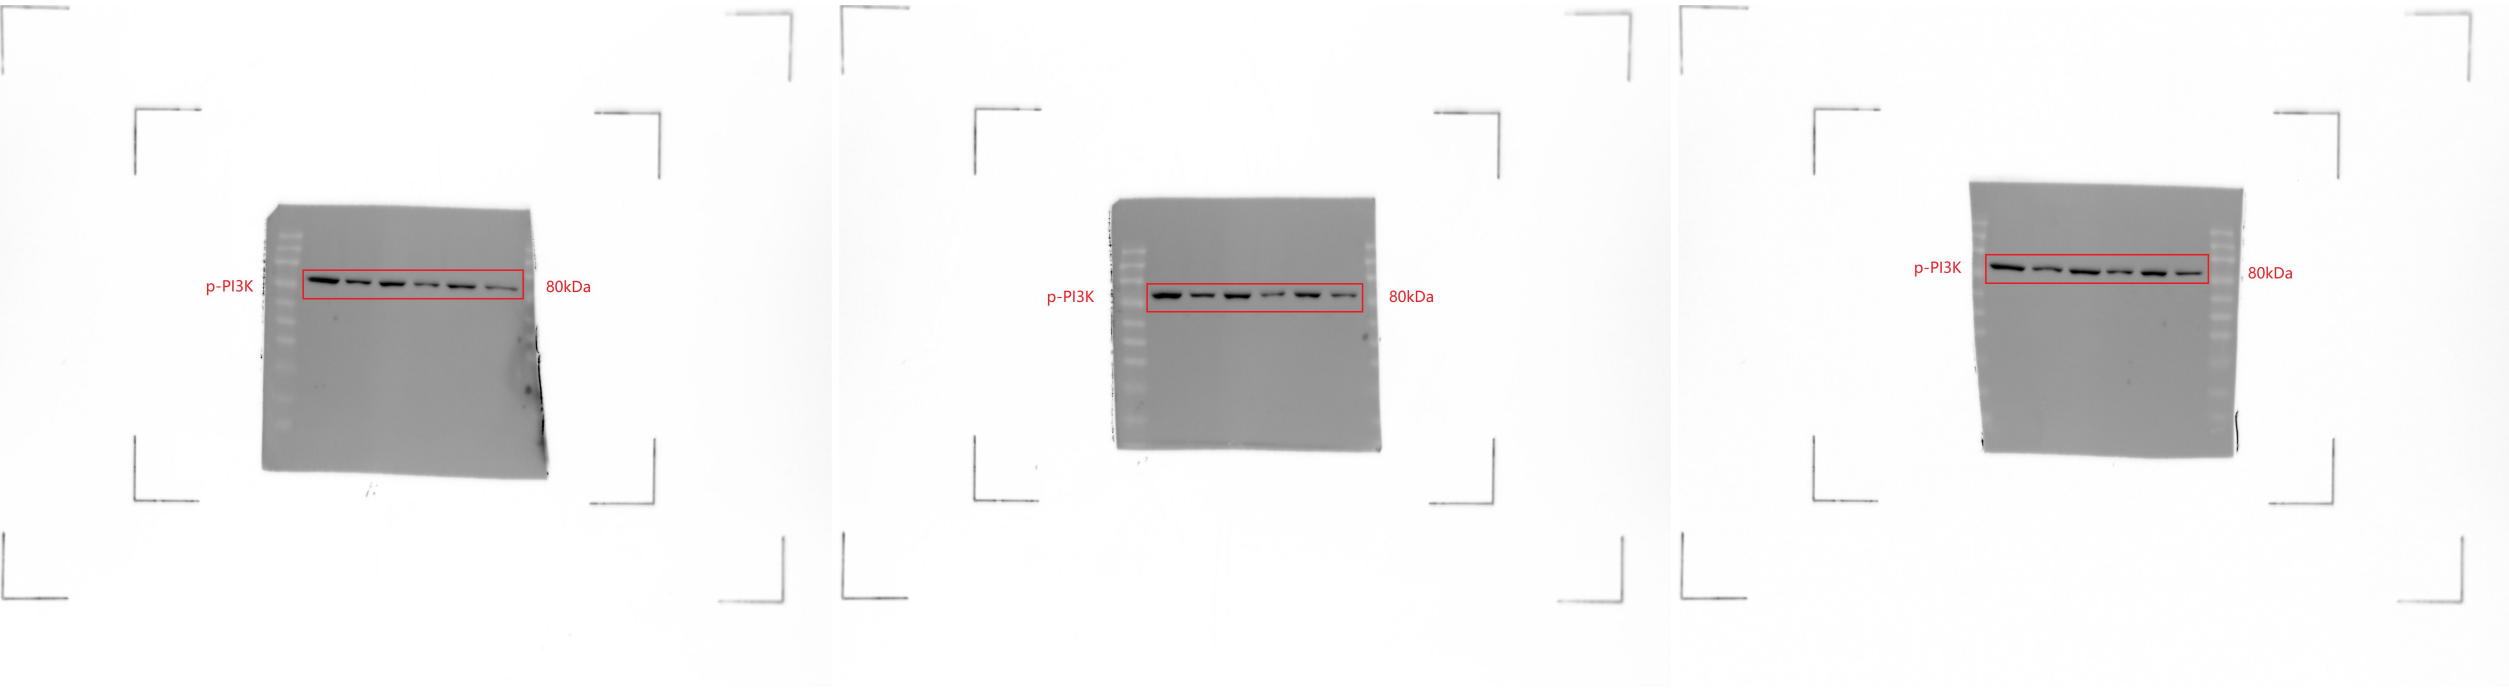

Figure 8A  
The original blot of GAPDH in K562 cells

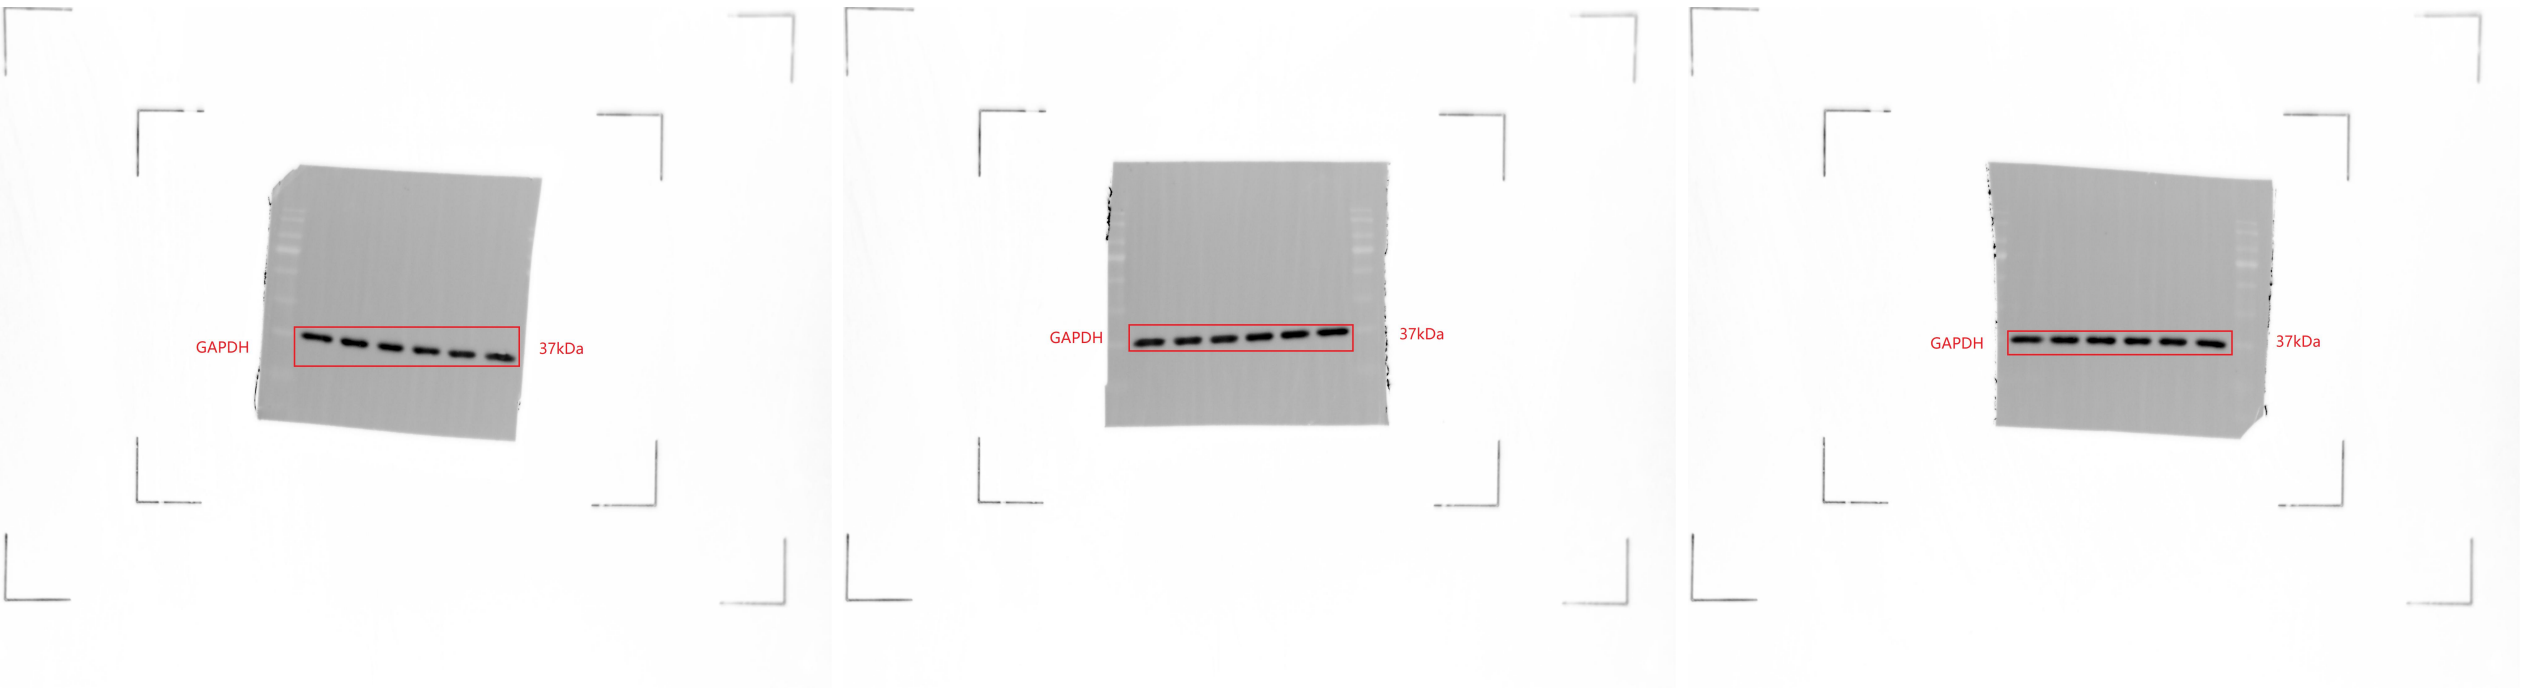

Figure 8A  
The original blot of AKT in K562 cells

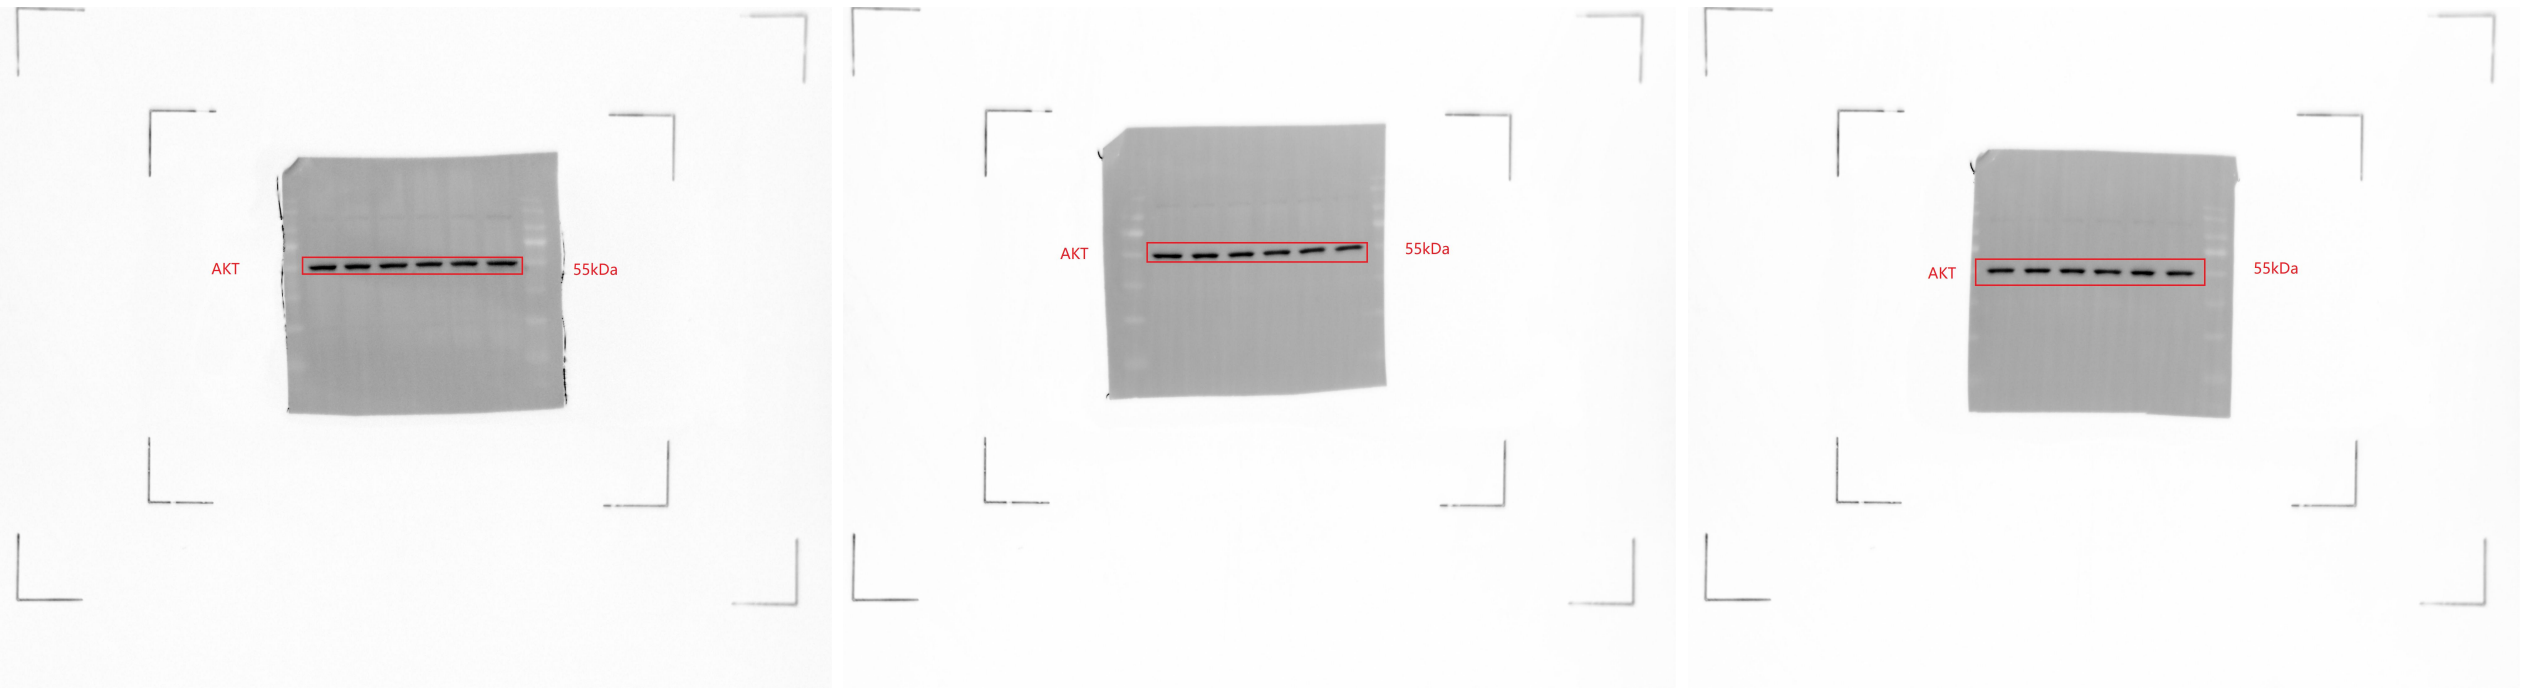

Figure 8A  
The original blot of P-AKT in K562 cells

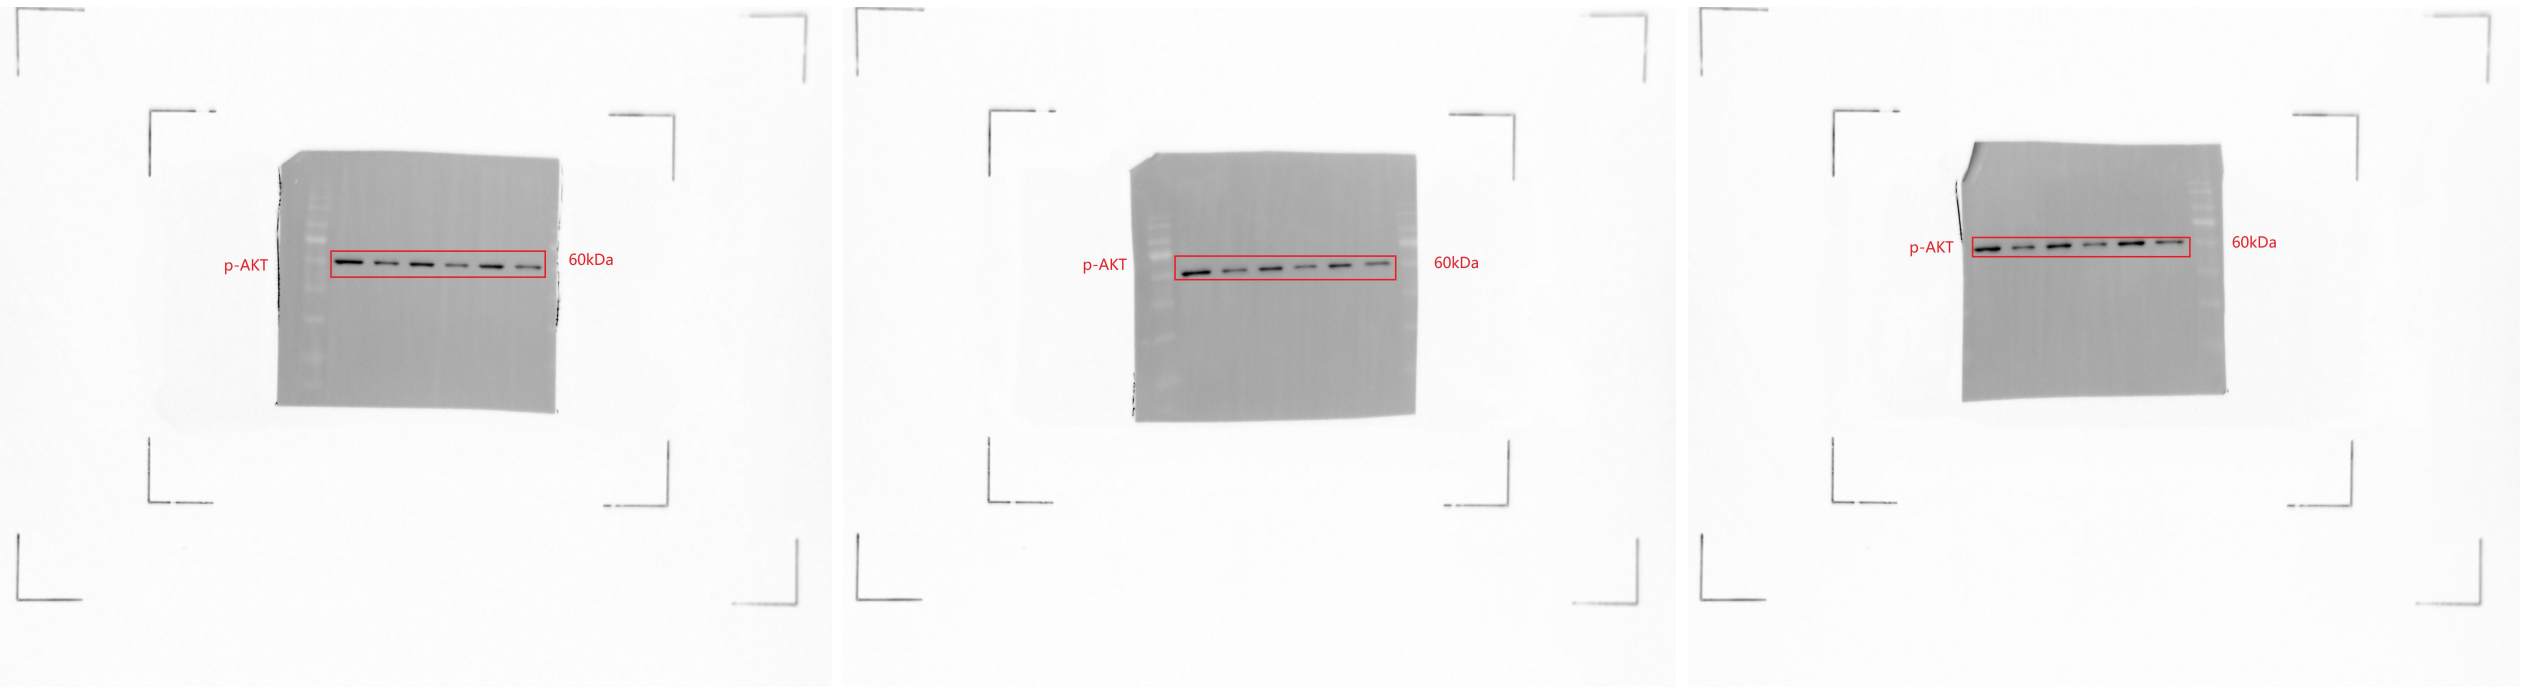

Figure 8A  
The original blot of mTOR in K562 cells

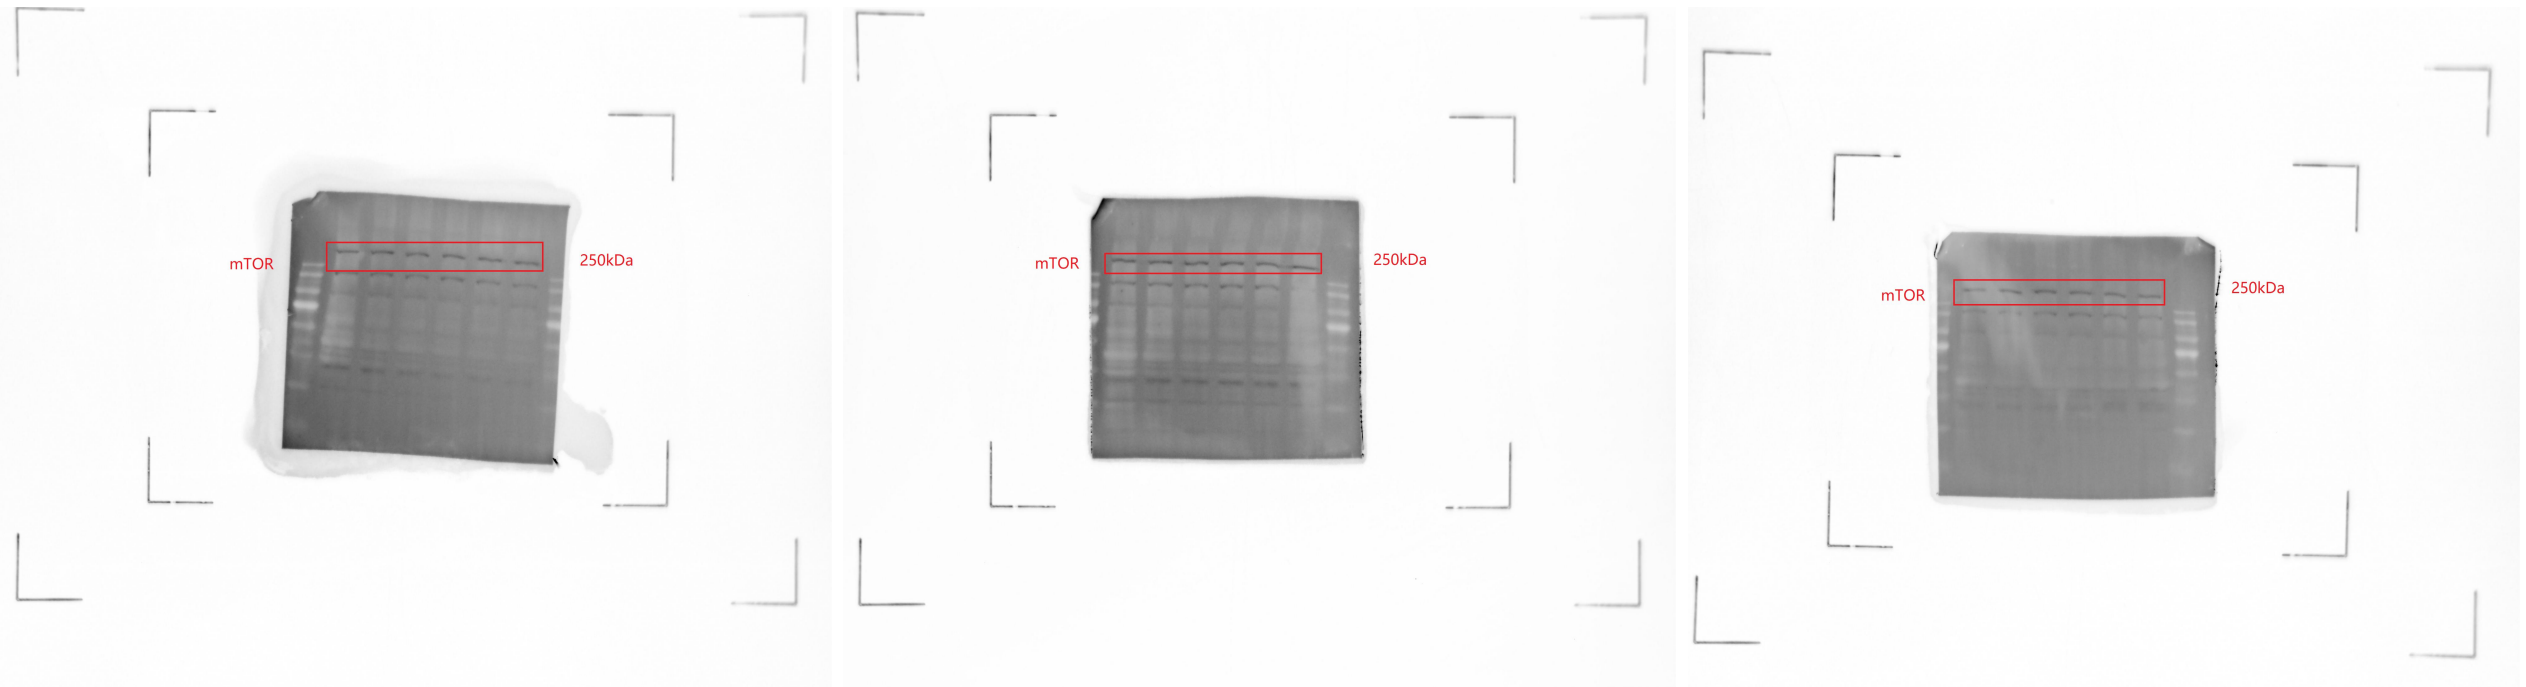

Figure 8A  
The original blot of P-mTOR in K562 cells

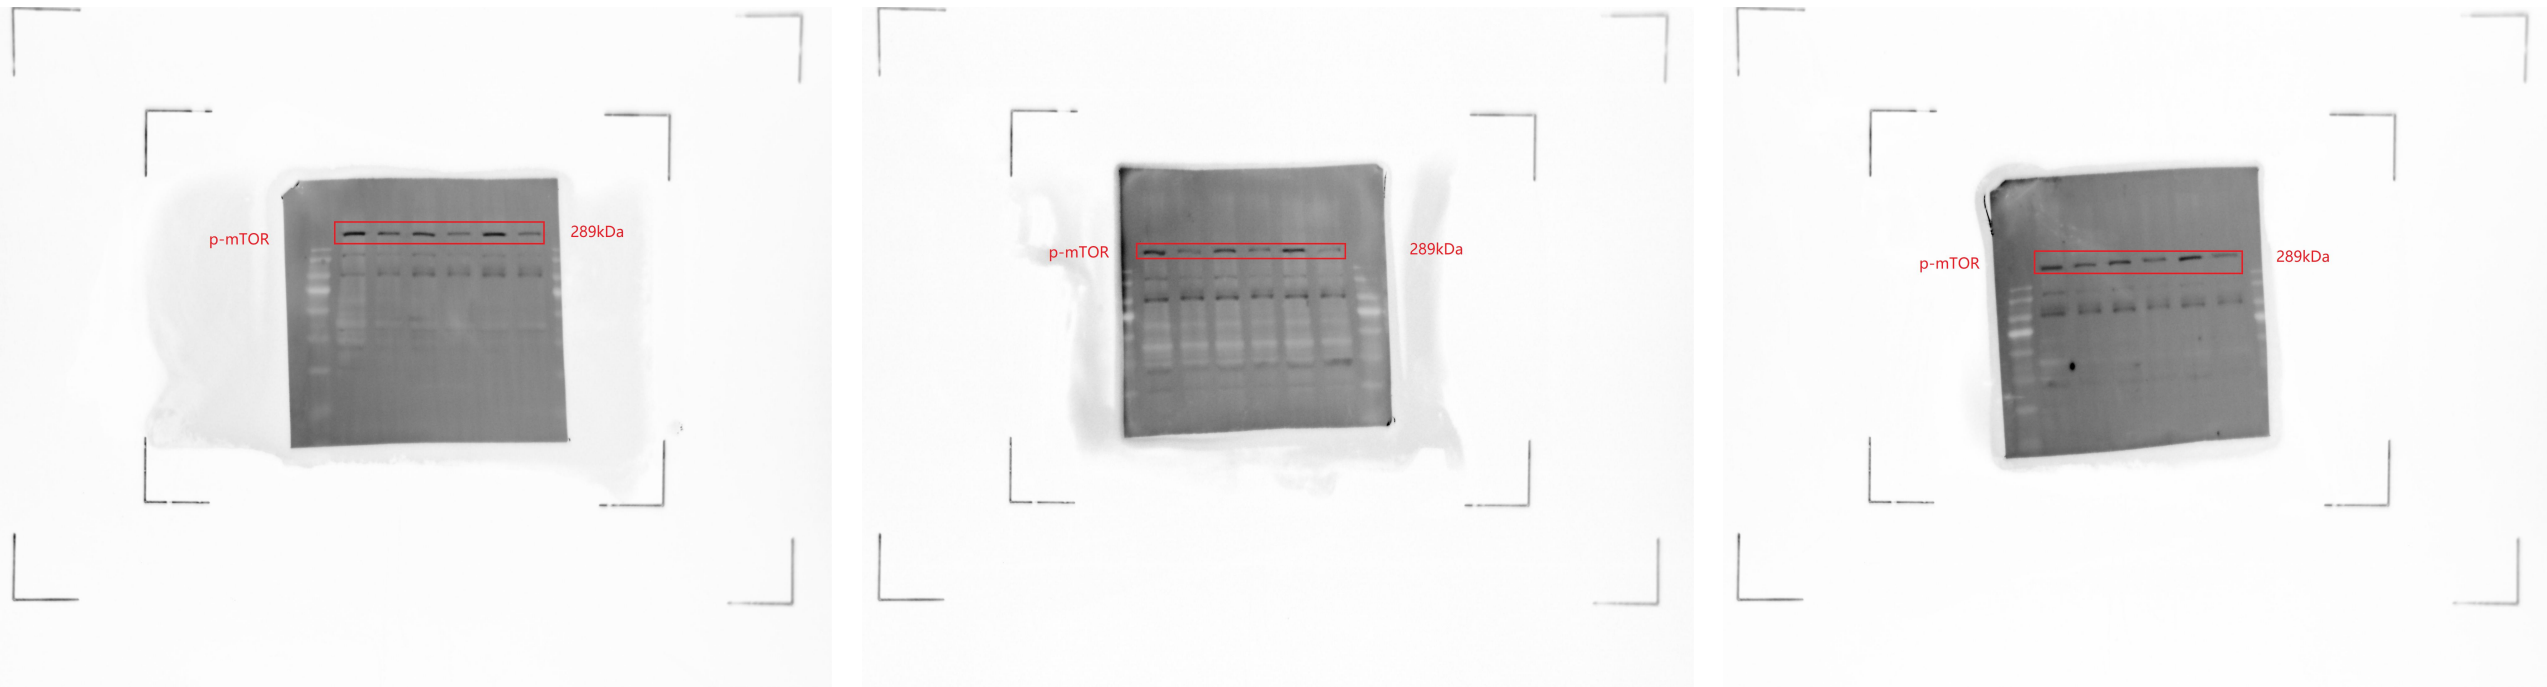



Figure 8A  
The original blot of ERK in K562 cells

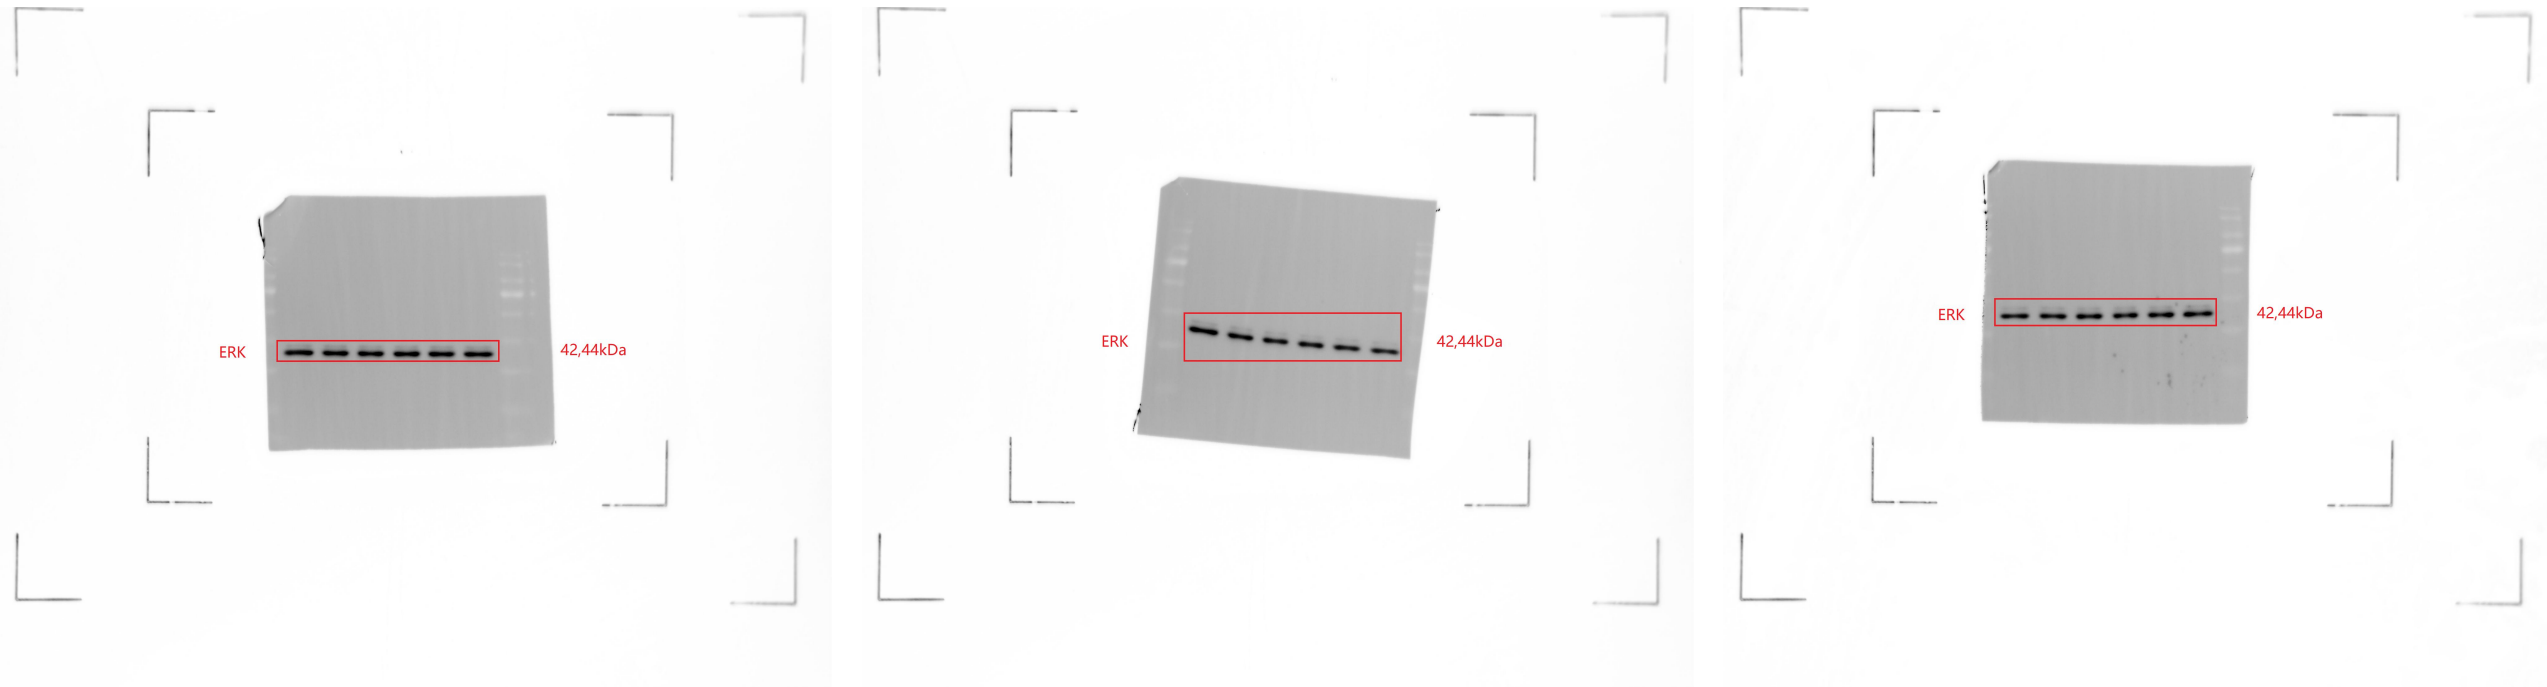

Figure 8A  
The original blot of p-ERK in K562 cells

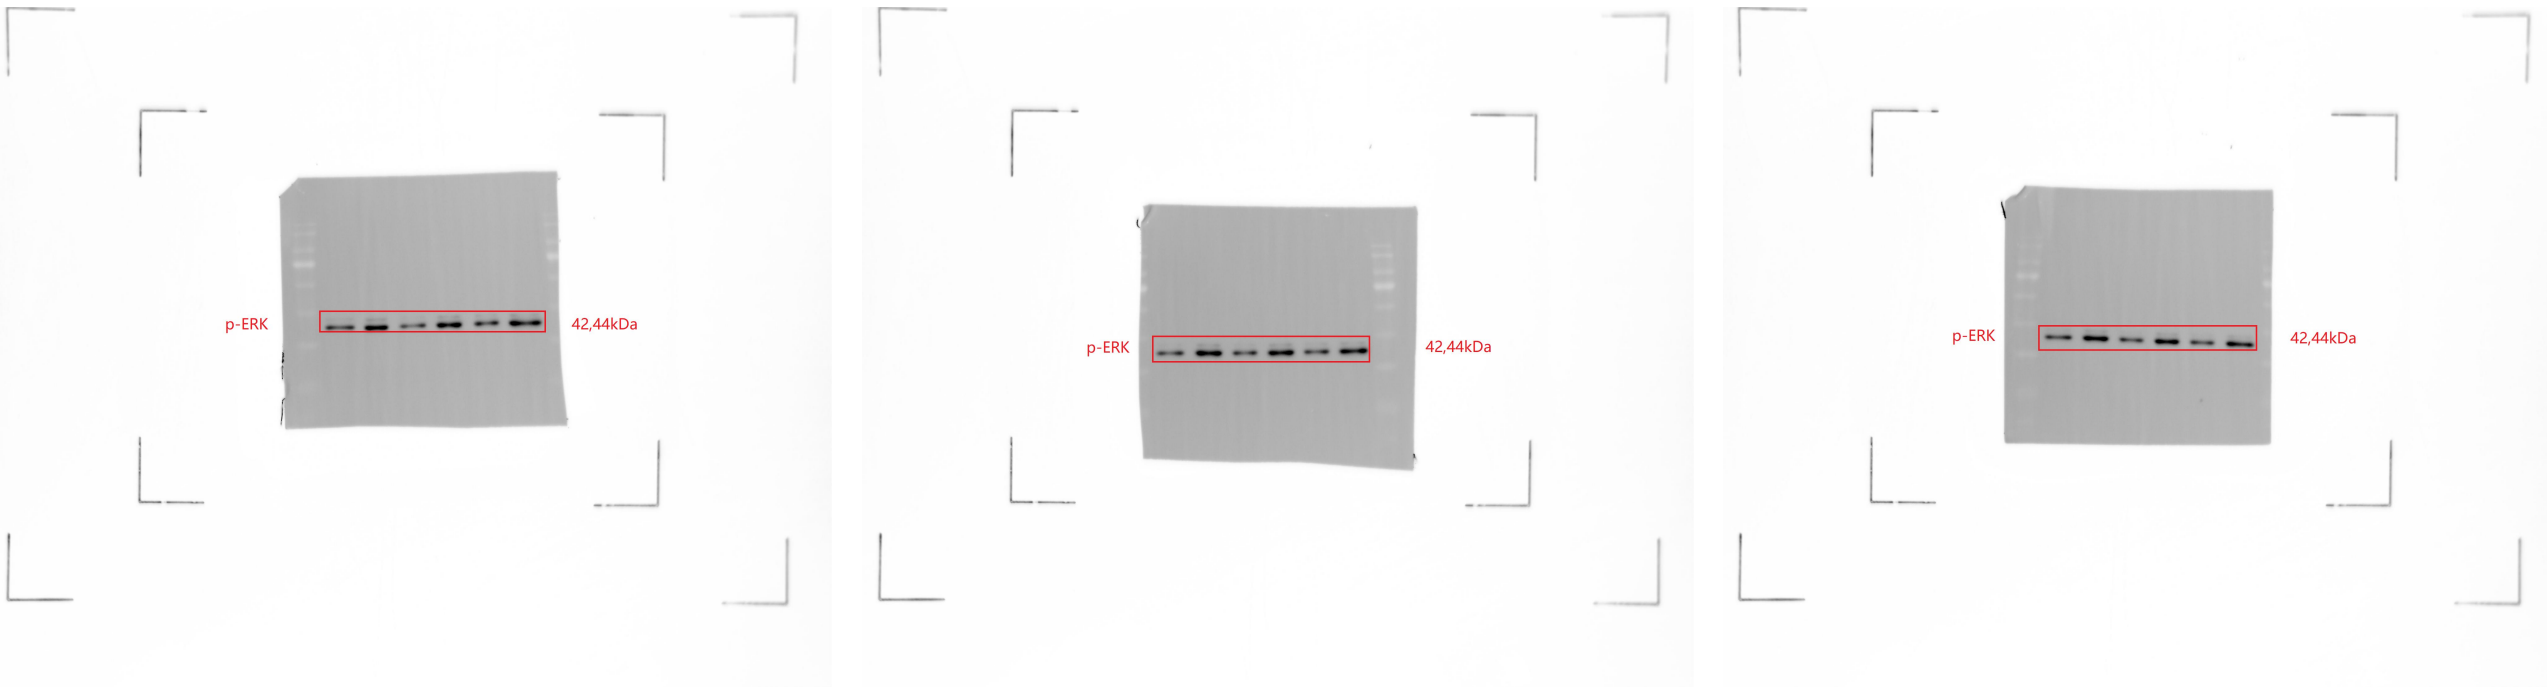

Figure 8A  
The original blot of MAPK in K562 cells

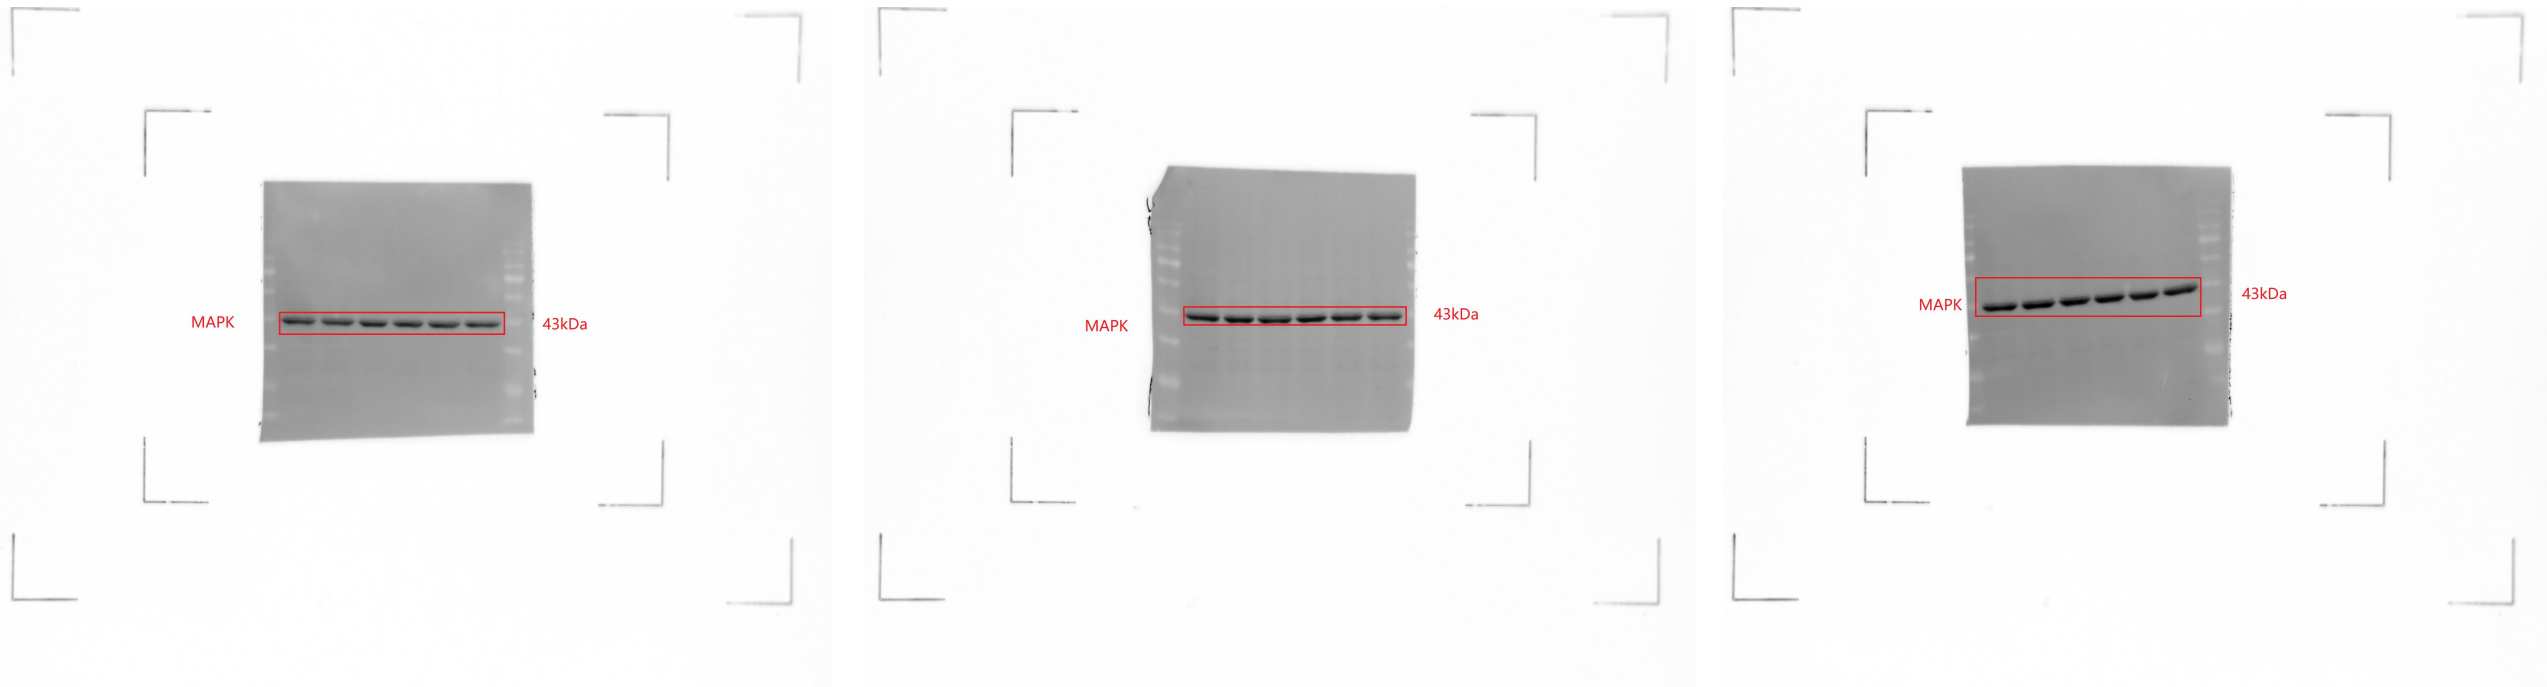

Figure 8A  
The original blot of P-MAPK in K562 cells

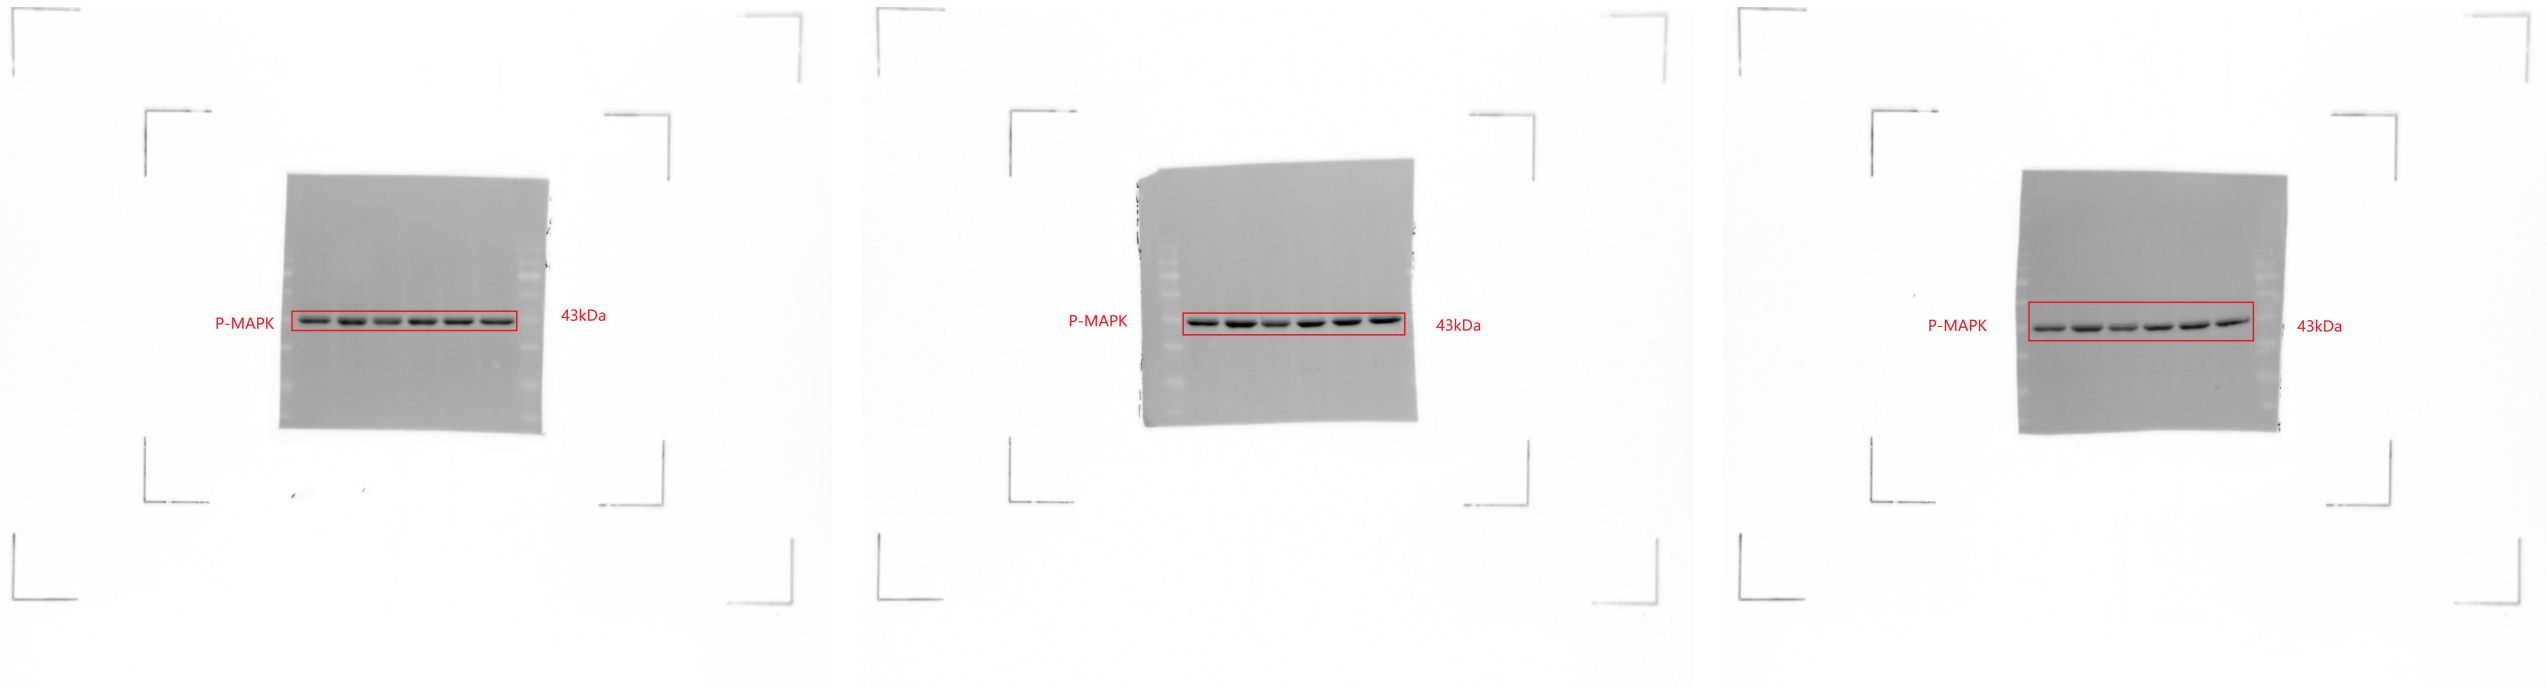

Figure 8B  
The original blot of GAPDH in MEG-01 cells

GAPDH

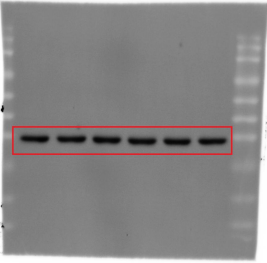

36kDa

GAPDH

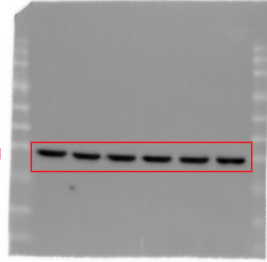

36kDa

GAPDH

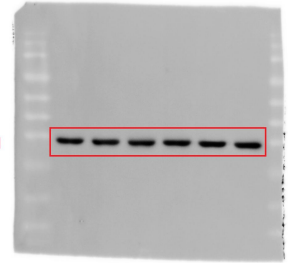

36kDa

Figure 8B  
The original blot of PI3K in MEG-01 cells

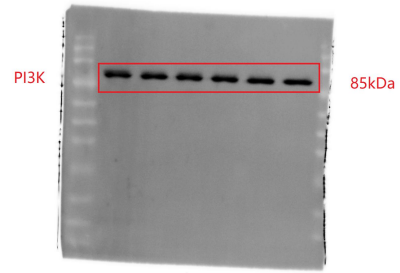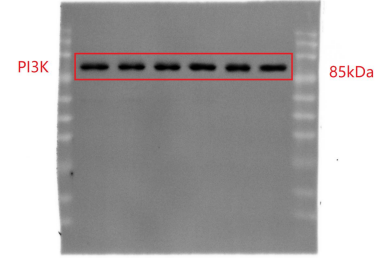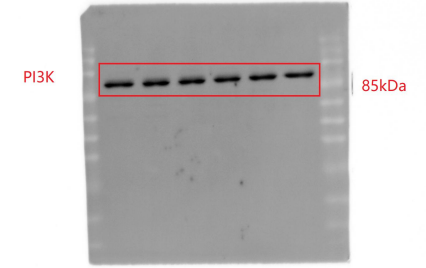

Figure 8B

The original blot of p-PI3K in MEG-01 cells

p-PI3K

80kDa

p-PI3K

80kDa

p-PI3K

80kDa

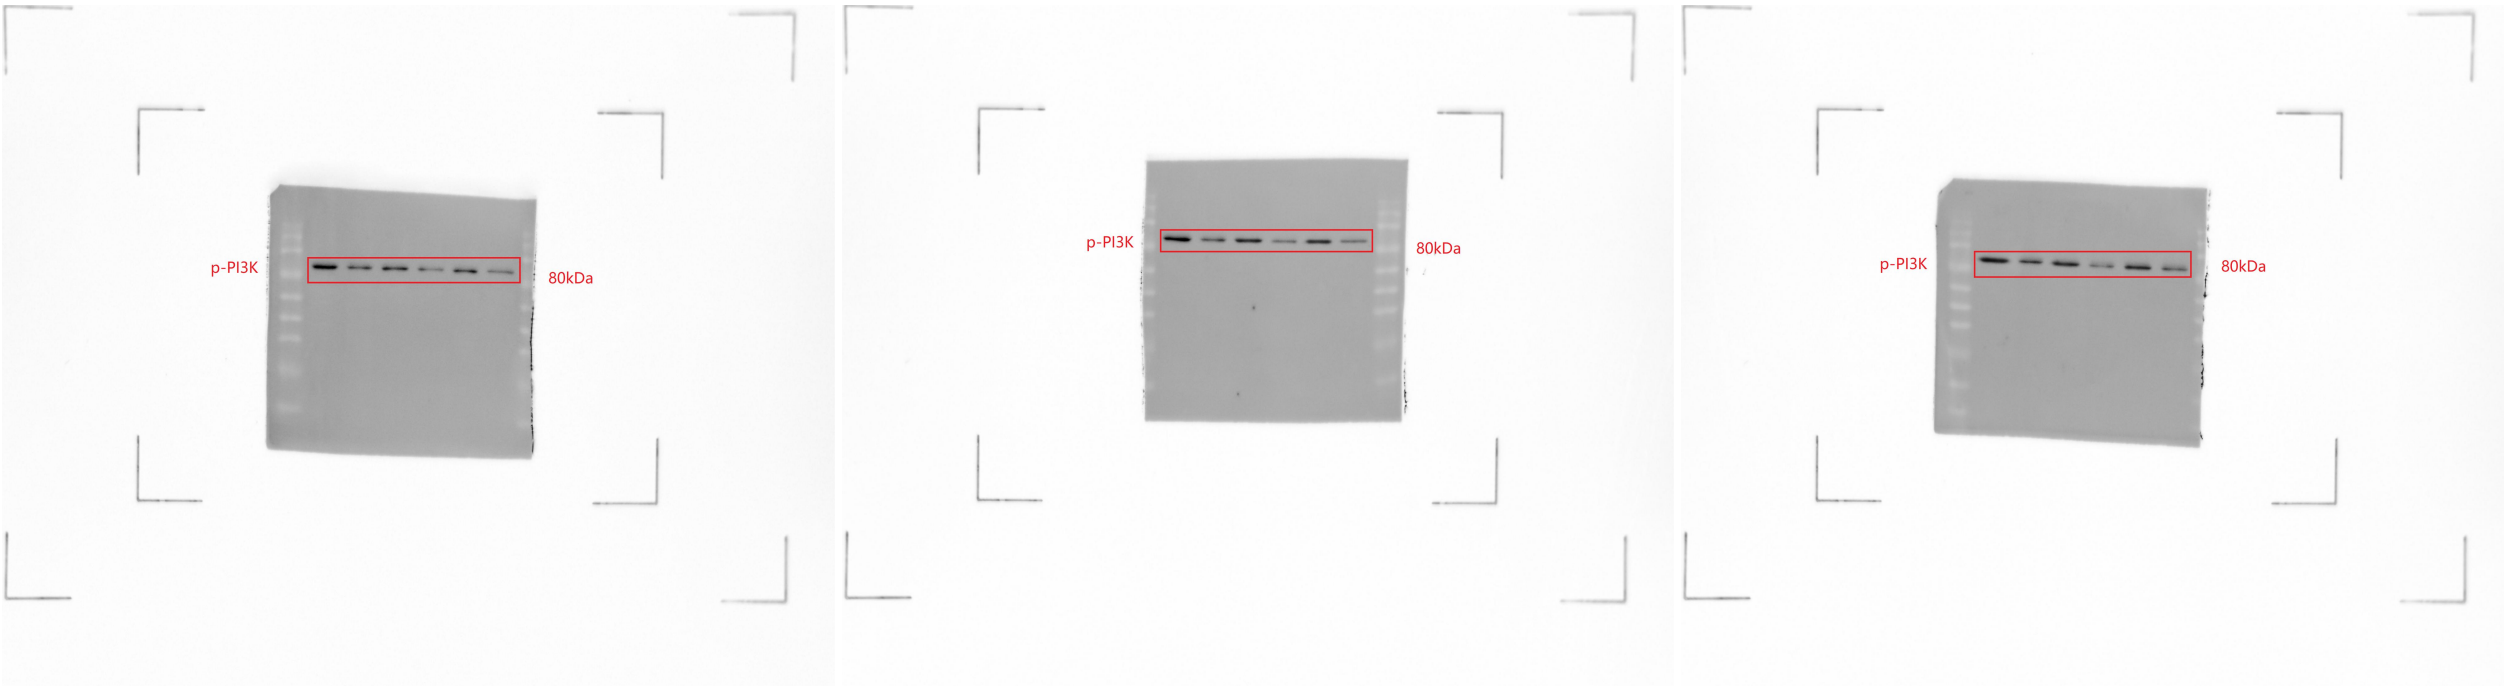

Figure 8B  
The original blot of GAPDH in MEG-01 cells

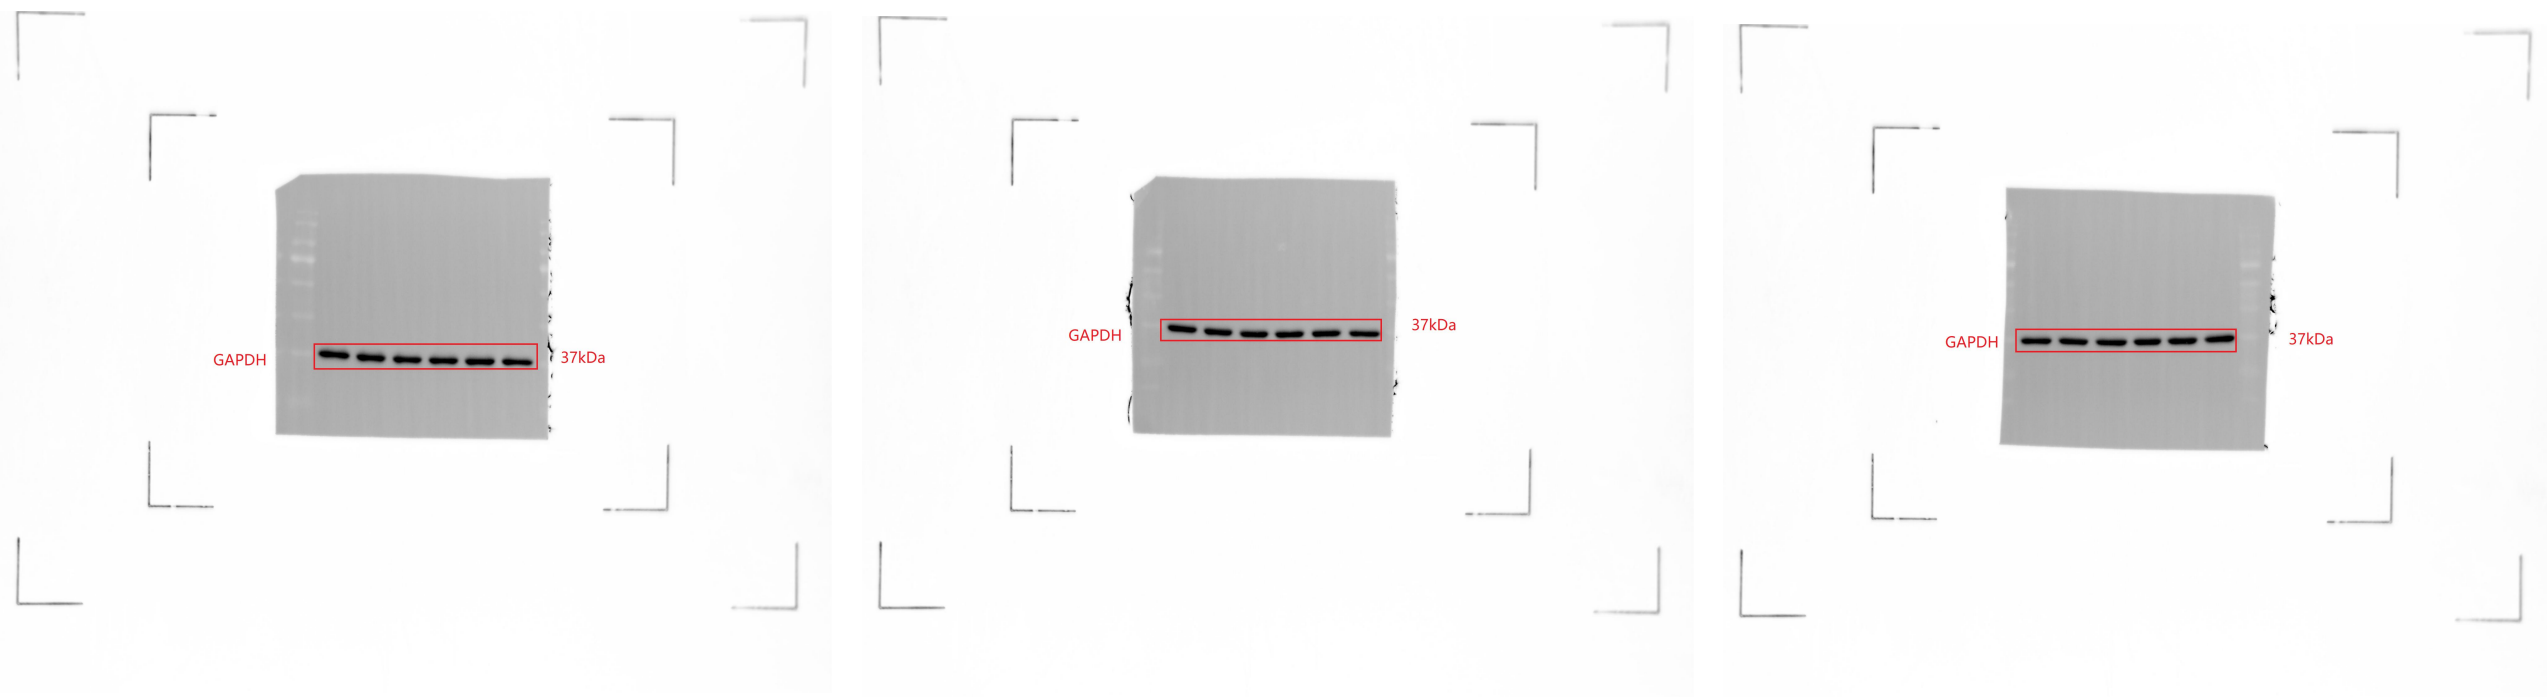



Figure 8B  
The original blot of AKT in MEG-01 cells

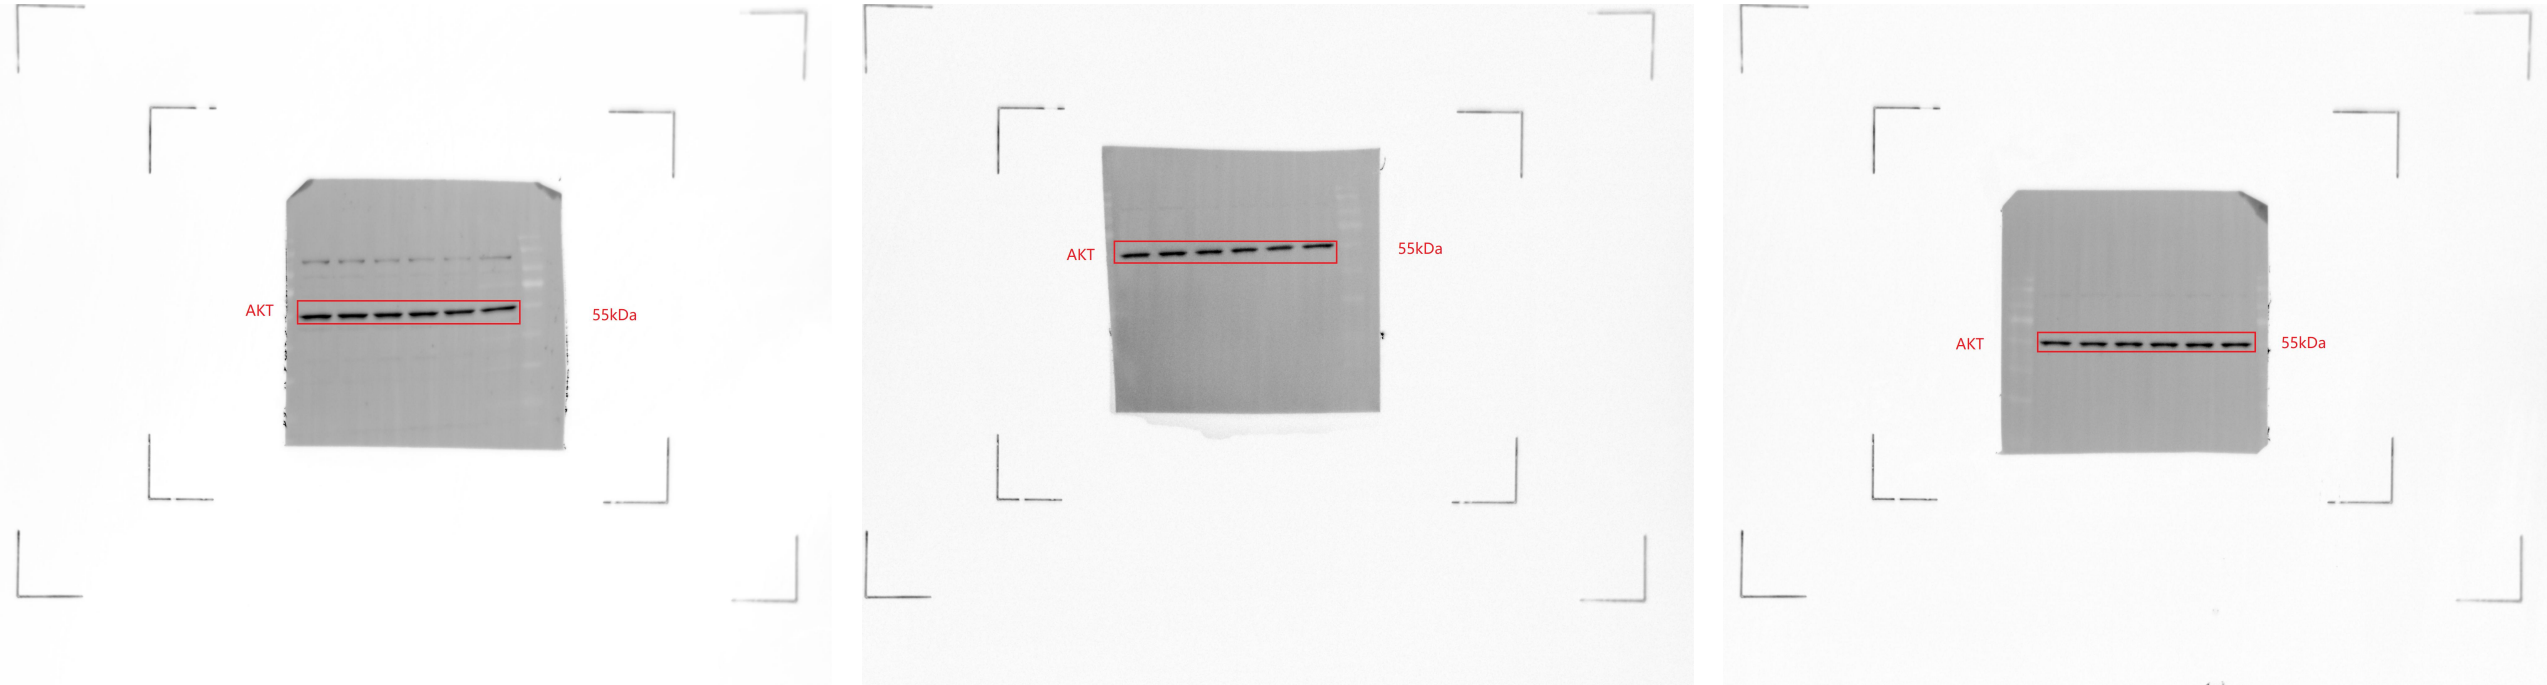

Figure 8B

The original blot of P-AKT in MEG-01 cells

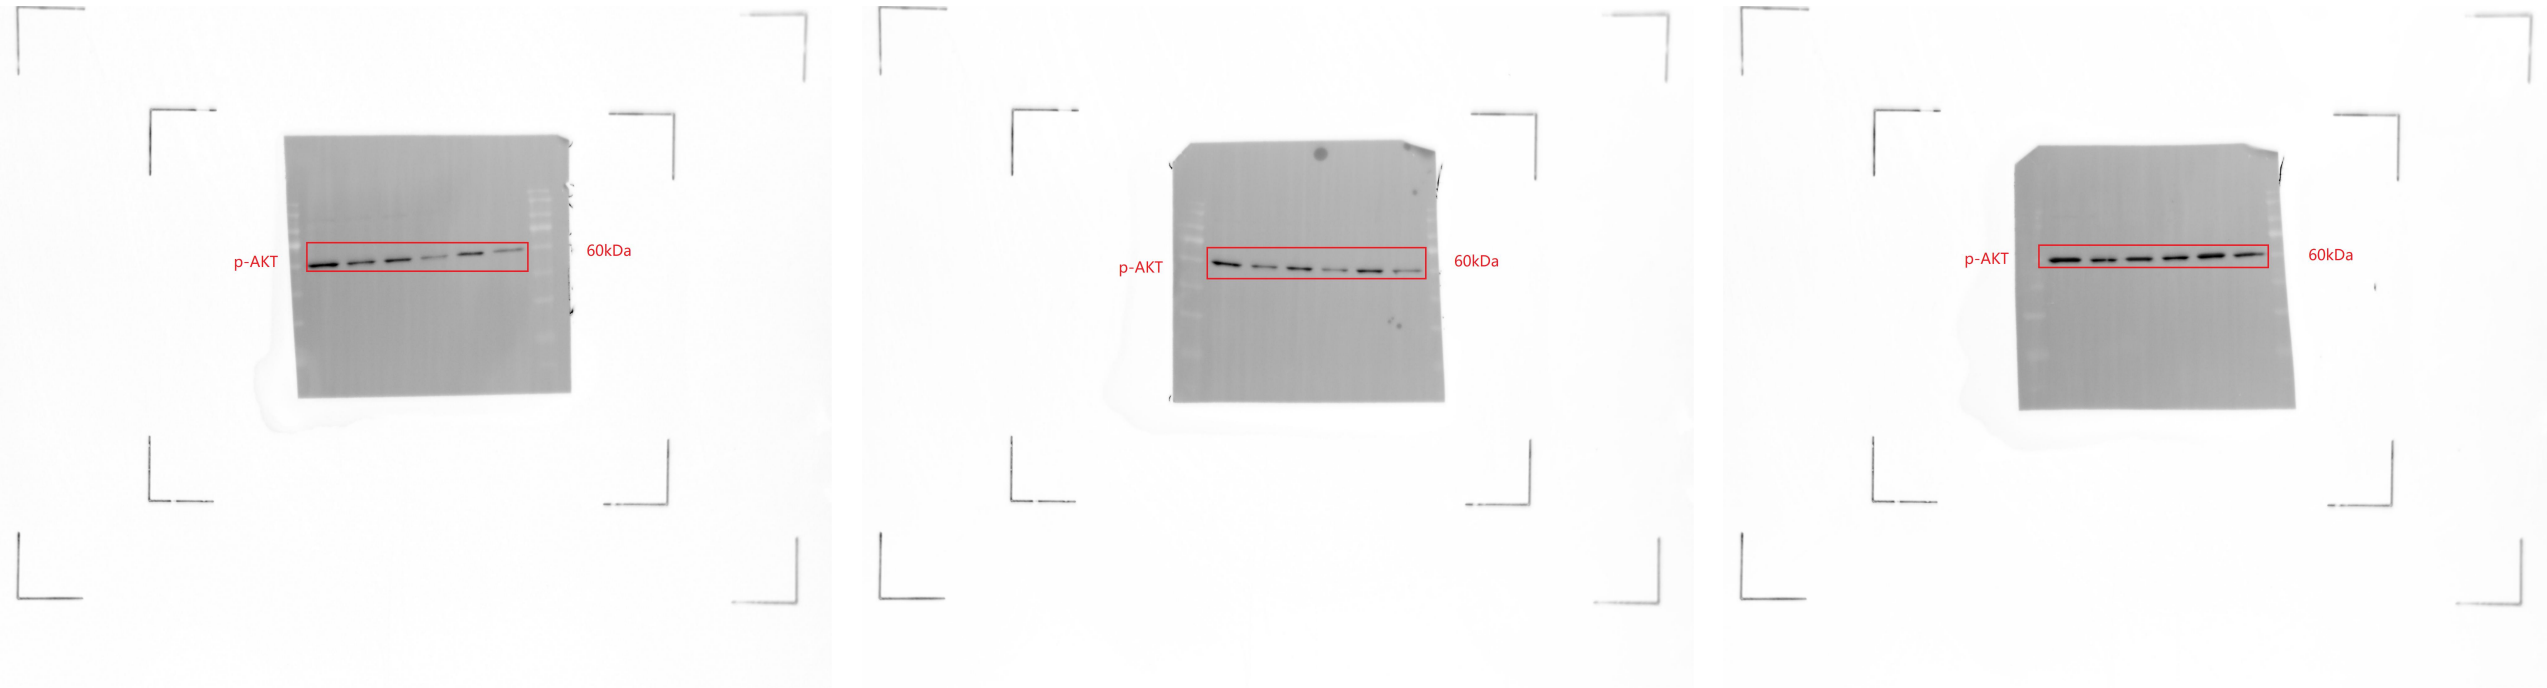

Figure 8B  
The original blot of mTOR in MEG-01 cells

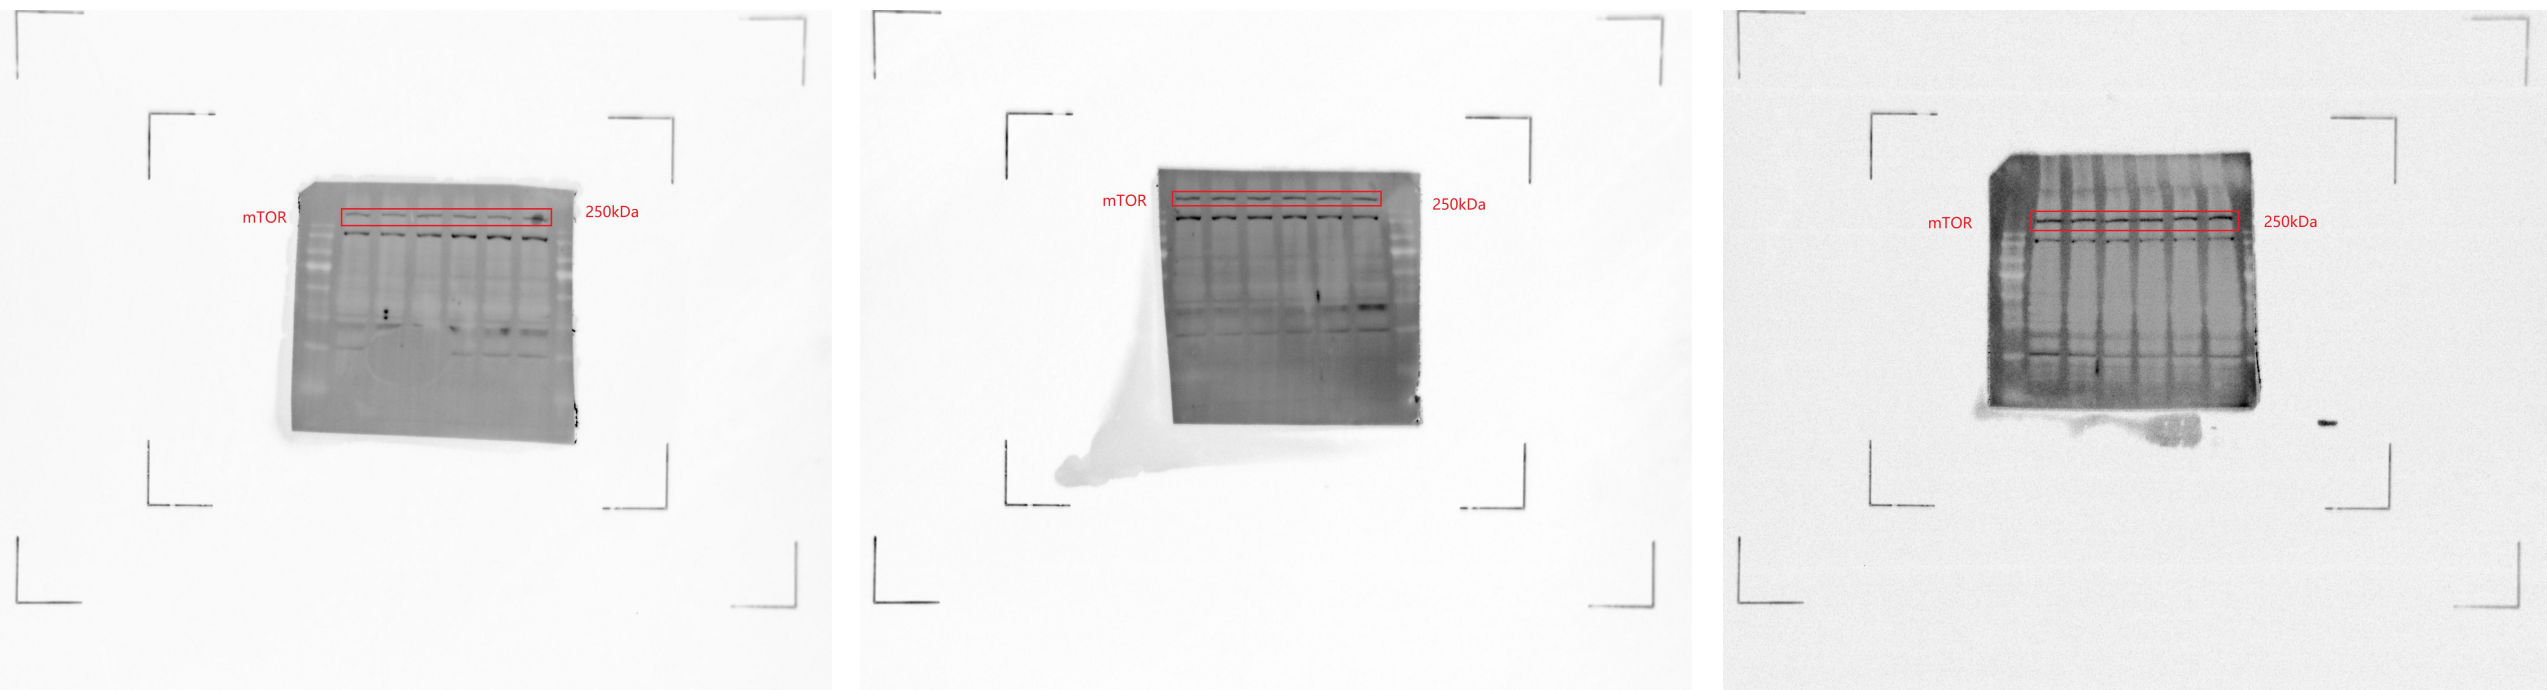

Figure 8B

The original blot of P-mTOR in MEG-01 cells

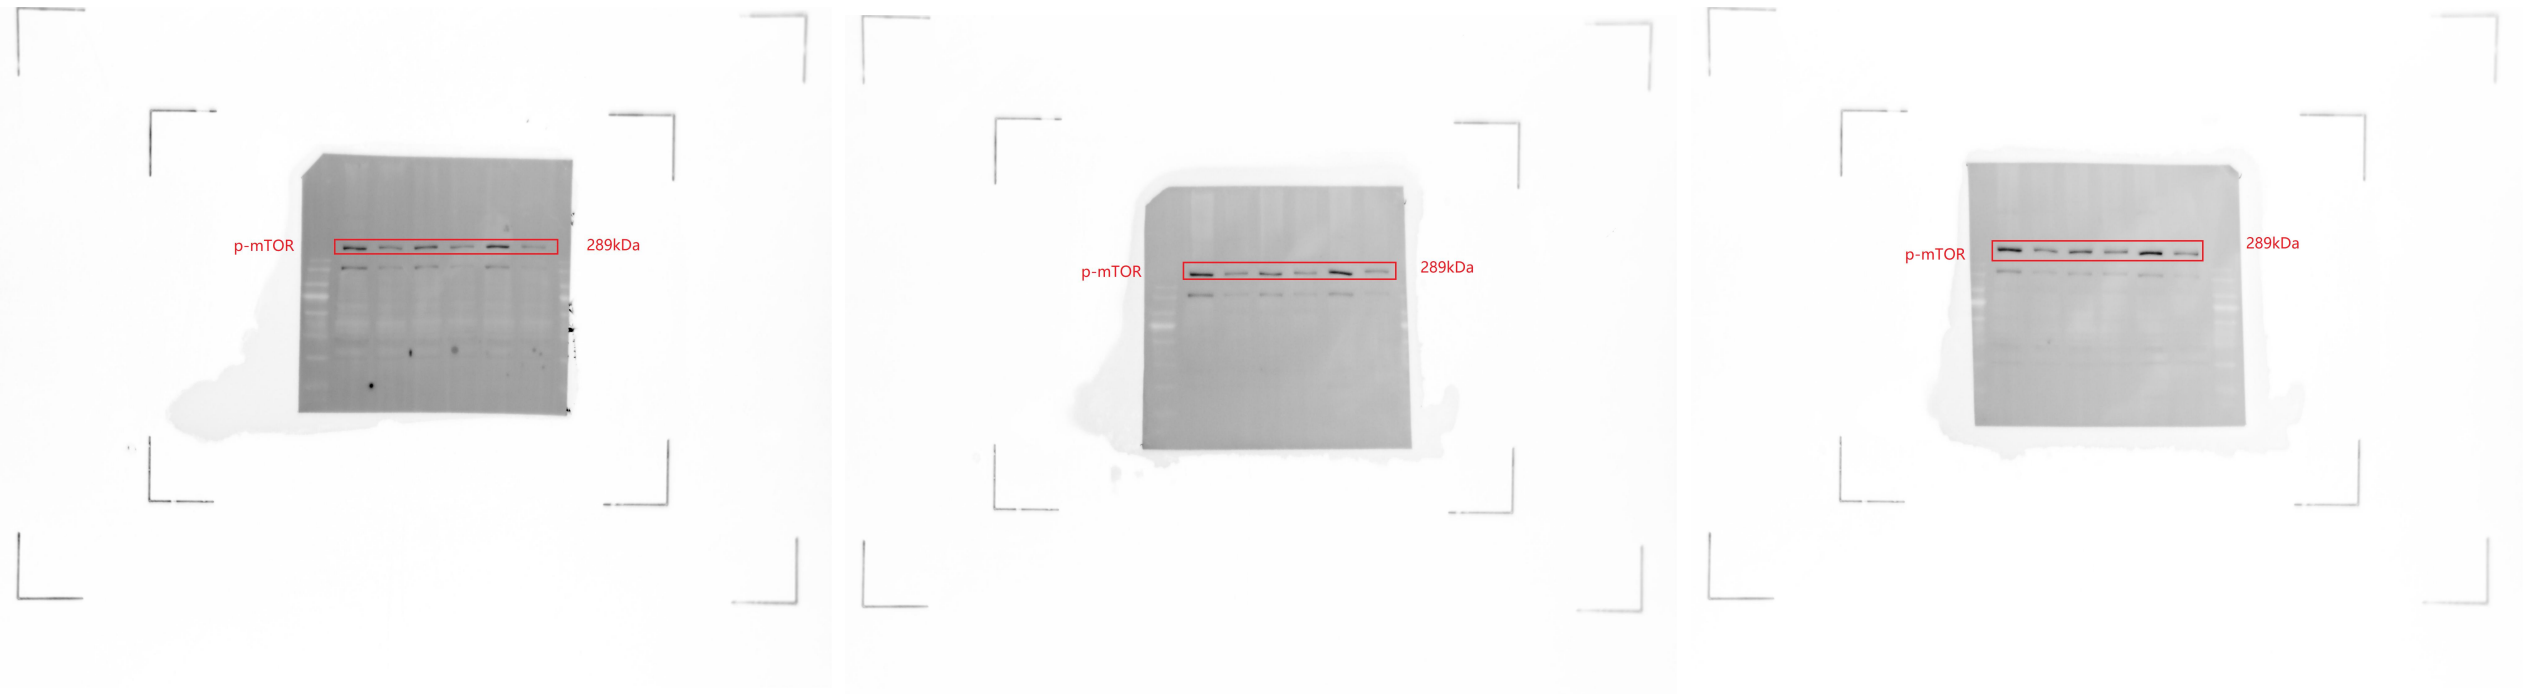

Figure 8B

The original blot of ERK in MEG-01 cells

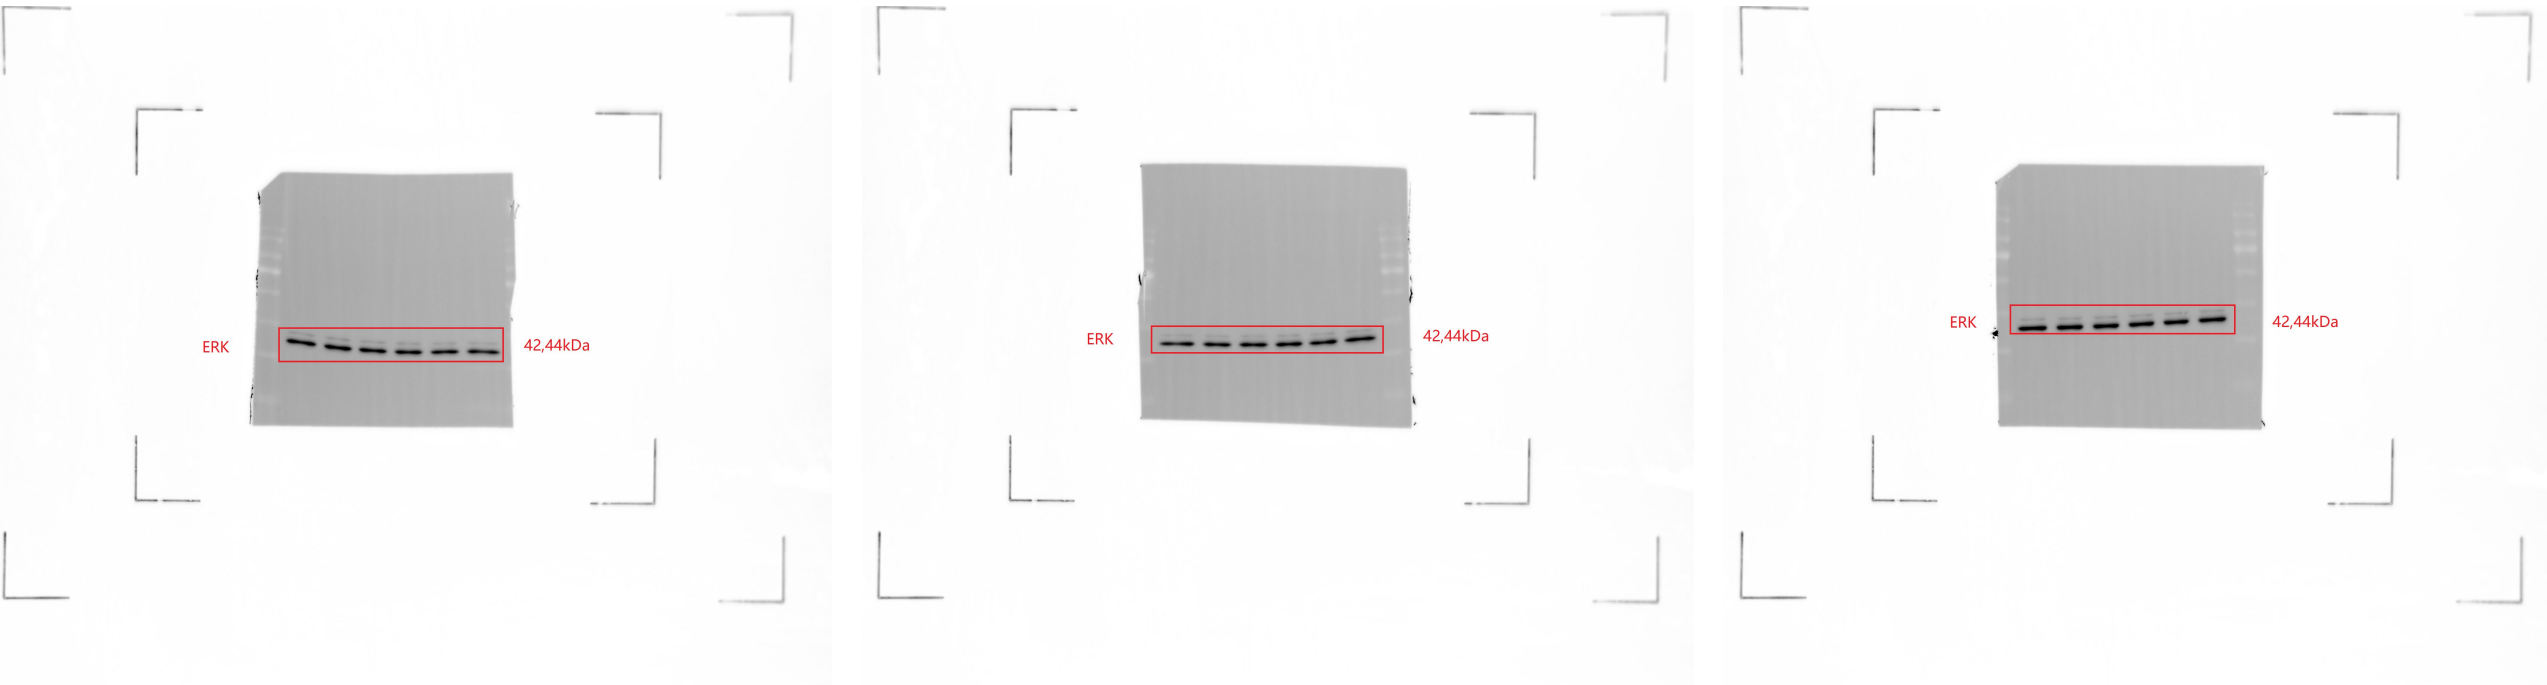

Figure 8B

The original blot of P-ERK in MEG-01 cells

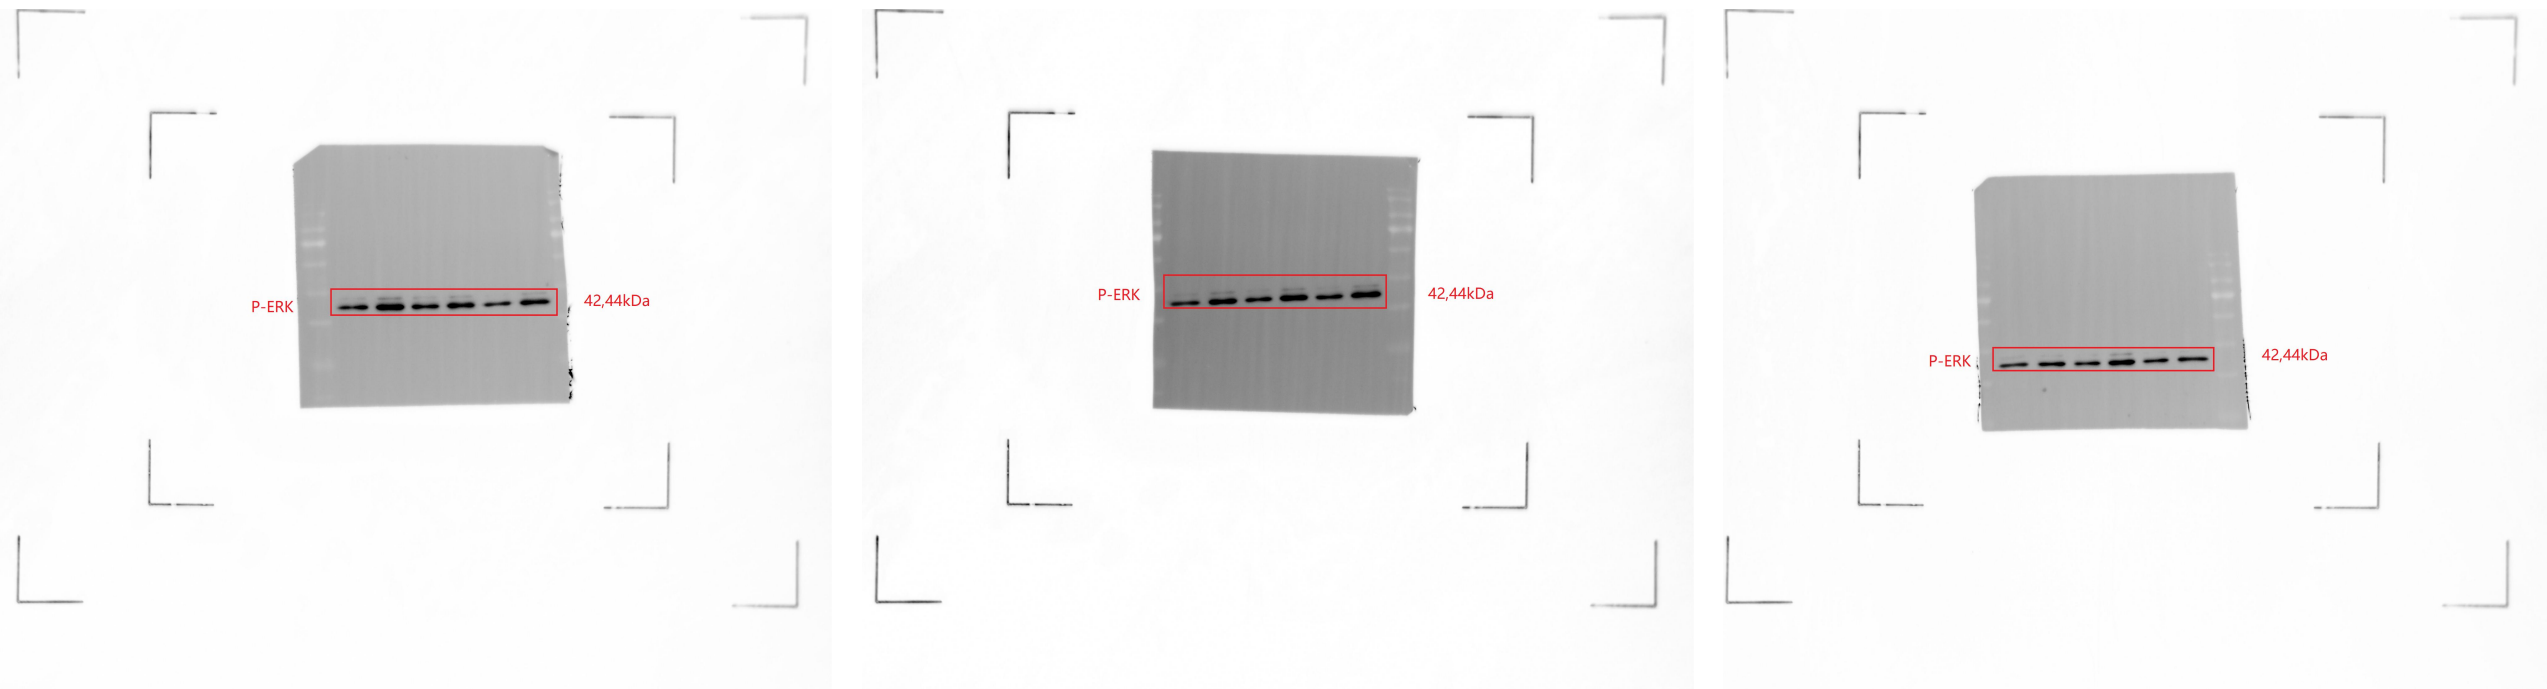

Figure 8B

The original blot of MAPK in MEG-01 cells

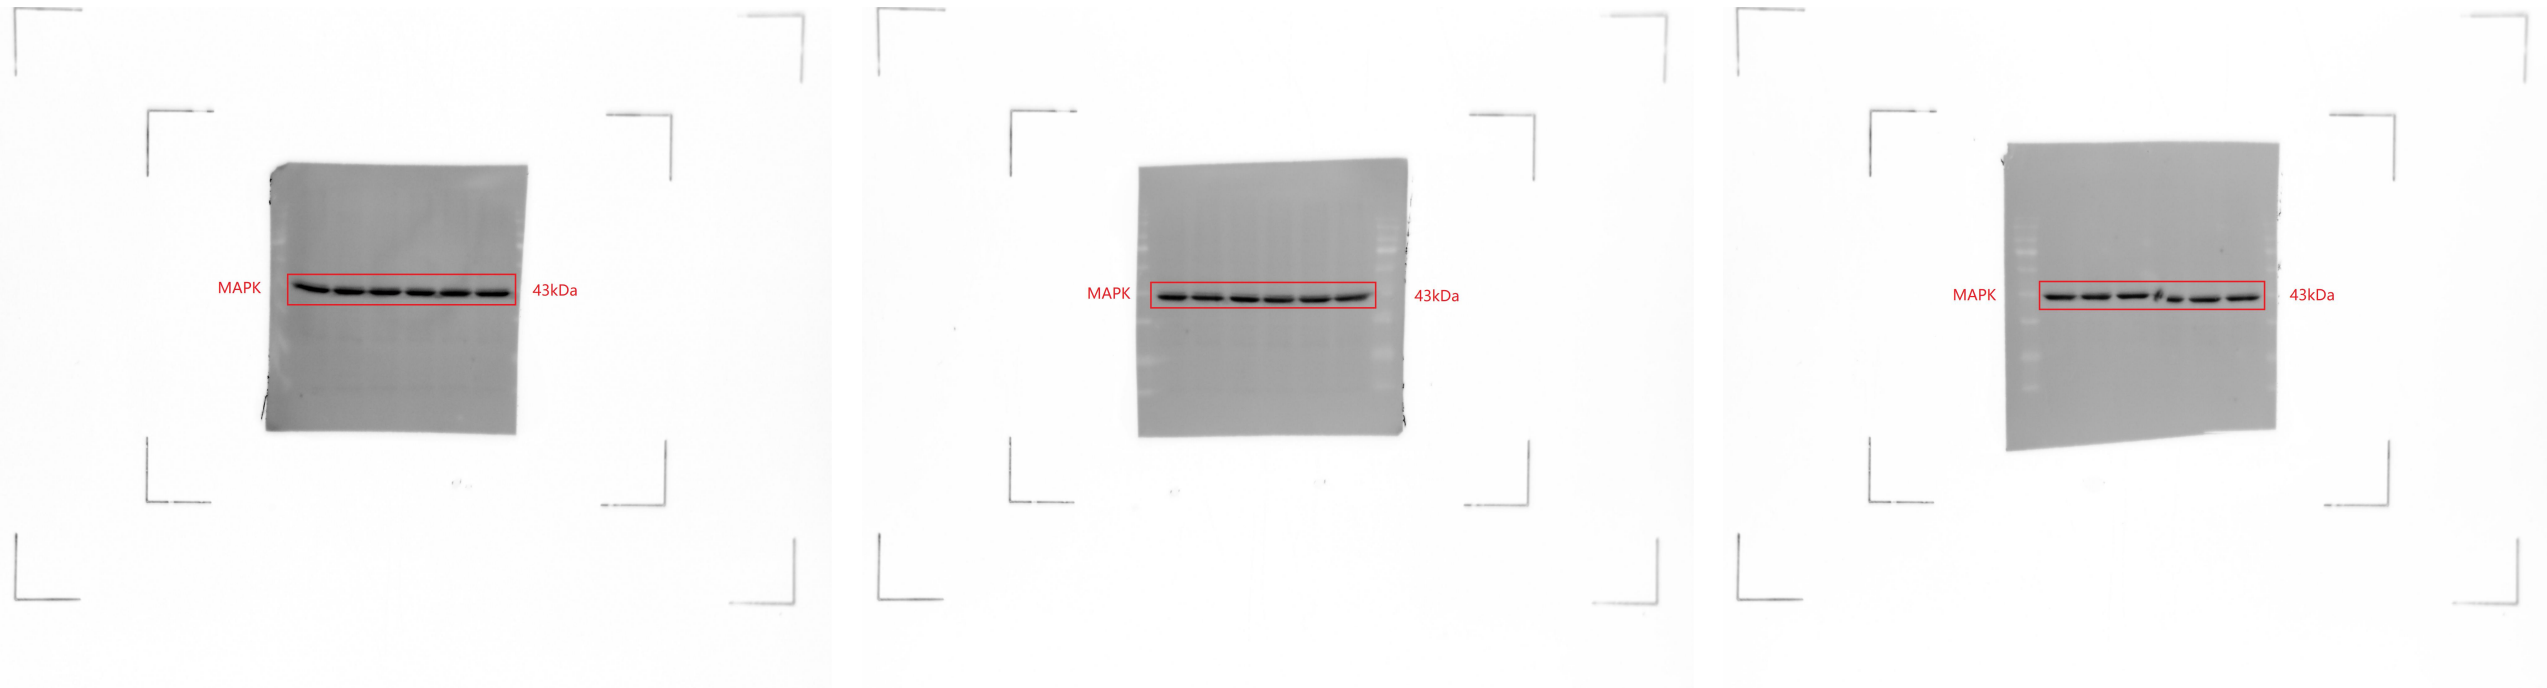

Supplement: The_original_gels_of_western_blot.pdf [file The_original_gels_of_western_blot.pdf]
