# Supplementary material for: BIBR1532 inhibits proliferation and enhances apoptosis in multiple myeloma cells by reducing telomerase activity
Source: PeerJ. 2023 Nov 8;11:e16404. doi: 10.7717/peerj.16404 (PMC10638922; doi:10.7717/peerj.16404)
Supplement: Data S1 [file peerj-11-16404-s001.xlsx]

## Sheet: Figure 1
Figure1
Following treatment with various dosages of BIBR1532 for 24 and 48 h, cell survival was measured by MTT and IC50 value was calculated.
K562 24 h	OD value	0mM	0.75mM	1.5mM	3mM	6.25mM	12.5mM	25mM	50mM	100mM	Blank
	1	1.2126	1.1625	1.0014	1.0166	0.9277	0.8749	0.8216	0.8096	0.7739	0.1876
	2	1.235	1.1465	1.0594	0.9931	0.8851	0.8376	0.8845	0.8475	0.7422	0.159
	3	1.2115	1.0928	1.0255	0.96	0.956	0.9015	0.862	0.8133	0.7094	0.1247
	4	1.3033	1.0999	1.0589	0.9869	0.9962	0.832	0.8667	0.8053	0.7367	0.1515
	5	1.3398	1.1097	1.0364	0.9622	0.9559	0.8339	0.8682	0.8365	0.722	0.1658
	6	1.1721	1.0806	1.0291	1.0981	0.8886	0.8578	0.846	0.8247	0.7078	0.1479
	av	1.24572	1.11533	1.03512	1.00282	0.934917	0.856283	0.858167	0.822817	0.732	0.156083
	sd	0.0631969	0.0321874	0.0220112	0.0511852	0.0431728	0.0276882	0.0217567	0.0165658	0.0248119	0.0208284
	Cell survival (%)	0mM	0.75mM	1.5mM	3mM	6.25mM	12.5mM	25mM	50mM	100mM
	1	96.9608	92.3629	77.5781	78.973	70.8143	65.9687	61.0771	59.9758	56.6995
	2	99.0165	90.8945	82.901	76.8164	66.9048	62.5455	66.8497	63.4541	53.7903
	3	96.8598	85.9662	79.7898	73.7786	73.4115	68.4099	64.7848	60.3154	50.7801
	4	105.285	86.6178	82.8551	76.2474	77.1009	62.0316	65.2161	59.5812	53.2855
	5	108.634	87.5172	80.7902	73.9805	73.4024	62.2059	65.3538	62.4446	51.9364
	6	93.2439	84.8466	80.1202	86.4526	67.226	64.3993	63.3164	61.3616	50.6332
	av	100	88.0342	80.6724	77.7081	71.4766	64.2601	64.433	61.1888	52.8542
	sd	5.79984	2.95396	2.02006	4.69747	3.96214	2.54106	1.9967	1.52031	2.27708
	p		0	1.62725e-05	2.5528e-05	1.66888e-06	7.63375e-08	5.90086e-08	2.04914e-08	4.51066e-09
K562 48 h	OD value	0mM	0.75mM	1.5mM	3mM	6.25mM	12.5mM	25mM	50mM	100mM	Blank
	1	1.1023	0.9147	0.8339	0.783	0.7785	0.6849	0.6492	0.5748	0.5871	0.1196
	2	1.0781	0.9494	0.7849	0.752	0.7764	0.6342	0.6393	0.6146	0.5391	0.0866
	3	1.0894	0.8807	0.7712	0.7061	0.7015	0.6633	0.6001	0.583	0.5236	0.0715
	4	1.0847	0.8822	0.8082	0.7313	0.7191	0.6816	0.5624	0.5756	0.5475	0.0795
	5	1.1025	0.9012	0.7858	0.7192	0.7225	0.6624	0.6198	0.568	0.586	0.0811
	6	1.0684	0.8324	0.7501	0.6855	0.6747	0.6154	0.6509	0.5648	0.5126	0.0703
	av	1.08757	0.893433	0.789017	0.729517	0.728783	0.656967	0.620283	0.580133	0.549317	0.0847667
	sd	0.0134806	0.0391363	0.0291264	0.0345294	0.0413321	0.0272133	0.0343315	0.0180416	0.0312742	0.0181284
	Cell survival (%)	0mM	0.75mM	1.5mM	3mM	6.25mM	12.5mM	25mM	50mM	100mM
	1	101.469	82.7616	74.7042	69.6284	69.1796	59.8458	56.2857	48.8665	50.0931
	2	99.056	86.2219	69.8178	66.537	68.9702	54.7899	55.2985	52.8354	45.3065
	3	100.183	79.3711	68.4517	61.9598	61.5011	57.6918	51.3894	49.6842	43.7608
	4	99.7141	79.5207	72.1413	64.4728	63.2562	59.5167	47.63	48.9463	46.1441
	5	101.489	81.4154	69.9076	63.2662	63.5953	57.602	53.3539	48.1884	49.9834
	6	98.0887	74.5546	66.3476	59.9056	58.8286	52.9152	56.4553	47.8693	42.6639
	av	100	80.6409	70.2284	64.295	64.2218	57.0602	53.4021	49.3984	46.3253
	sd	1.3443	3.9027	2.90451	3.4433	4.12167	2.71373	3.42357	1.79912	3.11869
	p		4.39706e-07	5.9778e-10	4.12669e-10	1.93322e-09	9.27909e-12	2.83322e-11	9.24772e-14	3.15639e-12
MEG-01 24 h	OD value	0mM	0.75μM	1.5μM	3μM	6.25μM	12.5μM	25μM	50μM	100μM	Blank
	1	0.8159	0.8482	0.8196	0.7931	0.765	0.7607	0.6898	0.4736	0.4501	0.1925
	2	0.8256	0.844	0.7878	0.753	0.7426	0.7152	0.6571	0.4294	0.4178	0.1503
	3	0.809	0.7904	0.765	0.7324	0.7269	0.7038	0.6426	0.428	0.4037	0.1187
	4	0.8035	0.8078	0.8024	0.7528	0.7582	0.7176	0.6215	0.4449	0.4072	0.1511
	5	0.8989	0.8385	0.8064	0.7349	0.7307	0.7082	0.6531	0.4358	0.4039	0.134
	6	0.884	0.8186	0.7724	0.7373	0.7125	0.6916	0.6463	0.4206	0.3955	0.1166
	av	0.839483	0.824583	0.792267	0.750583	0.739317	0.716183	0.651733	0.438717	0.413033	0.143867
	sd	0.0411947	0.0228666	0.0210126	0.022678	0.0198723	0.0236902	0.0223908	0.0189391	0.0195378	0.0280467
	Cell survival (%)	0mM	0.75μM	1.5μM	3μM	6.25μM	12.5μM	25μM	50μM	100μM
	1	96.6097	101.253	97.1416	93.3321	89.2925	88.6743	78.4819	47.4016	44.0233
	2	98.0042	100.649	92.5701	87.5674	86.0723	82.1334	73.7811	41.0475	39.3799
	3	95.6178	92.9439	89.2925	84.606	83.8153	80.4945	71.6966	40.8463	37.3529
	4	94.8271	95.4453	94.669	87.5386	88.3149	82.4784	68.6633	43.2758	37.8561
	5	108.542	99.8586	95.244	84.9654	84.3616	81.1271	73.206	41.9676	37.3817
	6	106.4	96.9979	90.3563	85.3104	81.7452	78.7407	72.2285	39.7824	36.1741
	av	100	97.858	93.2123	87.22	85.6003	82.2747	73.0096	42.3869	38.6947
	sd	5.92204	3.28724	3.02072	3.26014	2.85679	3.40564	3.21884	2.72264	2.80871
	p		0.978	0.04	0	0.000317009	8.29215e-05	1.89705e-06	9.86739e-10	5.66354e-10
MEG-01 48 h	OD value	0mM	0.75μM	1.5μM	3μM	6.25μM	12.5μM	25μM	50μM	100μM	Blank
	1	1.2137	1.05	1.0869	1.0145	0.9408	0.8744	0.6461	0.4752	0.4104	0.122
	2	1.1314	1.0781	1.014	0.9713	0.9364	0.7921	0.6309	0.4515	0.395	0.0982
	3	1.1277	1.0836	1.0566	0.9576	0.899	0.822	0.6196	0.4493	0.3931	0.0744
	4	1.1235	1.0796	1.0569	0.9684	0.9291	0.8376	0.6336	0.4551	0.4029	0.1058
	5	1.162	1.0848	1.0554	0.957	0.9085	0.8062	0.6281	0.455	0.3919	0.085
	6	1.1217	1.0186	0.9861	0.8639	0.8904	0.786	0.6239	0.4473	0.3931	0.078
	av	1.14667	1.06578	1.04265	0.95545	0.917367	0.819717	0.630367	0.455567	0.397733	0.0939
	sd	0.0360039	0.0264464	0.036158	0.0495868	0.020939	0.0328557	0.00917773	0.010101	0.00736985	0.0182317
	Cell survival (%)	0mM	0.75μM	1.5μM	3μM	6.25μM	12.5μM	25μM	50μM	100μM
	1	106.367	90.8178	94.3229	87.4458	80.4452	74.138	52.4523	36.2189	30.0636
	2	98.5499	93.487	87.3983	83.3423	80.0272	66.3205	51.0085	33.9676	28.6008
	3	98.1984	94.0094	91.4448	82.041	76.4747	69.1606	49.9351	33.7587	28.4204
	4	97.7994	93.6295	91.4733	83.0668	79.3338	70.6424	51.2649	34.3096	29.3512
	5	101.456	94.1234	91.3308	81.984	77.3771	67.6598	50.7425	34.3001	28.3064
	6	97.6285	87.8352	84.7481	73.1406	75.6578	65.7411	50.3435	33.5687	28.4204
	av	100	92.3171	90.1197	81.8367	78.2193	68.9437	50.9578	34.3539	28.8605
	sd	3.41993	2.51208	3.43457	4.71014	1.98895	3.12089	0.871772	0.959474	0.700046
	p		0.00126438	0.000542699	1.75149e-05	9.67991e-08	1.4526e-08	1.13349e-11	6.65685e-13	2.51518e-13

## Sheet: Figure 2
Figure 2
BIBR1532 reduced cell proliferation of multiple myeloma cells.
Number of total cells					Number of total cells
K562	Control	BIBR1532-25	BIBR1532-50		MEG-1	Control	BIBR1532-25	BIBR1532-50
1	227	221	206		1	230	182	189
2	244	255	227		2	189	204	211
3	270	226	263		3	181	206	193
AV	247	234	232		AV	200	197.333	197.667
SD	21.6564	18.3576	28.8271		SD	26.2869	13.3167	11.7189
Number of proliferating cells					Number of proliferating cells
K562	Control	BIBR1532-25	BIBR1532-50		MEG-1	Control	BIBR1532-25	BIBR1532-50
1	85	67	50		1	55	34	11
2	94	62	51		2	47	37	16
3	90	61	55		3	50	44	13
AV	89.6667	63.3333	52		AV	50.6667	38.3333	13.3333
SD	4.50925	3.21455	2.64575		SD	4.04145	5.1316	2.51661
Rate for positive cells (%)					Rate for positive cells (%)
K562	Control	BIBR1532-25	BIBR1532-50		MEG-1	Control	BIBR1532-25	BIBR1532-50
1	37.4449	30.3167	24.2718		1	23.913	18.6813	5.82011
2	38.5246	24.3137	22.467		2	24.8677	18.1373	7.58294
3	33.3333	26.9912	20.9125		3	27.6243	21.3592	6.73575
AV	36.4343	27.2072	22.5505		AV	25.4684	19.3926	6.71293
SD	2.73922	3.00733	1.6812		SD	1.92716	1.72473	0.881638
P		0.0171203	0.00170619		P		0.015235	0.00010566

## Sheet: Figure 3A
Figure 3A
After K562 and MEG-01 cells were stimulated by 25 or 50 μM BIBR1532 for 48 h, cell apoptosis was assessed by flow cytometric analysis
k562	UL	UR	LR	LL	Apoptosis (%)			K562 cell apoptosis was determined by flow cytometry (%)
1	3.44	1.56	4.18	90.8	5.74				Control	BIBR1532-25	BIBR1532-50
2	2.54	1.68	6.04	89.7	7.72			1	5.74	9.73	15.61
3	2.76	1.61	5.96	89.7	7.57			2	7.72	8.62	16.13
4	3.17	1.82	7.91	87.1	9.73			3	7.57	7.93	16.72
5	2.49	1.74	6.88	88.9	8.62			AV	7.01	8.76	16.1533
6	1.88	1.8	6.13	90.2	7.93			SD	1.10241	0.90813	0.555368
7	1.87	5.75	9.86	82.5	15.61			P		0.101093	0.000212775
8	1.58	6.34	9.79	82.3	16.13
9	1.98	6.62	10.1	81.3	16.72
MEG-01	UL	UR	LR	LL	Apoptosis (%)			MEG-01 cell apoptosis was determined by flow cytometry (%)
1	3.66	1.22	3.53	91.6	4.75				Control	BIBR1532-25	BIBR1532-50
2	3.5	1.31	3.19	92	4.5			1	4.75	15.45	18.11
3	3.35	1.34	3.88	91.4	5.22			2	4.5	10.92	20.15
4	2.02	6.34	9.11	82.5	15.45			3	5.22	16.36	24.54
5	2.45	3.72	7.2	86.6	10.92			AV	4.82333	14.2433	20.9333
6	2.04	6.26	10.1	81.6	16.36			SD	0.365559	2.91383	3.28579
7	4.38	8.52	9.59	77.5	18.11			P		0.00513697	0.0010794
8	3.44	8.05	12.1	76.4	20.15
9	2.6	8.44	16.1	72.9	24.54

## Sheet: Figure 3B
Figure 3B
After K562 and MEG-01 cells were stimulated by 25 or 50 μM BIBR1532 for 48 h, Bcl-xL, Bad and survivin protein expressions were tested by western blot
K562-GAPDH	Protein	Control	BIBR1532-25	BIBR1532-50									MEG-01-GAPDH	Protein	Control	BIBR1532-25	BIBR1532-50
	GAPDH	58020.7	56218.2	55753.5										GAPDH	53664.6	49868.7	50164.7
	GAPDH	60559.5	58649.9	58247.2										GAPDH	56165.8	52380.8	52594
	GAPDH	55476.8	53808.2	53344.8										GAPDH	51196.8	47406.1	47564
	AV	58019	56225.4	55781.8										AV	53675.8	49885.2	50107.6
	SD	2541.38	2420.87	2451.32										SD	2484.51	2487.39	2515.49
K562-Bcl-XL	Protein	Control	BIBR1532-25	BIBR1532-50									MEG-01-Bcl-XL	Protein	Control	BIBR1532-25	BIBR1532-50
	Bcl-XL	55515.1	34635.1	28983.1										Bcl-XL	49704.1	33180.1	29058.8
	Bcl-XL	52937.3	32496.5	27136.4										Bcl-XL	47851.3	31375	27872.6
	Bcl-XL	57705.6	36460.5	30686.7										Bcl-XL	51182.4	34628.6	29866
	GAPDH	58020.7	56218.2	55753.5										GAPDH	53664.6	49868.7	50164.7
	GAPDH	60559.5	58649.9	58247.2										GAPDH	56165.8	52380.8	52594
	GAPDH	55476.8	53808.2	53344.8										GAPDH	51196.8	47406.1	47564
	Bcl-XL/GAPDH	0.956814	0.616084	0.519844										Bcl-XL/GAPDH	0.926199	0.66535	0.579268
	Bcl-XL/GAPDH	0.874136	0.554076	0.465884										Bcl-XL/GAPDH	0.851965	0.598979	0.529957
	Bcl-XL/GAPDH	1.04018	0.677602	0.575251										Bcl-XL/GAPDH	0.999718	0.730468	0.627911
	av	0.957042	0.61592	0.520326										av	0.925961	0.664932	0.579045
	Statistical data	0.999762	0.643737	0.543177										Statistical data	1.00026	0.718551	0.625586
		0.913373	0.578946	0.486796											0.920088	0.646873	0.572332
		1.08687	0.708016	0.601072											1.07965	0.788875	0.678118
	av	1	0.643566	0.543682										av	1	0.7181	0.625345
	sd	0.0867468	0.0645354	0.0571396										sd	0.0797837	0.0710024	0.0528938
	P		0.00465205	0.00160122										P		0.0102479	0.00247152
K562-Bad	Protein	Control	BIBR1532-25	BIBR1532-50									MEG-01-Bad	Protein	Control	BIBR1532-25	BIBR1532-50
	Bad	27092.7	30767.3	37309.2										Bad	32144.5	34645.3	41332.9
	Bad	25168.3	29150	35193.7										Bad	30349	33023.4	39639.3
	Bad	28728.1	32053	39199.2										Bad	33699.7	36074	42521.5
	GAPDH	58020.7	56218.2	55753.5										GAPDH	53664.6	49868.7	50164.7
	GAPDH	60559.5	58649.9	58247.2										GAPDH	56165.8	52380.8	52594
	GAPDH	55476.8	53808.2	53344.8										GAPDH	51196.8	47406.1	47564
	Bad/GAPDH	0.466948	0.547284	0.669183										Bad/GAPDH	0.598989	0.69473	0.823943
	Bad/GAPDH	0.415596	0.497017	0.604214										Bad/GAPDH	0.540346	0.630449	0.753684
	Bad/GAPDH	0.51784	0.595691	0.734827										Bad/GAPDH	0.658238	0.760956	0.893984
	av	0.466794	0.546664	0.669408										av	0.599191	0.695378	0.823871
	Statistical data	1.00033	1.17243	1.43357										Statistical data	0.999662	1.15945	1.37509
		0.890319	1.06474	1.29439											0.901793	1.05217	1.25784
		1.10935	1.27613	1.5742											1.09854	1.26997	1.49199
	av	1	1.1711	1.43405										av	1	1.16053	1.37497
	sd	0.109517	0.105699	0.139905										sd	0.0983762	0.108907	0.117075
	P		0.123369	0.0133552										P		0.131062	0.0131883
K562-Survivin	Protein	Control	BIBR1532-25	BIBR1532-50									MEG-01-Survivin	Protein	Control	BIBR1532-25	BIBR1532-50
	Survivin	36976.1	28958.3	13557.7										Survivin	47736	27170.5	15127
	Survivin	34183	27151.5	12648.9										Survivin	45659.6	25675.3	14188.7
	Survivin	39405	30568.7	14390.6										Survivin	49467	28427	15931
	GAPDH	58020.7	56218.2	55753.5										GAPDH	53664.6	49868.7	50164.7
	GAPDH	60559.5	58649.9	58247.2										GAPDH	56165.8	52380.8	52594
	GAPDH	55476.8	53808.2	53344.8										GAPDH	51196.8	47406.1	47564
	Survivin/GAPDH	0.637291	0.515105	0.243171										Survivin/GAPDH	0.889525	0.54484	0.301546
	Survivin/GAPDH	0.564453	0.462942	0.217159										Survivin/GAPDH	0.812943	0.490166	0.269778
	Survivin/GAPDH	0.710297	0.568104	0.269766										Survivin/GAPDH	0.966212	0.599649	0.334939
	av	0.637347	0.515384	0.243366										av	0.88956	0.544885	0.302088
	Statistical data	0.999912	0.808202	0.381537										Statistical data	0.99996	0.612483	0.338984
		0.885629	0.726358	0.340723											0.913871	0.551021	0.303271
		1.11446	0.891358	0.423264											1.08617	0.674096	0.376522
	av	1	0.808639	0.381842										av	1	0.612534	0.339592
	sd	0.114416	0.0825007	0.0412713										sd	0.0861489	0.0615376	0.0366292
	P		0.0785391	0.000918807										P		0.00317134	0.000257544

## Sheet: Figure 4A
Figure 4A
K562 and MEG-01 cells were cultured with 25 or 50 μM BIBR1532 for 48 h, then, TERT and c-MYC expressions were assessed by qRT-PCR
K562	Control	BIBR1532-25	BIBR1532-50		MEG-1	Control	BIBR1532-25	BIBR1532-50
TERT	24.23	24.43	25.25		TERT	22.54	22.94	24.04
TERT	24.42	24.94	25.21		TERT	22.61	23.02	24
TERT	24.36	24.62	25.47		TERT	22.55	23.02	24.04
GAPDH	21.51	21.5	21.57		GAPDH	16.6	16.61	16.67
GAPDH	21.5	21.66	21.53		GAPDH	16.63	16.78	16.62
GAPDH	21.65	21.51	21.53		GAPDH	16.6	16.65	16.62
av	21.5533	21.5567	21.5433		av	19.02	19.18	19.18
ΔCt	2.72	2.93	3.68		ΔCt	5.94	6.33	7.37
	2.92	3.28	3.68			5.98	6.24	7.38
	2.71	3.11	3.94			5.95	6.37	7.42
av	2.78333	3.10667	3.76667		av	5.95667	6.31333	7.39
ΔΔCt	-0.0633333	0.146667	0.896667		ΔΔCt	-0.0166667	0.373333	1.41333
	0.136667	0.496667	0.896667			0.0233333	0.283333	1.42333
	-0.0733333	0.326667	1.15667			-0.00666667	0.413333	1.46333
2^(-ΔΔCt)	1.04488	0.903335	0.537126		2^(-ΔΔCt)	1.01162	0.771997	0.375443
	0.909618	0.708742	0.537126			0.983957	0.82169	0.37285
	1.05214	0.797377	0.448548			1.00463	0.750886	0.362654
av	1.00221	0.803151	0.5076		av	1.00007	0.781525	0.370316
sd	0.080272	0.0974248	0.0511409		sd	0.0143847	0.0363508	0.00676059
P		0.0523724	0.000843502		P		0.000636644	2.70124e-07

## Sheet: Figure 4B
Figure 4B
K562 and MEG-01 cells were cultured with 25 or 50 μM BIBR1532 for 48 h, then, TERT and c-MYC expressions were assessed by western blot
K562-GAPDH	Protein	Control	BIBR1532-25	BIBR1532-50								MEG-01-GAPDH	Protein	Control	BIBR1532-25	BIBR1532-50
	GAPDH	50947.5	47347.6	45842.1									GAPDH	54960.5	50061.6	48395.3
	GAPDH	53547.8	49786.8	48234.3									GAPDH	57387.4	52609.6	50819.4
	GAPDH	48480	44913.4	43390									GAPDH	52510.5	47567.6	45842.5
	AV	50991.8	47349.3	45822.2									AV	54952.8	50079.6	48352.4
	SD	2534.18	2436.7	2422.22									SD	2438.45	2521.03	2488.72
K562-hTERT	Protein	Control	BIBR1532-25	BIBR1532-50								MEG-01-hTERT	Protein	Control	BIBR1532-25	BIBR1532-50
	hTERT	44735.5	20011.5	11618									hTERT	46119.5	30612	25086.7
	hTERT	42987.4	18713.9	10984.8									hTERT	44026	29006.8	23206.6
	hTERT	46220.9	21133.3	12054.5									hTERT	47875.7	31925.3	26499.4
	GAPDH	50947.5	47347.6	45842.1									GAPDH	54960.5	50061.6	48395.3
	GAPDH	53547.8	49786.8	48234.3									GAPDH	57387.4	52609.6	50819.4
	GAPDH	48480	44913.4	43390									GAPDH	52510.5	47567.6	45842.5
	hTERT/GAPDH	0.87807	0.422652	0.253434									hTERT/GAPDH	0.83914	0.611488	0.518371
	hTERT/GAPDH	0.802785	0.375881	0.227739									hTERT/GAPDH	0.767172	0.551361	0.456648
	hTERT/GAPDH	0.953401	0.470534	0.277816									hTERT/GAPDH	0.911737	0.671157	0.578053
	av	0.878085	0.423022	0.252997									av	0.83935	0.611335	0.517691
	Statistical data	0.999983	0.481333	0.288621									Statistical data	0.99975	0.728525	0.617586
		0.914245	0.428069	0.259359										0.914008	0.65689	0.54405
		1.08577	0.535864	0.316389										1.08624	0.799616	0.688692
	av	1	0.481755	0.288123									av	1	0.728344	0.616776
	sd	0.0857636	0.0538988	0.0285183									sd	0.0861175	0.071363	0.0723247
	P		0.000895582	0.000167184									P		0.0136192	0.00412311
K562-c-MYC	Protein	Control	BIBR1532-25	BIBR1532-50								MEG-01-c-MYC	Protein	Control	BIBR1532-25	BIBR1532-50
	c-MYC	53847.3	40957.3	33149.7									c-MYC	53155.5	38733.7	33308.5
	c-MYC	51289.5	39133.5	31482.3									c-MYC	50943.7	36756.9	31868.3
	c-MYC	56028.6	42463	34495.7									c-MYC	54927.7	40417.5	34341.9
	GAPDH	50947.5	47347.6	45842.1									GAPDH	54960.5	50061.6	48395.3
	GAPDH	53547.8	49786.8	48234.3									GAPDH	57387.4	52609.6	50819.4
	GAPDH	48480	44913.4	43390									GAPDH	52510.5	47567.6	45842.5
	c-MYC/GAPDH	1.05692	0.865036	0.723128									c-MYC/GAPDH	0.967157	0.77372	0.688258
	c-MYC/GAPDH	0.957828	0.78602	0.652695									c-MYC/GAPDH	0.887717	0.698673	0.627089
	c-MYC/GAPDH	1.15571	0.94544	0.795016									c-MYC/GAPDH	1.04603	0.849686	0.749127
	av	1.05682	0.865499	0.723613									av	0.966969	0.774027	0.688158
	Statistical data	1.00009	0.818529	0.684251									Statistical data	1.00019	0.80015	0.711769
		0.906333	0.743762	0.617605										0.91804	0.722539	0.64851
		1.09357	0.894611	0.752274										1.08177	0.87871	0.774717
	av	1	0.818967	0.68471									av	1	0.800467	0.711665
	sd	0.0936201	0.0754256	0.0673357									sd	0.0818626	0.078086	0.0631037
	P		0.0595375	0.00906733									P		0.0378484	0.00845085

## Sheet: Figure 5A
Figure 5A
Phosphorylation of PI3K, AKT and mTOR, ERK1/2 as well as MAPK were quantified by western blot after K562 cells were cultured with BIBR1532 ( 25 or 50 μM) for 48 h.
K562-GAPDH	Protein	Control	BIBR1532-25	BIBR1532-50
	GAPDH	43278.4	41942.4	41260.7
	GAPDH	42523.1	41550.4	42923.4
	GAPDH	42923	43007.7	43674.7
	AV	42908.2	42166.9	42619.6
	SD	377.901	754.123	1235.34
K562-GAPDH	Protein	Control	BIBR1532-25	BIBR1532-50
	PI3K	39479.1	41288.7	40239.4
	PI3K	38419.8	41031.7	39409.9
	PI3K	40231.5	39855.2	40572.7
	GAPDH	43278.4	41942.4	41260.7
	GAPDH	42523.1	41550.4	42923.4
	GAPDH	42923	43007.7	43674.7
	PI3K/GAPDH	0.912213	0.984414	0.975248
	PI3K/GAPDH	0.903504	0.987516	0.918144
	PI3K/GAPDH	0.937294	0.926698	0.928975
	av	0.91767	0.96621	0.940789
	Statistical data	0.994053	1.07273	1.06274
		0.984563	1.07611	1.00052
		1.02138	1.00984	1.01232
	av	1	1.05289	1.02519
	sd	0.0191174	0.0373258	0.0330507
K562-GAPDH	Protein	Control	BIBR1532-25	BIBR1532-50
	PI3K	36838	28342.7	14187
	PI3K	34884.4	22370	8601.95
	PI3K	32543.7	23839.6	11348.1
	PI3K	39479.1	41288.7	40239.4
	PI3K	38419.8	41031.7	39409.9
	PI3K	40231.5	39855.2	40572.7
	p-PI3K/PI3K	0.9331	0.686452	0.352563
	p-PI3K/PI3K	0.90798	0.545187	0.218269
	p-PI3K/PI3K	0.808912	0.598154	0.279697
	av	0.88333	0.609931	0.28351
	Statistical data	1.05634	0.777118	0.39913
		1.02791	0.617194	0.247098
		0.915752	0.677158	0.316639
	av	1	0.69049	0.320956
	sd	0.0743332	0.080791	0.0761079
K562-GAPDH	Protein	Control	BIBR1532-25	BIBR1532-50
	GAPDH	52220.5	48256.6	47194.7
	GAPDH	54787.8	50822.9	49670.4
	GAPDH	49838.7	45655.9	44731.7
	AV	52282.3	48245.1	47198.9
	SD	2475.11	2583.52	2469.35
K562-AKT	Protein	Control	BIBR1532-25	BIBR1532-50
	AKT	51231.5	46508.6	43536.2
	AKT	49426.4	44567.8	41228.8
	AKT	52840.6	47932.6	45375.8
	GAPDH	52220.5	48256.6	47194.7
	GAPDH	54787.8	50822.9	49670.4
	GAPDH	49838.7	45655.9	44731.7
	AKT/GAPDH	0.98106	0.963776	0.92248
	AKT/GAPDH	0.902144	0.876925	0.830049
	AKT/GAPDH	1.06023	1.04987	1.0144
	av	0.981146	0.963523	0.92231
	Statistical data	0.999913	0.982297	0.940207
		0.91948	0.893776	0.846
		1.08061	1.07004	1.03389
	av	1	0.982038	0.940033
	sd	0.0805636	0.088133	0.0939471
	P		0.807307	0.44856
K562-p-AKT	Protein	Control	BIBR1532-25	BIBR1532-50
	p-AKT	50094.4	28304.6	22584.8
	p-AKT	52668.2	29841	23538.7
	p-AKT	47055.4	26319.1	21261.9
	AKT	51231.5	46508.6	43536.2
	AKT	49426.4	44567.8	41228.8
	AKT	52840.6	47932.6	45375.8
	p-AKT/AKT	0.977805	0.608588	0.518759
	p-AKT/AKT	1.06559	0.669565	0.570927
	p-AKT/AKT	0.890516	0.549087	0.468573
	av	0.977969	0.60908	0.51942
	Statistical data	0.999832	0.622298	0.530446
		1.08959	0.684648	0.583788
		0.910577	0.561456	0.479129
	av	1	0.622801	0.531121
	sd	0.0895075	0.0615976	0.052333
	P		0.00385212	0.0014346
K562-mTOR	Protein	Control	BIBR1532-25	BIBR1532-50
	mTOR	35951.3	30383	29867.6
	mTOR	34405.4	28801.1	28303.3
	mTOR	37219.9	31733.3	31191.6
	GAPDH	52220.5	48256.6	47194.7
	GAPDH	54787.8	50822.9	49670.4
	GAPDH	49838.7	45655.9	44731.7
	mTOR/GAPDH	0.688451	0.629613	0.63286
	mTOR/GAPDH	0.627976	0.566695	0.569822
	mTOR/GAPDH	0.746808	0.695054	0.697303
	av	0.687745	0.630454	0.633328
	Statistical data	1.00103	0.915474	0.920196
		0.913095	0.82399	0.828537
		1.08588	1.01063	1.0139
	av	1	0.916698	0.920877
	sd	0.0863966	0.0933248	0.0926824
	P		0.319955	0.34028
K562-p-mTOR	Protein	Control	BIBR1532-25	BIBR1532-50
	P-mTOR	53034.5	38854.9	23192
	P-mTOR	55235.1	40020.2	24167.3
	P-mTOR	50034	37106.3	21768.9
	mTOR	35951.3	30383	29867.6
	mTOR	34405.4	28801.1	28303.3
	mTOR	37219.9	31733.3	31191.6
	P-mTOR/mTOR	1.47518	1.27884	0.776492
	P-mTOR/mTOR	1.60542	1.38954	0.853869
	P-mTOR/mTOR	1.34428	1.16932	0.697911
	av	1.47496	1.27923	0.776091
	Statistical data	1.00015	0.867032	0.52645
		1.08845	0.942086	0.578911
		0.911401	0.79278	0.473173
	av	1	0.867299	0.526178
	sd	0.0885246	0.0746534	0.0528692
	P		0.118146	0.00134984
K562-ERK	Protein	Control	BIBR1532-25	BIBR1532-50
	ERK1/2	43865.2	45770.2	44504.1
	ERK1/2	42341.1	43778.9	43033.3
	ERK1/2	45270.4	47153.9	45635.8
	GAPDH	52220.5	48256.6	47194.7
	GAPDH	54787.8	50822.9	49670.4
	GAPDH	49838.7	45655.9	44731.7
	ERK1/2/GAPDH	0.839999	0.948475	0.942989
	ERK1/2/GAPDH	0.77282	0.861401	0.866377
	ERK1/2/GAPDH	0.908339	1.03281	1.02021
	av	0.840386	0.947563	0.943192
	Statistical data	0.999539	1.12862	1.12209
		0.919601	1.02501	1.03093
		1.08086	1.22897	1.21398
	av	1	1.12753	1.12233
	sd	0.08063	0.101988	0.091526
	P		0.164538	0.157369
K562-P-ERK	Protein	Control	BIBR1532-25	BIBR1532-50
	P-ERK1/2	25393.2	44327.9	42762.8
	P-ERK1/2	26906.2	46040.6	45139.2
	P-ERK1/2	23631.8	41659.2	39820.3
	ERK1/2	43865.2	45770.2	44504.1
	ERK1/2	42341.1	43778.9	43033.3
	ERK1/2	45270.4	47153.9	45635.8
	p-ERK1/2/ERK1/2	0.578893	0.968488	0.960875
	p-ERK1/2/ERK1/2	0.635463	1.05166	1.04894
	p-ERK1/2/ERK1/2	0.522013	0.883471	0.872568
	av	0.57879	0.967874	0.960793
	Statistical data	1.00018	1.6733	1.66015
		1.09792	1.817	1.8123
		0.901905	1.52641	1.50757
	av	1	1.67224	1.66
	sd	0.0980057	0.145299	0.152361
	P		0.00266476	0.00322509
K562-MAPK	Protein	Control	BIBR1532-25	BIBR1532-50
	MAPK p38	51829.8	51662.7	49348.3
	MAPK p38	49898.3	49519.1	47384.3
	MAPK p38	53662.4	53391.6	50859.2
	GAPDH	52220.5	48256.6	47194.7
	GAPDH	54787.8	50822.9	49670.4
	GAPDH	49838.7	45655.9	44731.7
	mTOR/GAPDH	0.992517	1.07058	1.04563
	mTOR/GAPDH	0.910756	0.974347	0.953974
	mTOR/GAPDH	1.07672	1.16944	1.13698
	av	0.993332	1.07145	1.04553
	Statistical data	0.99918	1.07777	1.05265
		0.91687	0.980887	0.960378
		1.08395	1.17729	1.14461
	av	1	1.07865	1.05255
	sd	0.0835432	0.0982023	0.0921184
	P		0.350306	0.504816
K562-P-MAPK	Protein	Control	BIBR1532-25	BIBR1532-50
	P-MAPK p38	45379.2	53186.6	54170.7
	P-MAPK p38	47825.9	55327.6	56983.8
	P-MAPK p38	42669.5	50140.7	50485
	MAPK p38	51829.8	51662.7	49348.3
	MAPK p38	49898.3	49519.1	47384.3
	MAPK p38	53662.4	53391.6	50859.2
	p-MAPK p38/MAPK p38	0.875544	1.0295	1.09772
	p-MAPK p38/MAPK p38	0.958468	1.1173	1.20259
	p-MAPK p38/MAPK p38	0.795146	0.939113	0.992644
	av	0.876386	1.02864	1.09765
	Statistical data	0.999039	1.17471	1.25256
		1.09366	1.27489	1.37221
		0.907301	1.07157	1.13266
	av	1	1.17372	1.25248
	sd	0.0931834	0.101663	0.119779
	P		0.094544	0.0449413

## Sheet: Figure 5B
Figure 5B
Phosphorylation of PI3K, AKT and mTOR, ERK1/2 as well as MAPK were quantified by western blot after MEG-01 cells were cultured with BIBR1532 ( 25 or 50 μM) for 48 h.
K562-GAPDH	Protein	Control	BIBR1532-25	BIBR1532-50
	GAPDH	37952.2	37350.7	37461.2
	GAPDH	38906	38120.3	38817.1
	GAPDH	38749.9	38123.2	37571.3
	AV	38536	37864.7	37949.9
	SD	511.603	445.154	753.097
K562-GAPDH	Protein	Control	BIBR1532-25	BIBR1532-50
	PI3K	34292.3	33508.9	34648.4
	PI3K	35230	34600.1	35319.6
	PI3K	34770.2	34131.7	34007.7
	GAPDH	37952.2	37350.7	37461.2
	GAPDH	38906	38120.3	38817.1
	GAPDH	38749.9	38123.2	37571.3
	PI3K/GAPDH	0.903566	0.89714	0.924914
	PI3K/GAPDH	0.905516	0.907656	0.909897
	PI3K/GAPDH	0.897298	0.895301	0.905153
	av	0.902126	0.900033	0.913321
	Statistical data	1.00699	0.999825	1.03078
		1.00916	1.01154	1.01404
		1	0.997775	1.00875
	av	1.00538	1.00305	1.01786
	sd	0.0047855	0.00742911	0.0114965
K562-GAPDH	Protein	Control	BIBR1532-25	BIBR1532-50
	PI3K	33199.5	21050.7	12487.7
	PI3K	32376	16537.1	9680.25
	PI3K	33593.1	20579.8	13335.8
	PI3K	34292.3	33508.9	34648.4
	PI3K	35230	34600.1	35319.6
	PI3K	34770.2	34131.7	34007.7
	p-PI3K/PI3K	0.968133	0.628214	0.360413
	p-PI3K/PI3K	0.91899	0.47795	0.274076
	p-PI3K/PI3K	0.966148	0.602953	0.39214
	av	0.95109	0.569706	0.34221
	Statistical data	1.01792	0.66052	0.378948
		0.966249	0.502529	0.28817
		1.01583	0.63396	0.412306
	av	1	0.599003	0.359808
	sd	0.029248	0.0845979	0.0642429
MEG-01-GAPDH	Protein	Control	BIBR1532-25	BIBR1532-50
	GAPDH	55822.5	52884.2	50867.8
	GAPDH	58327.8	55316.7	53330.6
	GAPDH	53365.7	50350.4	48239.2
	AV	55838.7	52850.4	50812.5
	SD	2481.13	2483.32	2546.14
MEG-01-AKT	Protein	Control	BIBR1532-25	BIBR1532-50
	AKT	48115.4	47177.1	45472.1
	AKT	45855.2	45304.2	43695.5
	AKT	50131.7	48652.1	46802.8
	GAPDH	55822.5	52884.2	50867.8
	GAPDH	58327.8	55316.7	53330.6
	GAPDH	53365.7	50350.4	48239.2
	AKT/GAPDH	0.861936	0.892083	0.893928
	AKT/GAPDH	0.786163	0.818997	0.819333
	AKT/GAPDH	0.9394	0.966271	0.970222
	av	0.8625	0.89245	0.894494
	Statistical data	0.999346	1.0343	1.03644
		0.911494	0.949562	0.949951
		1.08916	1.12031	1.1249
	av	1	1.03473	1.0371
	sd	0.0888351	0.0853772	0.0874742
	P		0.65099	0.633481
MEG-01-p-AKT	Protein	Control	BIBR1532-25	BIBR1532-50
	p-AKT	55593.1	34555.3	22287
	p-AKT	57318.7	35958.4	23520.2
	p-AKT	53129.3	32562	20653.6
	AKT	48115.4	47177.1	45472.1
	AKT	45855.2	45304.2	43695.5
	AKT	50131.7	48652.1	46802.8
	p-AKT/AKT	1.15541	0.732458	0.490125
	p-AKT/AKT	1.24999	0.793709	0.538274
	p-AKT/AKT	1.05979	0.669283	0.44129
	av	1.15507	0.731817	0.489896
	Statistical data	1.0003	0.634127	0.424326
		1.08218	0.687155	0.466011
		0.917519	0.579433	0.382047
	av	1	0.633571	0.424128
	sd	0.082333	0.0538633	0.0419825
	P		0.00297261	0.000418015
MEG-01-mTOR	Protein	Control	BIBR1532-25	BIBR1532-50
	mTOR	33019.5	36015.6	34153.8
	mTOR	31306	34038	32194.8
	mTOR	34500.3	37520.6	35582
	GAPDH	55822.5	52884.2	50867.8
	GAPDH	58327.8	55316.7	53330.6
	GAPDH	53365.7	50350.4	48239.2
	mTOR/GAPDH	0.591509	0.681028	0.671424
	mTOR/GAPDH	0.536725	0.61533	0.603684
	mTOR/GAPDH	0.646489	0.74519	0.737616
	av	0.591574	0.680516	0.670908
	Statistical data	0.999889	1.15121	1.13498
		0.907283	1.04016	1.02047
		1.09283	1.25967	1.24687
	av	1	1.15035	1.13411
	sd	0.0927729	0.109761	0.113202
	P		0.144215	0.187698
MEG-01-p-mTOR	Protein	Control	BIBR1532-25	BIBR1532-50
	P-mTOR	41740.8	25789.1	21600.1
	P-mTOR	43343	26741	22337.5
	P-mTOR	39493.1	24287.6	20247.8
	mTOR	33019.5	36015.6	34153.8
	mTOR	31306	34038	32194.8
	mTOR	34500.3	37520.6	35582
	P-mTOR/mTOR	1.26412	0.716053	0.632434
	P-mTOR/mTOR	1.3845	0.785622	0.693824
	P-mTOR/mTOR	1.14472	0.647313	0.569046
	av	1.26445	0.716329	0.631768
	Statistical data	0.999747	0.566298	0.500167
		1.09494	0.621318	0.548718
		0.905311	0.511935	0.450036
	av	1	0.566517	0.49964
	sd	0.0948164	0.054692	0.049343
	P		0.00236521	0.00125799
MEG-01-ERK	Protein	Control	BIBR1532-25	BIBR1532-50
	ERK1/2	48536.9	45990.8	45618.2
	ERK1/2	46414.7	44001.9	43880.2
	ERK1/2	50323.8	47537.7	46900.5
	GAPDH	55822.5	52884.2	50867.8
	GAPDH	58327.8	55316.7	53330.6
	GAPDH	53365.7	50350.4	48239.2
	ERK1/2/GAPDH	0.869485	0.869652	0.8968
	ERK1/2/GAPDH	0.795756	0.795454	0.822796
	ERK1/2/GAPDH	0.942999	0.944137	0.972248
	av	0.869413	0.869748	0.897282
	Statistical data	1.00008	1.00027	1.0315
		0.915279	0.914932	0.946381
		1.08464	1.08595	1.11828
	av	1	1.00038	1.03205
	sd	0.0846795	0.0855074	0.0859511
	P		0.995852	0.669319
MEG-01-P-ERK	Protein	Control	BIBR1532-25	BIBR1532-50
	P-ERK1/2	28771.5	34275.3	42516.2
	P-ERK1/2	30284.3	35825	44577.9
	P-ERK1/2	26875.8	32152.1	39754.8
	ERK1/2	48536.9	45990.8	45618.2
	ERK1/2	46414.7	44001.9	43880.2
	ERK1/2	50323.8	47537.7	46900.5
	p-ERK1/2/ERK1/2	0.592775	0.745264	0.932
	p-ERK1/2/ERK1/2	0.652472	0.81417	1.0159
	p-ERK1/2/ERK1/2	0.534058	0.676351	0.847642
	av	0.593102	0.745261	0.931847
	Statistical data	0.99945	1.25655	1.5714
		1.1001	1.37273	1.71286
		0.90045	1.14036	1.42917
	av	1	1.25655	1.57114
	sd	0.0998267	0.116185	0.141845
	P		0.04408	0.0046719
MEG-01-MAPK	Protein	Control	BIBR1532-25	BIBR1532-50
	MAPK p38	55319.5	53803.3	50414.9
	MAPK p38	53036.2	51534.6	48099.8
	MAPK p38	57315.4	55508.3	52102.2
	GAPDH	55822.5	52884.2	50867.8
	GAPDH	58327.8	55316.7	53330.6
	GAPDH	53365.7	50350.4	48239.2
	mTOR/GAPDH	0.990989	1.01738	0.991096
	mTOR/GAPDH	0.909278	0.931628	0.901917
	mTOR/GAPDH	1.07401	1.10244	1.08008
	av	0.991426	1.01715	0.991031
	Statistical data	0.999559	1.02618	0.999667
		0.917141	0.939685	0.909716
		1.0833	1.11197	1.08942
	av	1	1.02595	0.999601
	sd	0.0830801	0.0861445	0.0898524
	P		0.726357	0.995768
MEG-01-P-MAPK	Protein	Control	BIBR1532-25	BIBR1532-50
	P-MAPK p38	39170.7	44511.9	55722.9
	P-MAPK p38	41226.9	47126.3	57579.5
	P-MAPK p38	36665.4	41097.5	52749
	MAPK p38	55319.5	53803.3	50414.9
	MAPK p38	53036.2	51534.6	48099.8
	MAPK p38	57315.4	55508.3	52102.2
	p-MAPK p38/MAPK p38	0.708081	0.827308	1.10529
	p-MAPK p38/MAPK p38	0.777335	0.914459	1.19708
	p-MAPK p38/MAPK p38	0.639714	0.740385	1.01241
	av	0.708377	0.827384	1.10493
	Statistical data	0.999583	1.16789	1.56031
		1.09735	1.29092	1.6899
		0.90307	1.04518	1.4292
	av	1	1.168	1.5598
	sd	0.0971393	0.122869	0.130349
	P		0.136751	0.00396788

## Sheet: Figure 6A
Figure 6A
Following K562 and MEG-01 cells were stimulated by BIBR1532 alone or in combination with Dox or Bor for 48 h, cell viability was tested via MTT
K562 24 h	OD Value	Control	BIBR1532	Dox	BIBR1532+Dox	Bor	BIBR1532+Bor	Blank		K562 48 h	OD Value	Control	BIBR1532	Dox	BIBR1532+Dox	Bor	BIBR1532+Bor	Blank
	1	1.0913	0.7286	0.6649	0.5374	0.6513	0.5849	0.1788			1	1.0379	0.5673	0.5507	0.4343	0.6047	0.4664	0.1919
	2	1.1115	0.7628	0.6438	0.5038	0.7035	0.5466	0.1631			2	1.0183	0.6031	0.5488	0.4254	0.5768	0.4208	0.1651
	3	1.0904	0.732	0.614	0.5614	0.673	0.6104	0.1322			3	1.1275	0.6747	0.4814	0.3901	0.5355	0.447	0.1529
	4	1.233	0.7248	0.6382	0.4988	0.703	0.6466	0.1564			4	1.0236	0.668	0.4972	0.3562	0.5582	0.4634	0.1594
	5	1.2058	0.8929	0.616	0.5005	0.6828	0.6103	0.1692			5	1.0381	0.5612	0.5003	0.4078	0.5473	0.4462	0.1785
	6	1.0549	0.7422	0.7383	0.522	0.6762	0.5497	0.1531			6	1.0104	0.5583	0.4572	0.4358	0.517	0.4039	0.1519
	av	1.13115	0.763883	0.652533	0.52065	0.681633	0.591417	0.1588			av	1.04263	0.605433	0.505933	0.408267	0.556583	0.441283	0.166617
	sd	0.0712668	0.0646616	0.0460653	0.0249412	0.0198001	0.0388675	0.0159528			sd	0.0429853	0.0535727	0.0372194	0.0308887	0.0310614	0.0244701	0.0157453
K562 24 h	Cell viability（%）	Control	BIBR1532	Dox	BIBR1532+Dox	Bor	BIBR1532+Bor			K562 48 h	Cell viability（%）	Control	BIBR1532	Dox	BIBR1532+Dox	Bor	BIBR1532+Bor
	1	95.9017	58.6003	52.0492	38.9366	50.6505	43.8217				1	99.4597	45.7392	43.8443	30.5569	50.0086	34.2212
	2	97.9791	62.1176	49.8792	35.4811	56.0189	39.8828				2	97.2223	49.8259	43.6274	29.5409	46.8237	29.0158
	3	95.8091	58.95	46.8144	41.4048	52.8822	46.4442				3	109.688	57.9993	35.9335	25.5113	42.1092	32.0066
	4	110.475	58.2095	49.3032	34.9668	55.9675	50.1671				4	97.8273	57.2345	37.7371	21.6415	44.7004	33.8787
	5	107.677	75.4975	47.0201	35.1417	53.8901	46.4339				5	99.4825	45.0429	38.091	27.5318	43.4562	31.9153
	6	92.1582	59.999	59.5979	37.3528	53.2113	40.2016				6	96.3205	44.7119	33.171	30.7281	39.9973	27.0866
	av	100	62.229	50.7773	37.214	53.7701	44.4919				av	100	50.0923	38.734	27.5851	44.5159	31.354
	sd	7.32934	6.65003	4.73753	2.56504	2.03631	3.99728				sd	4.9069	6.11549	4.24871	3.52604	3.54576	2.79334
	p		2.93645e-06	7.6868e-08	2.36122e-09	3.76134e-08	1.58191e-08				p		2.40971e-08	5.17816e-10	4.91128e-11	6.91705e-10	4.26084e-11
					0.000105945		0.000487603								0.000581816		3.13312e-05

## Sheet: Figure 6B
Figure 6B
Following K562 and MEG-01 cells were stimulated by BIBR1532 alone or in combination with Dox or Bor for 48 h, cell apoptosis were tested via flow cytometric analysis.
								K562 cell apoptosis was determined by flow cytometry (%)
	UL	UR	LR	LL	Apoptosis (%)				Control	BIBR1532	Dox	BIBR1532+Dox	Bor	BIBR1532+Bor
1	3.37	1.75	5.42	89.5	7.17			1	7.17	15.9	24.4	34.1	20.57	24.76
2	2.81	0.75	5.1	91.5	5.85			2	5.85	14.21	23.5	32.4	22.06	27.47
3	3.17	1.88	5.67	89.3	7.55			3	7.55	16.62	19.41	28.32	19.62	25.73
4	2.03	6.1	9.8	82.1	15.9			AV	6.85667	15.5767	22.4367	31.6067	20.75	25.9867
5	2.9	5.72	8.49	82.9	14.21			SD	0.892263	1.23711	2.65952	2.97054	1.22992	1.37311
6	2.44	6.42	10.2	81	16.62			P		0.000583857	0.000652889	0.000158846	9.28991e-05	3.52198e-05
7	3.38	13.8	10.6	72.3	24.4							0.0163526		0.00792745
8	2.52	13	10.5	73.9	23.5
9	3.3	9.84	9.57	77.3	19.41
10	1.87	11.1	23	64	34.1
11	2.61	13.6	18.8	85.1	32.4
12	2.17	7.32	21	69.5	28.32
13	2.53	6.97	13.6	76.9	20.57
14	2.6	7.66	14.4	75.3	22.06
15	1.29	5.62	14	79.1	19.62
16	1.38	6.46	18.3	74.9	24.76
17	1.48	7.97	19.5	71.7	27.47
18	1.61	6.93	18.8	73.9	25.73
								MEG-01 cell apoptosis was determined by flow cytometry (%)
	UL	UR	LR	LL	Apoptosis (%)				Control	BIBR1532	Dox	BIBR1532+Dox	Bor	BIBR1532+Bor
1	4.72	1.64	2.4	91.2	4.04			1	4.04	19.96	26.5	36.9	34.8	25.7
2	2.1	1.3	4.29	92.3	5.59			2	5.59	22.2	29.2	41.2	37.2	30
3	2.36	1.13	5.44	91.1	6.57			3	6.57	18.33	24.4	45.2	38.3	30.9
4	2.31	9.36	10.6	77.7	19.96			AV	5.4	20.1633	26.7	41.1	36.7667	28.8667
5	2.69	10.5	11.7	75	22.2			SD	1.27566	1.943	2.40624	4.1509	1.78979	2.77909
6	2.25	7.83	10.5	79.4	18.33			P		0.000387985	0.000171896	0.00014127	1.58972e-05	0.000185171
7	1.92	14.7	11.8	71.6	26.5							0.00652326		0.0143828
8	1.63	17.3	11.9	69.2	29.2
9	0.78	12.8	11.6	73.8	24.4
10	1.91	23.3	13.6	61.2	36.9
11	2.08	26.8	14.4	56.7	41.2
12	2.14	30.5	14.7	52.7	45.2
13	1.85	20.8	14	63.4	34.8
14	1.91	23.7	13.5	60.9	37.2
15	2.25	24.5	13.8	59.7	38.3
16	4.06	15.4	10.3	70.2	25.7
17	3.82	18.8	11.2	66.1	30
18	3.93	19.9	11	65.2	30.9

[truncated: 5 more sheets: Figure 6C, Figure 7A, Figure 7B, Figure 8A, Figure 8B]
